# Supplementary material for: Non-pharmacological interventions to achieve blood pressure control in African patients: a systematic review
Source: PubMed Central journal article supplement — BMJ Open. 2022 Feb 28;12(2):e048079. doi: 10.1136/bmjopen-2020-048079 (PMC8886440; doi:10.1136/bmjopen-2020-048079), 2022-02-28
Supplement: bmjopen-2020-048079.draft_revisions.pdf [file bmjopen-2020-048079.draft_revisions.pdf]

# BMJ Open

BMJ Open is committed to open peer review. As part of this commitment we make the peer review history of every article we publish publicly available.

When an article is published we post the peer reviewers' comments and the authors' responses online. We also post the versions of the paper that were used during peer review. These are the versions that the peer review comments apply to.

The versions of the paper that follow are the versions that were submitted during the peer review process. They are not the versions of record or the final published versions. They should not be cited or distributed as the published version of this manuscript.

BMJ Open is an open access journal and the full, final, typeset and author-corrected version of record of the manuscript is available on our site with no access controls, subscription charges or pay-per-view fees (<http://bmjopen.bmj.com>).

If you have any questions on BMJ Open's open peer review process please email [info.bmjopen@bmj.com](mailto:info.bmjopen@bmj.com)

# BMJ Open

## Non-pharmacological interventions to achieve blood pressure control in African patients: a systematic review

|                               |                                                                                                                                                                                                                                                                                                                                                                                                                                                                                                                                                                                                                                                                                                                                                                                                                                                                                                                                                                                                                                                  |
|-------------------------------|--------------------------------------------------------------------------------------------------------------------------------------------------------------------------------------------------------------------------------------------------------------------------------------------------------------------------------------------------------------------------------------------------------------------------------------------------------------------------------------------------------------------------------------------------------------------------------------------------------------------------------------------------------------------------------------------------------------------------------------------------------------------------------------------------------------------------------------------------------------------------------------------------------------------------------------------------------------------------------------------------------------------------------------------------|
| Journal:                      | <i>BMJ Open</i>                                                                                                                                                                                                                                                                                                                                                                                                                                                                                                                                                                                                                                                                                                                                                                                                                                                                                                                                                                                                                                  |
| Manuscript ID                 | bmjopen-2020-048079                                                                                                                                                                                                                                                                                                                                                                                                                                                                                                                                                                                                                                                                                                                                                                                                                                                                                                                                                                                                                              |
| Article Type:                 | Original research                                                                                                                                                                                                                                                                                                                                                                                                                                                                                                                                                                                                                                                                                                                                                                                                                                                                                                                                                                                                                                |
| Date Submitted by the Author: | 04-Jan-2021                                                                                                                                                                                                                                                                                                                                                                                                                                                                                                                                                                                                                                                                                                                                                                                                                                                                                                                                                                                                                                      |
| Complete List of Authors:     | Cernota, Monique; Martin-Luther-Universität Halle-Wittenberg Medizinische Fakultät, Institute of General Practice and Family Medicine, Center of Health Sciences<br>Kroeber, Eric; Martin-Luther-Universität Halle-Wittenberg, Institute of General Practice and Family Medicine, Center of Health Sciences<br>Demeke, Tamiru; Addis Ababa University School of Public Health<br>Frese, T; Martin-Luther-Universität Halle-Wittenberg Medizinische Fakultät, Institute of General Practice and Family Medicine, Center of Health Sciences<br>Getachew, Sefonias; Addis Ababa University School of Public Health<br>Kantelhardt, Eva; Martin-Luther-Universität Halle-Wittenberg Medizinische Fakultät, Institute for Medical Epidemiology, Biostatistics and Informatics, Center of Health Sciences<br>Unverzagt, Susanne; Martin-Luther-Universität Halle-Wittenberg Medizinische Fakultät, Institute of General Practice and Family Medicine, Center of Health Sciences; Universität Leipzig Medizinische Fakultät, Department of Primary Care |
| Keywords:                     | Hypertension < CARDIOLOGY, INTERNAL MEDICINE, PREVENTIVE MEDICINE, Quality in health care < HEALTH SERVICES ADMINISTRATION & MANAGEMENT, PRIMARY CARE, PUBLIC HEALTH                                                                                                                                                                                                                                                                                                                                                                                                                                                                                                                                                                                                                                                                                                                                                                                                                                                                             |
|                               |                                                                                                                                                                                                                                                                                                                                                                                                                                                                                                                                                                                                                                                                                                                                                                                                                                                                                                                                                                                                                                                  |

SCHOLARONE™  
Manuscripts

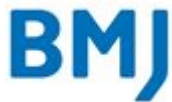

I, the Submitting Author has the right to grant and does grant on behalf of all authors of the Work (as defined in the below author licence), an exclusive licence and/or a non-exclusive licence for contributions from authors who are: i) UK Crown employees; ii) where BMJ has agreed a CC-BY licence shall apply, and/or iii) in accordance with the terms applicable for US Federal Government officers or employees acting as part of their official duties; on a worldwide, perpetual, irrevocable, royalty-free basis to BMJ Publishing Group Ltd ("BMJ") its licensees and where the relevant Journal is co-owned by BMJ to the co-owners of the Journal, to publish the Work in this journal and any other BMJ products and to exploit all rights, as set out in our [licence](#).

The Submitting Author accepts and understands that any supply made under these terms is made by BMJ to the Submitting Author unless you are acting as an employee on behalf of your employer or a postgraduate student of an affiliated institution which is paying any applicable article publishing charge ("APC") for Open Access articles. Where the Submitting Author wishes to make the Work available on an Open Access basis (and intends to pay the relevant APC), the terms of reuse of such Open Access shall be governed by a Creative Commons licence – details of these licences and which [Creative Commons](#) licence will apply to this Work are set out in our licence referred to above.

Other than as permitted in any relevant BMJ Author's Self Archiving Policies, I confirm this Work has not been accepted for publication elsewhere, is not being considered for publication elsewhere and does not duplicate material already published. I confirm all authors consent to publication of this Work and authorise the granting of this licence.

# Non-pharmacological interventions to achieve blood pressure control in African patients: a systematic review

## First Authors:

Mrs. Monique Cernota

Institute of General Practice and Family Medicine, Center of Health Sciences, Martin-Luther-University Halle-Wittenberg, Magdeburger Str. 8, 06112 Halle (Saale), Germany  
[m.cernota78@googlemail.com](mailto:m.cernota78@googlemail.com)

MD Eric Sven Kroeber (**Corresponding Author**)

Institute of General Practice and Family Medicine, Center of Health Sciences, Martin-Luther-University Halle-Wittenberg, Magdeburger Str. 8, 06112 Halle (Saale), Germany  
[Eric.kroeber@uk-halle.de](mailto:Eric.kroeber@uk-halle.de)  
[Eric.kroeber@posteo.de](mailto:Eric.kroeber@posteo.de)

## Coauthors:

Mr. Tamiru Demeke

School of Public Health, College of Health Sciences, Addis Ababa University, Addis Ababa, Ethiopia  
[tamirudemeke@yahoo.com](mailto:tamirudemeke@yahoo.com)

Prof. MD Thomas Frese

Institute of General Practice and Family Medicine, Center of Health Sciences, Martin-Luther-University Halle-Wittenberg, Magdeburger Str. 8, 06112 Halle (Saale), Germany  
[Thomas.frese@uk-halle.de](mailto:Thomas.frese@uk-halle.de)

Mr. Sefonias Getachew

School of Public Health, College of Health Sciences, Addis Ababa University, Addis Ababa, Ethiopia  
[safoget@yahoo.com](mailto:safoget@yahoo.com)

MD Eva Johanna Kantelhardt

Institute of Medical Epidemiology, Biostatistics and Informatics, Center of Health Sciences, Martin-Luther-University Halle-Wittenberg, Magdeburger Str. 8, 06112 Halle (Saale), Germany  
[Eva.kantelhard@uk-halle.de](mailto:Eva.kantelhard@uk-halle.de)

## Last Author:

PhD Susanne Unverzagt

Institute of General Practice and Family Medicine, Center of Health Sciences, Martin-Luther-University Halle-Wittenberg, Magdeburger Str. 8, 06112 Halle (Saale) Germany  
Department of General Practice, University of Leipzig, Faculty of Medicine, Philipp-Rosendahl-Strasse 5, 04103 Leipzig, Germany  
[Susanne.unverzagt@uk-halle.de](mailto:Susanne.unverzagt@uk-halle.de)

## Abstract

**Objectives:** This systematic review aims to evaluate the evidence of non-pharmacological strategies to improve blood pressure (BP) control in hypertensive patients from African countries.

**Design:** We performed a systematic review and searched Medline, Central, CINAHL, and study registers until June 2020 for randomized studies on interventions to decrease BP of patients with hypertension in African countries. We assessed the study quality using the Cochrane risk of bias tool and narratively described studies on non-pharmacological hypertension interventions.

**Setting:** We included studies conducted in African countries in primary and secondary care settings.

**Participants:** Adult African patients with a hypertension diagnosis.

**Interventions:** Studies on non-pharmacological interventions aiming to improve BP control and treatment adherence.

**Outcomes:** Main outcomes were BP and treatment adherence. We removed the planned outcomes NYHA stage, hospital admission and death, since we decided to focus this review from cardiovascular diseases in general to hypertension due to the amount of search results.

**Results:** We identified 5564 references, included 23 with altogether 18,153 participants from six African countries. The studies investigated educational strategies to improve adherence (11 studies) and treatment by health care professionals (5 studies), individualized treatment strategies (2 studies), strategies on lifestyle including physical activity (4 studies) and modified nutrition (1 study). Nearly all studies on educational strategies stated improved adherence, but only three studies showed a clinically relevant benefit on BP control. All studies on individualized strategies and lifestyle changes resulted in clinically relevant effects on BP.

**Conclusions:** The identified studies offer a wide range of effective low-cost interventions including educative and task shifting strategies, individualized treatment, as well as lifestyle modifications to improve BP control. All strategies were trialed in African countries and can be used for recommendations in evidence-based guidelines on hypertension in African settings.

**Review registration:** A protocol was registered on PROSPERO (CRD42018075062).

## Strength and limitations of this study

- This systematic review summarizes evidence on a wide range of different non-pharmacological interventions, adding a comprehensive overview to the literature that can support physicians and health care policy makers in the African setting.
- Most of the included studies were conducted in urban areas of few Western and Southern African countries leading to a lack of generalizability to other African regions and showing a need of future research in rural areas.
- A main limitation of this systematic review occurs through deviations from the protocol. Due to the amount of search results for the initially planned more general scope on cardiovascular diseases we decided to focus on hypertension.
- Nevertheless, this review was limited to studies with the highest level of evidence to investigate the benefits and harms of non-pharmacological interventions on blood pressure control in African patients with hypertension.
- This review adds to the scope of a recently published a systematic review on the efficacy of common pharmacological treatment for hypertensive patients in Sub-Saharan Africa.

1  
2  
3 **Keywords:**  
4

5  
6 systematic review, Africa, hypertension, raised blood pressure, non-pharmacological interventions,  
7 randomized controlled trials  
8  
9  
10  
11  
12  
13  
14  
15  
16  
17  
18  
19  
20  
21  
22  
23  
24  
25  
26  
27  
28  
29  
30  
31  
32  
33  
34  
35  
36  
37  
38  
39  
40  
41  
42  
43  
44  
45  
46  
47  
48  
49  
50  
51  
52  
53  
54  
55  
56  
57  
58  
59  
60

For peer review only

## Background

Hypertension is a major public health problem and affects the lives of about 1.13 billion people (1). The highest blood pressure levels shifted from high to low-income countries in South Asia and Sub-Saharan Africa (SSA) (2) with a prevalence of 57 % in older adults in African countries (3, 4). The estimated number of adults with raised blood pressure in SSA rose from 30 million in 1975 to over 100 million in 2016 due to population growth, aging, and westernization of lifestyle (2). Hypertension is a leading risk factor of cardiovascular disease, chronic kidney disease, and diabetes (1). Studies show that black people suffer from more severe forms of hypertension associated with more frequent treatment failure and more severe and earlier target organ damage, all resulting in higher morbidity and mortality (5, 6). Hypertension is a major contributor to devastating health events like stroke or heart failure (7-9), which can be catastrophic to both individuals and healthcare systems in which resources are scarce.

Tackling and reducing the burden of premature mortality due to non-communicable diseases (NCDs) through prevention and treatment has been a designated goal within the UN 2030 Agenda (10). The Pan-African Society of Cardiology developed an algorithm including recommendations on screening, diagnosis, and treatment to achieve 25 % hypertension control in Africa by 2025 with a treatment target value of less than 140/90 mmHg. Screening programs are proposed to be carried out in health care facilities as well as public places like markets and churches. The treatment starts with lifestyle modifications, is intensified through a monotherapy and a subsequent combination of two or three medications in higher stages and resistant forms of hypertension. In some cases, the assessment of secondary causes by specialists is recommended (9).

However, the awareness of hypertension remains relatively low in many parts of Africa, hindering adequate screening, treatment, and control to lower the long-term risks (11-13). Extensive counseling and education of patients and health-care providers on the importance of adherence to medications and lifestyle modifications is necessary in order to improve hypertension control (14, 15). Especially patients with multiple medications benefit from the support of their health care providers to understand the treatment's purpose (16).

Evidence is needed detailing regional differences in hypertension incidences, risk factors, and, as subject of this review, treatment strategies in different, transitioning populations on the African continent. Seeley et al. recently published a systematic review on the efficacy of common pharmacological treatment for hypertensive patients in SSA (17). These interventions do not include treatment strategies like lifestyle modifications (e.g., nutritional modifications, physical activity) or educational strategies, which can be summarized as non-pharmacological interventions (18). Hence,



1  
2  
3 the main aim of this systematic review is to add the best available evidence on the effectiveness of  
4 non-pharmacological strategies on blood pressure control in African patients with hypertension.  
5  
6  
7  
8  
9  
10  
11  
12  
13  
14  
15  
16  
17  
18  
19  
20  
21  
22  
23  
24  
25  
26  
27  
28  
29  
30  
31  
32  
33  
34  
35  
36  
37  
38  
39  
40  
41  
42  
43  
44  
45  
46  
47  
48  
49  
50  
51  
52  
53  
54  
55  
56  
57  
58  
59  
60

For peer review only

## Main Text

## Methods

A protocol of this systematic review was prospectively registered on PROSPERO (CRD42018075062) following the PRISMA guideline (19) (see Checklist S1). We initially planned to include randomized controlled trials (RCTs) on all cardiovascular diseases (CVDs). Due to the high number and heterogeneity of eligible studies, we decided to focus this review on patients with hypertension as one of the main risk factors for other CVDs. We aim to describe all non-pharmacological hypertension interventions in detail in order to broaden the scope of the existing evidence.

## Patient and public involvement

The conception of this systematic review was discussed in detail with members and students at the Addis Ababa School of Public Health in order to consider the priorities in the African context. Consensus was to gather evidence on hypertension treatment as a measure of tackling the burden of non-communicable diseases which is part of the UN 2030 Agenda (10). No patients were involved.

## Inclusion and exclusion criteria

We included full-text publications on RCTs (20) including cross-over RCTs and cluster RCTs on non-pharmacological interventions with adult hypertensive patients in African countries and reported results on BP. The study aims were improvement of prevention, diagnoses, and treatment of hypertension in African countries. Studies on primary prevention were excluded due to the high variety of possible participants and interventions. International multi-center studies were included if more than 50 % of centers were set in African countries. For detailed inclusion criteria see Table 1.

>>>> Table 1

## Literature search and study selection

Two electronic databases (Medline Ovid, Central) and registers of ongoing and completed studies (International Clinical Trials Registry Platform) were searched to identify all relevant studies (see Additional file 1). We added a search in CINAHL to cover nursing interventions. The main keywords of the search strategy included hypertension, high blood pressure, blood pressure control, Africa, a list

1  
2  
3 of all African countries, and randomized controlled trials. The first searches in 2017 included all CVDs,  
4 while updated strategies were limited to hypertension. The last search was conducted in June 2020.  
5 All searches were done without time frame constrictions. The study selection process was described  
6 in a flow chart according to the PRISMA statement (19). We exported articles retrieved from the  
7 literature search into a reference manager software (EndNote (21)). Duplicate references were  
8 identified in case of congruence of authors, title, year, and journal and deleted.  
9  
10 Titles, abstracts, and full texts of potentially eligible articles were independently screened by three  
11 authors (MC, ESK and SU). Disagreements were resolved through consensus.  
12  
13  
14  
15  
16  
17

## 18 Interventions

19  
20  
21 This systematic review compares non-pharmacological interventions to improve adequate diagnoses,  
22 prevention, and treatment of patients with hypertension with standard care, no intervention or  
23 another, less intensive or frequent intervention (Table 1).  
24  
25  
26

## 27 Outcomes

28  
29  
30 The main outcomes of the primary planned systematic review on CVD were blood pressure, NYHA,  
31 hospital admission, and death within the longest follow-up period. Costs were planned as an additional  
32 outcome. The main goal of non-pharmacological interventions for patients with hypertension is to  
33 improve blood-pressure control through the implementation of recommended lifestyle changes,  
34 attendance to follow-up visits, and interventions promoting adherence to take hypertensive  
35 medications. We therefore report results on blood pressure and adherence (Table 1).  
36  
37  
38  
39  
40  
41

## 42 Data extraction and management

43  
44  
45 One author (MC or SU) extracted and a second author (SU or ESK) checked all information on study  
46 design and setting, participants, interventions, and main results by using an assessment form in Excel.  
47 The form was especially designed for this systematic review and piloted for the first five studies.  
48  
49 We extracted information on the publication (study name consisting of the name of first author and  
50 year of the first publication of final results, registration, and additional publications), study  
51 characteristics (design, country and region in which the study was conducted, duration, pre-planned  
52 outcomes), participants (with inclusion/exclusion criteria, randomized sample size, prevention level,  
53 grade of hypertension, mean age, baseline blood pressure), a short description of the intervention  
54 and control groups, and the main results on blood pressure and adherence within the longest follow-  
55 up periods. The grade of hypertension was described as mild (grade 1, 140-159/90-99 mmHg),  
56  
57  
58  
59  
60

1  
2  
3 moderate (grade 2, 160-179/100-109 mmHg) or severe (grade 3,  $\geq 180/\geq 110$  mmHg) (15). If BP was  
4 reported in standing and supine position, we extracted results for supine position.  
5

6 All effect sizes were reported with their corresponding confidence intervals (CI). They were calculated  
7 either on the basis of mean and standard deviation for metric outcomes or by comparing the  
8 frequencies of better adherence or BP control. Positive mean differences (MDs) describe a positive  
9 treatment effect on BP with lower mean values or higher decrease in the intervention group. Relative  
10 risks (RR), hazard ratios (HR) and odds ratios (OR) compare the frequency of good adherence or BP  
11 control. Effect measures greater than 1 describe a better adherence or BP control in the intervention  
12 group.  
13  
14  
15  
16  
17  
18  
19

## 20 Quality assessment and risk of bias

21  
22 Risk of bias was evaluated for all studies based on the Cochrane risk of bias tool (22). Two investigators  
23 (MC or ESK and SU) independently assessed the risk of bias in seven domains (sequence generation,  
24 allocation concealment, blinding of personal and participants, blinding of outcome assessors,  
25 incomplete outcome data, selective outcome reporting, and other sources of bias). Risk of bias due to  
26 selective outcome reporting was judged as low, when the study protocol was available and results on  
27 all pre-planned outcomes were reported. Incomplete outcome data was judged as high, when more  
28 than 10 % of randomized participants dropped out. Other sources of bias were reported to be high in  
29 cases of missing sample size calculation, no definition of the primary endpoint, or no reporting of  
30 baseline values.  
31  
32  
33  
34  
35  
36  
37  
38  
39

## 40 Data synthesis

41  
42 The main aim of this review is a narrative synthesis of studies with their participants, different types  
43 of interventions, and resulting outcomes. We added a figure visualizing the effect sizes on BP of  
44 different types of interventions in forest plots using RevMan (23). Due to the high clinical  
45 heterogeneity between included studies with their different settings, interventions, control groups,  
46 and lengths of follow-up, we did not pool any results.  
47  
48  
49

50 Treatment effects were described as statistically significant or clinically relevant. Statistically significant  
51 results on BP with MD over 5 mmHg were defined as clinically relevant.  
52  
53  
54  
55  
56  
57  
58  
59  
60

## Results

We identified a total of 5564 references from electronic databases and 18 references from the International Clinical Trials registry platform. 340 articles were potentially eligible and full texts were assessed for the inclusion and exclusion criteria. Of those, 298 articles were excluded including 13 articles on studies to treat heart failure, 7 articles on coronary heart diseases, and 76 articles on pharmacotherapy for hypertension. Twenty-three studies (reported in 42 articles) (24-66) on non-pharmacological strategies to treat patients with hypertension matched the inclusion criteria and were included in this systematic review (Figure 1 and list of included studies in the appendix). The characteristics and main results of these studies were summarized in Table 2.

>>>>> Figure 1

### Study characteristics

We identified 15 studies with two or more independent parallel groups and individual randomization of patients and eight cluster-RCTs with randomization of different observation units, such as independent villages, health-care facilities, or different geographical regions (Table 2). Most of the included studies were conducted in Nigeria (11 studies) and South Africa (8 studies), others in Ghana, Kenya, Cameroon and Egypt. One of the studies (25) recruited patients in three countries (South Africa, Nigeria and Kenya). Seven studies (30 %) were at least partly conducted in rurally located health-care facilities (Figure 2). The included studies were published between 1991 and 2019. Only three of the studies, all conducted South Africa, were published before 2010.

>>>>> Figure 2

### Participants

The total sample size ranged from 30 to 4722 participants with a total number of 18,153 participants (Table 2). Eighteen studies (78 %) randomized more than 100 participants. The mean age was between 45 and 63 years. Most studies (19 studies) included more females. Two studies to enhance physical activity included women (63) or men (37) only. Mean systolic blood pressure (SBP) at baseline was between 128 and 175 mmHg, mean diastolic blood pressure (DBP) between 76 and 117 mmHg. Most studies included patients in secondary prevention with mild to moderate hypertension. Three studies (56, 58, 66) included hypertensive patients post stroke.

## Intervention

Studies investigated educational strategies to improve adherence of patients and treatment by health care professionals (16 studies), to individualize treatment (2 studies), and to change lifestyle via enhanced physical activity (4 studies) or modified nutrition (1 study) (Table 2).

>>>> Table 2

### *Educational strategies to improve adherence*

Sixteen studies (17,090 participants), with follow-up periods from two weeks in a short-term feasibility study (66) up to 18 months (34), were published between 1991 and 2019.

The main aim of eleven studies was the improvement of patients' knowledge on hypertension and adherence to self-monitoring of BP, recommendations on medication, lifestyle changes, and regular attendance at health-care facilities (24, 27-29, 36, 56, 58, 60, 61, 64, 66). Five studies investigated strategies to improve adequate treatment of hypertensive patients by clinicians, nurses, and health-care workers (32, 34, 35, 52, 62).

Eight studies (27, 28, 36, 56, 58, 60, 61, 64) investigated the efficacy of adherence-promotion via counselling and phone or letter-based interventions. Seven studies (24, 29, 32, 34, 35, 52, 66) investigated the efficacy of interventions on the basis of training measures with subsequent task-shifting to nurses or health workers for home visits and patient education. One study (Steyn 2013 (62)) tested a multi-faced intervention to implement national South-African guidelines into primary care of patients with hypertension or diabetes. Another two studies investigated the efficacy of financial incentives as an additional health insurance coverage (Gyamfi 2017 (35)) or free treatment (Labhardt 2011 (36)), respectively.

Nearly all studies stated improved medication adherence (Adeyemo 2013, Bobrow 2016, Bolarinwa 2019, Labhardt 2011, Saunders 1991, Stewart 2005), implementation of lifestyle recommendations (Ayodapo 2019, Mendis 2010), linkage to care (Labhardt 2011, Mendis 2010, Vedanthan 2019), or knowledge and practical skills of healthcare professionals (Fairall 2016, Gyamfi 2017). In only three studies (Ayodapo 2019, Bobrow 2016, Borarinwa 2019) (27-29), these improvements resulted in modest benefits on BP (Table 2 and Figure 3C). In the study by Ayodapo 2019 (27), counseling had a positive impact on lifestyle behavior and resulted in a clinically relevant decrease of mean arterial BP (-9.8 mmHg; 95 %CI -11.5 to -8.1). (Bobrow 2016 (28)) assessed the effect of automated treatment adherence support delivered via mobile phone short messages. (Bolarinwa 2019 (29)) trialed home-based follow-up care with education and counseling of patients and modifications of environmental characteristics. Both studies achieved a 12 % higher BP control with SBP<140 mmHg and

1  
2  
3 DBP < 90 mmHg in participants of the intervention compared to the control groups (RR: 1.12; 95 % CI  
4 1.01 to 1.23 and 1.12; 95 % CI 1.00 to 1.25) (Figure 3).  
5  
6  
7

8 >>>> Figure 3  
9

### 10 11 *Individualized treatment strategies* 12

13 Two studies (286 participants) with follow-up periods of 3 and 12 months were published in 2011 and  
14 2017. Both investigated strategies on the efficacy of an individualized therapy. Therapy  
15 individualization based on the patients' renin/aldosterone profile (Akintunde 2017 (25)) resulted in  
16 more appropriate prescriptions and a relevant decrease of SBP (MD: -13.2 mmHg; 95 % CI -19.4 to -  
17 7.0) and DBP (MD: -5.6; 95 % CI -9.4 to -1.8) in patients with uncontrolled hypertension. The second  
18 study (Okeahialam 2011 (55)) showed a higher reduction of DBP in patients using their anti-  
19 hypertensives at night compared to a morning intake (MD: -6.9 mmHg; 95 % CI -10.4 to -3.4), but  
20 stated no change in SBP (Table 2).  
21  
22  
23  
24  
25  
26  
27  
28  
29

### 30 31 *Strategies with physical activity* 32

33 Four studies (685 participants), published between 2010 and 2016, investigated the BP-lowering effect  
34 of different aerobic training strategies over 4 to 12 weeks. Enhanced physical activities were  
35 performed two or three times a week and included dance training (26, 51) and exercise training on an  
36 ergometer (37) or treadmill (63).  
37

38 All studies stated a clinically relevant benefit with mean reductions of SBP between 21 and 7.1 mmHg  
39 and DBP between 10 and 1.4 mmHg (Figure 4). The highest BP decrease was achieved in a study on  
40 the effect of moderate aerobic exercise training by walking on a treadmill in postmenopausal  
41 hypertensive women (Turky 2013 (63)) (MD: -21 mmHg; 95 %-CI 25.8 to -16.2).  
42  
43  
44  
45  
46

47 >>>> Figure 4  
48  
49

### 50 51 *Modified nutrition strategies* 52

53 Charlton 2008 tested a food-based dietary strategy (reduced salt consumption) in 92 mildly to  
54 moderately hypertensive patients from a low socio-economic background (31), stating a clinically  
55 relevant decrease in SBP after two months (MD: -6.2 mmHg; 95 % CI -11.4 to -0.9), but no effect on  
56 DBP (Table 2).  
57  
58  
59  
60

## Potential biases

The greatest restriction of study quality was a high risk of bias in the blinding of staff and study participants in 19 studies. Especially educational strategies were not examined in double-blinded studies, however three of these studies (Goudge 2018, Owolabi 2019, Sarfo 2019) (34, 56, 58) reported a quality assurance against detection bias with blinded measurement of blood pressure. Two studies on physical activity enhancement in comparison to usual care (37, 51) (Lamina 2010, Maruf 2016) were described as double-blinded without reporting further details. Only the study on modified nutrition (31) (Charlton 2008) adequately reported detailed methods to ensure blinding of participants and fieldworkers. Another frequent problem was incomplete outcome data in 14 studies with loss to follow-up over 10 % of randomized participants or per-protocol analyses. Selective reporting was checked in all 13 studies with a published protocol. Of those, five studies (Bolarinwa 2019, Gyamfi 2017, Labhardt 2011, Owolabi 2019, Maruf 2016) (29, 35, 36, 51, 56) did not report all pre-planned outcomes. Problems concerning randomization were identified in three studies with a non-random component in sequence generation or allocation concealment (25, 37, 52) (Akintunde 2017, Lamina 2010, Mendis 2010). Other sources of bias include missing sample-size calculations, reporting of intermediate results only, and relevant differences at baseline in nine studies (Table 3, Figure 5).

>>>>> Table 3

>>>>> Figure 5



## Discussion

This systematic review describes interventions and treatment effects of 23 studies with a total of 18,153 participants with hypertension from six African countries. Most of the studies investigated successful low-cost concepts to improve BP control through improved adherence to medical treatment and lifestyle changes.

While lower- and middle-income countries' CVD-mortality remained unchanged over the last decades, high-income countries have reduced the CVD-mortality by more than 50 % since 1990 (67), largely by using country-specific guidelines, evidence-based policy interventions to reduce risk-factor levels, strengthening the health system at the primary-care level, and improving acute care with attention to early initiation of treatment. However, policies to reduce population-wide risk factors of hypertension have not been widely adopted in low- and middle-income countries (68).

Pharmacotherapy with the well-established anti-hypertensive medications is the mainstay of hypertension management (15, 69). Nevertheless, treatment recommendations on adherence to medication and changed lifestyle habits are often only incompletely applied in practice (70-72). Patients are frequently unwilling to take drugs due to possible side effects. They may benefit from adequate knowledge as well as a higher motivation to take their prescribed medications and to implement sustainable lifestyle changes (73-75). Despite the frequent lack of acute symptoms, uncontrolled BP may result in severe long-term outcome and increased mortality. The risk increases in cases of inadequate treatment and low patient adherence as well as inconsistent follow-up on BP control (7). Therefore, all strategies with the aim to increase knowledge, awareness, and adherence are essential to lowering BP levels and improving the prognoses of patients (69, 76). Due to the short-term follow-up, no study reported long-term outcomes on mortality, and we interpreted available results on BP changes and treatment adherence.

Several strategies to improve health related behavior concerning hypertension with convincing results were examined. We identified eight studies that investigated the efficacy of phone or letter-based interventions (e.g., via short message service) to improve knowledge on hypertension, with adherence support or reminder letters for follow-up (27, 28, 36, 56, 58, 60, 61, 64). All these studies showed strong effects of the intervention concerning self-reported behavioral changes, but only two of these studies showed improved BP during follow-up (27-28). Three studies (29, 35, 52) reported improved adherence and two of those a decreased BP level through nurse-led interventions (29, 52). These studies demonstrated the efficacy of task-shifting interventions in a low-resource setting. Furthermore, low-cost interventions suited to the environment, including financial incentives for adherent patients with minimal additional resources, can significantly improve the adherence of patients (36) and thus potentially influence BP control.

1  
2  
3 Even though cost-effective interventions are globally available, there are major gaps in their  
4 implementation, particularly in limited resource settings (68). Two large multi-level studies that  
5 combined phone or letter-based interventions with task-shifting to nurses or health workers were not  
6 successful in achieving a relevant improvement in adherence and BP control (32, 34). On the other  
7 hand, no harm was observed after the expansion of the nurses' roles (32). Thus, the intervention might  
8 be a practical and acceptable tool to expand the scope of non-physician clinicians into primary care of  
9 patients with common NCDs. There is a generally good access to essential medications in four  
10 countries where the included studies have been conducted (South Africa, Egypt, Kenya and Ghana).  
11 The access is not as widespread in Cameroon and Nigeria (77). Nevertheless, one study conducted in  
12 rural parts of South Africa between 2014 to 2015 (34) reported insufficient or unavailable equipment  
13 and medication shortage. Moreover, increasing numbers of NCD patients require an adequate number  
14 of nursing personnel as well as health care facilities. Similar factors contributed to the poor results of  
15 the implementation of national guidelines in resource-scarce primary health care settings in South  
16 Africa (62), which did not show improved outcomes in hypertension and diabetes patients. In studies  
17 with follow-up-periods of less than one year, the time frame might have been too short to reach a  
18 clinically relevant BP control through improved knowledge and awareness, since lifestyle changes are  
19 oftentimes challenging and should be applied over a long time (24, 61, 66). Generally, the results of  
20 the systematic review are consistent with existing evidence on the importance of long-acting patient  
21 centered interventions. Unfortunately, these interventions do not reach all patients and often, a full  
22 benefit of medical treatment on clinically important outcomes cannot be achieved (78).

23  
24  
25 Most studies in this review included participants in secondary prevention with mild to moderate  
26 hypertension. In contrast, observational studies and conclusions from a systematic review on  
27 pharmacological treatment generally concerned participants with higher grades of hypertension (5, 7,  
28 79). Interventions for patients with severe or uncontrolled hypertension and potentially target-organ  
29 damage are underrepresented. Interventions for high-risk patients are especially necessary due to the  
30 high frequency of late first diagnosis (7) and high prevalence of severe forms of hypertension at an  
31 early age in African patients (6). A multi-center study on patients with uncontrolled hypertension in  
32 clinics in Nigeria, Kenya, and South Africa stated the efficacy of an individualized therapy based on  
33 phenotyping with plasma renin and aldosterone to improve BP control (25). The researchers suggest  
34 testing this approach in African Americans and patients of any race with therapy-resistant  
35 hypertension. Three studies (56, 58, 66) investigated the implementation of multi-level approaches  
36 including educational, telephone-based, nurse-led, self-management supporting interventions, as well  
37 as BP monitoring for stroke survivors. These studies were not successful in sufficiently improving BP  
38 control, possibly due to short follow-up periods.

1  
2  
3 Regarding the different grades of hypertension, low risk patients with grade 1 hypertension benefit  
4 from lifestyle modifications including regular physical activity, sodium restriction, weight reduction,  
5 smoking cessation, moderation of alcohol consumption, and other dietary changes. These are  
6 recommended as initial strategies to reduce BP levels in order to prevent or delay the use of  
7 pharmacotherapy (14, 15). Nevertheless, even for patients with higher grades of hypertension,  
8 lifestyle modifications remain important in addition to pharmacotherapy (14, 15, 69, 80). The clinically  
9 accepted relevant BP lowering effect of medium-to high-intensity physical activity as a single or  
10 additive treatment for hypertension (81) was demonstrated in four of the included studies (26, 37, 51,  
11 63). Only one study from South Africa investigated the effect of a modified nutrition strategy  
12 (reduction of salt intake) and stated a clinically relevant effect on SBP (31). To the authors' knowledge,  
13 no randomized study investigated the efficacy of other recommended lifestyle interventions, like  
14 smoking cessation or weight reduction, in hypertensive patients in an African country.  
15  
16  
17  
18  
19  
20  
21  
22  
23  
24

## 25 Strengths and Limitations of this Review

26  
27  
28 We were able to generate evidence on a wide range of different non-pharmacological interventions,  
29 adding a comprehensive overview to the literature that can support physicians and health care policy  
30 makers in the African setting.  
31

32  
33 A main limitation occurs through deviations from the protocol. We planned a comprehensive summary  
34 of all RCTs to prevent, diagnose, and treat patients with cardiovascular diseases in African countries.  
35 Due to a high number of eligible studies in the first systematic search, we decided to focus on published  
36 studies on hypertension. We therefore had to change the pre-planned outcomes and instead focus on  
37 BP and additionally describe results on medication adherence and lifestyle changes. The pre-planned  
38 outcomes mortality, NYHA, and hospital admission were dropped. Due to the recently published  
39 systematic review by Seeley et al. (17), this publication describes non-pharmacological strategies. The  
40 complete results, including pharmacological interventions, were summarized in a doctoral thesis paper  
41 (82).  
42  
43  
44  
45  
46  
47

48 Nevertheless, this review was limited to studies with the highest level of evidence to investigate the  
49 benefits and harms of non-pharmacological interventions for hypertension. The randomized allocation  
50 ensures the comparability of participants across intervention groups. However, the unfeasibility of  
51 double-blinding might restrict the internal validity of results.  
52  
53

54 The external validity might be limited by our restriction to studies published in the English language  
55 and the disproportionately high number of studies conducted in urban areas in some Western and  
56 Southern African countries. According to the United Nations, there are currently 54 African countries.  
57 RCTs have been conducted in only six of those countries. Inhabitants of these countries (approximately  
58  
59  
60

1  
2  
3 480 million) represent only a fraction of the African population of about 1.34 billion (83). Especially  
4 Central and Northern Africa were underrepresented. There are high levels of diversity within and  
5 between African populations. Subpopulations with genetic variants are living in geographically distant  
6 areas with specific local lifestyle or environmental conditions, which may be associated with a  
7 susceptibility to specific NCDs (84). Therefore, it is uncertain whether our results can be extrapolated  
8 to patients living in other areas than those studied. A significant amount of the African population lives  
9 in rural areas while the majority of studies was conducted in urban settings. However, it is crucial to  
10 make health service available as close as possible to the population in order to achieve the most  
11 comprehensive care. Thus, research on non-pharmacological interventions such as educational  
12 strategies to improve adherence and lifestyle modification should be expanded across all parts of  
13 Africa. Research must be conducted especially in rural areas to ensure a higher generalizability, quality  
14 of services, and resulting improvement of the African peoples' health.  
15  
16  
17  
18  
19  
20  
21  
22  
23  
24  
25  
26  
27  
28  
29  
30  
31  
32  
33  
34  
35  
36  
37  
38  
39  
40  
41  
42  
43  
44  
45  
46  
47  
48  
49  
50  
51  
52  
53  
54  
55  
56  
57  
58  
59  
60

## Conclusion

This systematic review shows that even though hypertension is a critical health problem, there are still very few randomized studies on non-pharmacological treatment of hypertension conducted on the African continent. Available studies are not representative of all Africans and were conducted in only a few countries. It is therefore advisable to plan and implement studies on patients with hypertension and health-care professionals in rural areas as well as Northern and Central African countries.

An improvement in the prognosis of patients with high BP in Africa requires the implementation of comprehensive diagnostics, education to enhance adherence to recommended medical treatment, lifestyle changes, and subsequent regular checks. The identified studies describe effective approaches tested in African countries that can be used to generate specific African evidence-based guidelines. The approaches include low-cost interventions including task shifting, education, individualized treatment and lifestyle modifications to improve BP control.

## List of abbreviations

|     |                             |
|-----|-----------------------------|
| BP  | Blood pressure              |
| CI  | Confidence interval         |
| CVD | Cardiovascular disease      |
| DBP | Diastolic blood pressure    |
| HR  | Hazard ratio                |
| MD  | Mean difference             |
| NCD | Non-communicable disease    |
| OR  | Odds ratio                  |
| RCT | Randomized controlled trial |
| RR  | Relative Risk               |
| SBP | Systolic blood pressure     |
| SSA | Sub-Saharan Africa          |

## Declarations

### Ethics approval and consent to participate

No ethics approval and consent to participate was necessary.

### Consent for publication

Not applicable.

### Availability of data and materials

Please find the search strategy and a list of included studies in the supplementary material.

### Competing interests

The authors declare that they have no competing interests.

### Funding

This research received no specific grant from any funding agency in the public, commercial or non-profit sector.

### Author contributions

MC

Involved in all steps to plan this systematic review including the protocol; wrote the draft of this manuscript; screening of titles, abstracts, and full texts, data extraction, quality assessment.

ESK

Wrote the draft of this manuscript; screening of titles, abstracts and full texts, data extraction, quality assessment of the last update; submission of the manuscript.

TD

Involved in all steps to plan this systematic review including the protocol; provided expertise and discussed the results in the African context, commented on the manuscript.

TF

Provided expertise on primary care aspects of hypertension treatment, discussed the results, commented on the manuscript.

SG

Provided expertise on CVD epidemiology and public health, discussed the results in the African context, commented on the manuscript.

EJK

Involved in all steps to plan this systematic review including the protocol; provided expertise on the needs of evidence in the African context, commented on the manuscript.

1  
2  
3  
4 SU

5 Involved in all steps to plan this systematic review including the protocol; wrote the draft of this  
6 manuscript, systematic search, screening of titles, abstracts and full texts, data extraction, quality  
7 assessment, submission of the manuscript  
8  
9

## 10 Acknowledgements

11  
12  
13 Not applicable.  
14  
15  
16  
17  
18  
19  
20  
21  
22  
23  
24  
25  
26  
27  
28  
29  
30  
31  
32  
33  
34  
35  
36  
37  
38  
39  
40  
41  
42  
43  
44  
45  
46  
47  
48  
49  
50  
51  
52  
53  
54  
55  
56  
57  
58  
59  
60

For peer review only



## References

1. Danaei G, Lu Y, Singh GM, Carnahan E, Stevens GA, Cowan MJ, et al. Cardiovascular disease, chronic kidney disease, and diabetes mortality burden of cardiometabolic risk factors from 1980 to 2010: a comparative risk assessment. *Lancet Diabetes & Endocrinology*. 2014;634-47.
2. WHO. Worldwide trends in blood pressure from 1975 to 2015: a pooled analysis of 1479 population-based measurement studies with 19.1 million participants. *Lancet*. 2017;389(10064):37-55.
3. Kaze AD, Schutte AE, Erqou S, Kengne AP, Echouffo-Tcheugui JB. Prevalence of hypertension in older people in Africa: a systematic review and meta-analysis. *J Hypertens*. 2017;35(7):1345-52.
4. Bosu WK, Reilly ST, Aheto JMK, Zucchelli E. Hypertension in older adults in Africa: A systematic review and meta-analysis. *PLoS One*. 2019;14(4):e0214934.
5. Brewster LM, Seedat YK. Why do hypertensive patients of African ancestry respond better to calcium blockers and diuretics than to ACE inhibitors and beta-adrenergic blockers? A systematic review. *BMC Med*. 2013;11:141.
6. Brewster LM, van Montfrans GA, Oehlers GP, Seedat YK. Systematic review: antihypertensive drug therapy in patients of African and South Asian ethnicity. *Intern Emerg Med*. 2016;11(3):355-74.
7. Oladapo OO, Salako L, Sadiq L, Shoyinka K, Adedapo K, Falase AO. Target-organ damage and cardiovascular complications in hypertensive Nigerian Yoruba adults: a cross-sectional study. *Cardiovasc J Afr*. 2012;23(7):379-84.
8. Nelissen HE, Hendriks ME, Wit FW, Bolarinwa OA, Osagbemi GK, Bindraban NR, et al. Target organ damage among hypertensive adults in rural Nigeria: a cross-sectional study. *J Hypertens*. 2014;32(3):487-94.
9. Dzudie A, Rayner B, Ojji D, Schutte AE, Twagirumukiza M, Damasceno A, et al. Roadmap to achieve 25% hypertension control in Africa by 2025. *Cardiovasc J Afr*. 2017;28(4):262-72.
10. Nations U. Sustainable development goals. Goal 3: Ensure healthy living and promote well-being for all at all ages 2019 [Available from: <https://www.un.org/sustainabledevelopment/health/>].
11. Gomez-Olive FX, Ali SA, Made F, Kyobutungi C, Nonterah E, Micklesfield L, et al. Regional and Sex Differences in the Prevalence and Awareness of Hypertension: An H3Africa AWI-Gen Study Across 6 Sites in Sub-Saharan Africa. *Glob Heart*. 2017;12(2):81-90.
12. Lloyd-Sherlock P, Beard J, Minicuci N, Ebrahim S, Chatterji S. Hypertension among older adults in low- and middle-income countries: prevalence, awareness and control. *International Journal of Epidemiology*. 2014;43(1):116-28.
13. Guwatudde D, Nankya-Mutyoba J, Kalyesubula R, Laurence C, Adebamowo C, Ajayi I, et al. The burden of hypertension in sub-Saharan Africa: a four-country cross sectional study. *BMC Public Health*. 2015;15:1211.
14. Whelton PK, Carey RM, Aronow WS, Casey DE, Jr., Collins KJ, Dennison Himmelfarb C, et al. 2017 ACC/AHA/AAPA/ABC/ACPM/AGS/APhA/ASH/ASPC/NMA/PCNA Guideline for the Prevention, Detection, Evaluation, and Management of High Blood Pressure in Adults: Executive Summary: A Report of the American College

- of Cardiology/American Heart Association Task Force on Clinical Practice Guidelines. *Hypertension*. 2018;71(6):1269-324.
15. Williams B, Mancia G, Spiering W, Agabiti Rosei E, Azizi M, Burnier M, et al. 2018 ESC/ESH Guidelines for the management of arterial hypertension. *Eur Heart J*. 2018;39(33):3021-104.
16. Fredericksen RJ, Gibbons L, Brown S, Edwards TC, Yang FM, Fitzsimmons E, et al. Medication understanding among patients living with multiple chronic conditions: Implications for patient-reported measures of adherence. *Res Social Adm Pharm*. 2018;14(6):540-4.
17. Seeley A, Prynne J, Perera R, Street R, Davis D, Etyang AO. Pharmacotherapy for hypertension in Sub-Saharan Africa: a systematic review and network meta-analysis. *BMC Medicine*. 2020;18:1-11.
18. Mahmood S, Shah KU, Khan TM, Nawaz S, Rashid H, Baqar SWA, et al. Non-pharmacological management of hypertension: in the light of current research. *Irish Journal of Medical Science (1971-)*. 2019;188(2):437-52.
19. Moher D, Liberati A, Tetzlaff J, Altman DG. Preferred reporting items for systematic reviews and meta-analyses: the PRISMA statement. *PLoS Med*. 2009;6(7):e1000097.
20. Boutron I, Altman DG, Moher D, Schulz KF, Ravaut P. CONSORT Statement for Randomized Trials of Nonpharmacologic Treatments: A 2017 Update and a CONSORT Extension for Nonpharmacologic Trial Abstracts. *Ann Intern Med*. 2017;167(1):40-7.
21. Team TE. EndNote. EndNote X9 ed. Philadelphia, PA: Clarivate; 2013.
22. Higgins JP, Altman DG, Gøtzsche PC, Jüni P, Moher D, Oxman AD, et al. The Cochrane Collaboration's tool for assessing risk of bias in randomised trials. *BMJ*. 2011;343:d5928.
23. Centre; TNC. Review Manager (RevMan) [Computer program]. Version 5.3. In: Collaboration. Copenhagen TC, editor. 2014.
24. Adeyemo A, Tayo BO, Luke A, Ogedegbe O, Durazo-Arvizu R, Cooper RS. The Nigerian antihypertensive adherence trial: a community-based randomized trial. *Journal of Hypertension*. 2013;31(1):201-7.
25. Akintunde A, Nondi J, Gogo K, Jones ESW, Rayner BL, Hackam DG, et al. Physiological Phenotyping for Personalized Therapy of Uncontrolled Hypertension in Africa. *Am J Hypertens*. 2017;30(9):923-30.
26. Aweto HA, Owoeye OB, Akinbo SR, Onabajo AA. Effects of dance movement therapy on selected cardiovascular parameters and estimated maximum oxygen consumption in hypertensive patients. *Nigerian quarterly journal of hospital medicine [Internet]*. 2012; 22(2):[125-9 pp.].
27. Ayodapo AO, Olukokun TAV. Lifestyle counselling and behavioural change: role among adult hypertensives in a rural tertiary institution. *South African Family Practice*. 2019;61(3):91-6.
28. Bobrow K, Farmer AJ, Springer D, Shanyinde M, Yu LM, Brennan T, et al. Mobile Phone Text Messages to Support Treatment Adherence in Adults With High Blood Pressure (SMS-Text Adherence Support [StAR]): A Single-Blind, Randomized Trial. *Circulation*. 2016;133(6):592-600.
29. Bolarinwa OA, Juni MH, Nor Afiah MZ, Salmiah MS, Akande TM. Mid-term impact of home-based follow-up care on health-related quality of life of hypertensive patients at a teaching hospital in Ilorin, Nigeria. *Niger J Clin Pract*. 2019;22(1):69-78.
30. Cappuccio FP, Kerry SM, Micah FB, Plange-Rhule J, Eastwood JB. A community programme to reduce salt intake and blood pressure in Ghana [ISRCTN88789643]. *BMC Public Health*. 2006;6:13.

- 1  
2  
3 31. Charlton KE, Steyn K, Levitt NS, Peer N, Jonathan D, Gogela T,  
4 et al. A food-based dietary strategy lowers blood pressure in a low  
5 socio-economic setting: a randomised study in South Africa.[Erratum  
6 appears in Public Health Nutr. 2009 Feb;12(2):284]. Public Health  
7 Nutrition. 2008;11(12):1397-406.
- 8 32. Fairall LR, Folb N, Timmerman V, Lombard C, Steyn K, Bachmann  
9 MO, et al. Educational Outreach with an Integrated Clinical Tool for  
10 Nurse-Led Non-communicable Chronic Disease Management in Primary Care  
11 in South Africa: A Pragmatic Cluster Randomised Controlled Trial. PLoS  
12 Medicine / Public Library of Science. 2016;13(11):e1002178.
- 13 33. Folb N, Timmerman V, Levitt NS, Steyn K, Bachmann MO, Lund C, et  
14 al. Multimorbidity, control and treatment of noncommunicable diseases  
15 among primary healthcare attenders in the Western Cape, South Africa.  
16 S Afr Med J. 2015;105(8):642-7.
- 17 34. Goudge J, Chirwa T, Eldridge S, Gómez-Olivé FFX, Kabudula C,  
18 Limbani F, et al. Can lay health workers support the management of  
19 hypertension? Findings of a cluster randomised trial in South Africa.  
20 BMJ Glob Health. 2018;3(1):e000577.
- 21 35. Gyamfi J, Plange-Rhule J, Iwelunmor J, Lee D, Blackstone SR,  
22 Mitchell A, et al. Training nurses in task-shifting strategies for the  
23 management and control of hypertension in Ghana: a mixed-methods  
24 study. BMC Health Serv Res. 2017;17(1):104.
- 25 36. Labhardt ND, Balo JR, Ndam M, Manga E, Stoll B. Improved retention  
26 rates with low-cost interventions in hypertension and diabetes  
27 management in a rural African environment of nurse-led care: a cluster-  
28 randomised trial. Tropical Medicine & International Health.  
29 2011;16(10):1276-84.
- 30 37. Lamina S. Effects of continuous and interval training programs  
31 in the management of hypertension: a randomized controlled trial. The  
32 Journal of Clinical Hypertension [Internet]. 2010; 12(11):[841-49  
33 pp.].
- 34 38. Lamina S. Comparative effect of interval and continuous training  
35 programs on serum uric acid in management of hypertension: a randomized  
36 controlled trial. Journal of Strength & Conditioning Research.  
37 2011;25(3):719-26.
- 38 39. Lamina S, Okoye CG. Effect of low intensity continuous training  
39 programme on serum uric acid in the non pharmacological management of  
40 hypertension: a randomized controlled trial. Nigerian journal of  
41 medicine : journal of the national association of resident doctors of  
42 nigeria [Internet]. 2010; 19(1):[77-86 pp.].
- 43 40. Lamina S, Okoye CG. Uricemia as a cardiovascular events risk  
44 factor in hypertension: the role of interval training programme in its  
45 downregulation. Journal of the Association of Physicians of India.  
46 2011;59:23-8.
- 47 41. Lamina S, Okoye CG. Effect of interval training program on white  
48 blood cell count in the management of hypertension: A randomized  
49 controlled study. Nigerian Medical Journal [Internet]. 2011;  
50 52(4):[271-7 pp.].
- 51 42. Lamina S, Okoye CG, Dagogo TT. Managing erectile dysfunction in  
52 hypertension: the effects of a continuous training programme on  
53 biomarker of inflammation. BJU international [Internet]. 2009;  
54 103(9):[1218-21 pp.].
- 55 43. Lamina S, Okoye CG, Dagogo TT. Therapeutic effect of an interval  
56 exercise training program in the management of erectile dysfunction  
57 in hypertensive patients. Journal of clinical hypertension (greenwich,  
58 conn) [Internet]. 2009; 11(3):[125-9 pp.].  
59  
60

- 1  
2  
3 44. Lamina S, Okoye CG, Hanif SM. Randomised controlled trial:  
4 effects of aerobic exercise training programme on indices of adiposity  
5 and metabolic markers in hypertension. *JPMA - Journal of the Pakistan*  
6 *Medical Association*. 2013;63(6):680-7.  
7 45. Lamina S, Okoye CG, Hanif SM. Effects of interval exercise  
8 training programme on the indices of adiposity and biomarker of  
9 inflammation in hypertension: a randomised controlled trial. *Nigerian*  
10 *Postgraduate Medical Journal*. 2014;21(2):136-43.  
11 46. Lamina S, Okoye G. Effects of aerobic exercise training on  
12 psychosocial status and serum uric Acid in men with essential  
13 hypertension: a randomized controlled trial. *Annals of Medical &*  
14 *Health Sciences Research*. 2012;2(2):161-8.  
15 47. Lamina S, Okoye GC. Therapeutic effect of a moderate intensity  
16 interval training program on the lipid profile in men with  
17 hypertension: a randomized controlled trial. *Nigerian journal of*  
18 *clinical practice [Internet]*. 2012; 15(1):[42-7 pp.].  
19 48. Lamina S, Okoye GC. Effect of interval exercise training  
20 programme on C-reactive protein in the non-pharmacological management  
21 of hypertension: a randomized controlled trial. *African journal of*  
22 *medicine and medical sciences [Internet]*. 2012; 41(4):[379-86 pp.].  
23 Available from:  
24 [http://onlinelibrary.wiley.com/o/cochrane/clcentral/articles/365/CN-](http://onlinelibrary.wiley.com/o/cochrane/clcentral/articles/365/CN-00863365/frame.html)  
25 [00863365/frame.html](http://onlinelibrary.wiley.com/o/cochrane/clcentral/articles/365/CN-00863365/frame.html).  
26 49. Leon N, Surender R, Bobrow K, Muller J, Farmer A. Improving  
27 treatment adherence for blood pressure lowering via mobile phone SMS-  
28 messages in South Africa: a qualitative evaluation of the SMS-text  
29 Adherence SuppoRt (StAR) trial. *BMC Family Practice*. 2015;16:80.  
30 50. Maruf FA, Akinpelu AO, Salako BL. Self-reported quality of life  
31 before and after aerobic exercise training in individuals with  
32 hypertension: a randomised-controlled trial. *Applied Psychology Health*  
33 *and Well-being*. 2013;5(2):209-24.  
34 51. Maruf FA, Akinpelu AO, Salako BL, Akinyemi JO. Effects of aerobic  
35 dance training on blood pressure in individuals with uncontrolled  
36 hypertension on two antihypertensive drugs: a randomized clinical  
37 trial. *Journal of the american society of hypertension : JASH*  
38 *[Internet]*. 2016; 10(4):[336-45 pp.].  
39 52. Mendis S, Johnston SC, Fan W, Oladapo O, Cameron A, Faramawi MF.  
40 Cardiovascular risk management and its impact on hypertension control  
41 in primary care in low-resource settings: a cluster-randomized trial.  
42 *Bulletin of the World Health Organization*. 2010;88(6):412-9.  
43 53. Ogedegbe G, Plange-Rhule J, Gyamfi J, Chaplin W, Ntim M, Apusiga  
44 K, et al. Health insurance coverage with or without a nurse-led task  
45 shifting strategy for hypertension control: A pragmatic cluster  
46 randomized trial in Ghana. *PLoS Med*. 2018;15(5):e1002561.  
47 54. Ogedegbe G, Plange-Rhule J, Gyamfi J, Chaplin W, Ntim M, Apusiga  
48 K, et al. A cluster-randomized trial of task shifting and blood  
49 pressure control in Ghana: study protocol. *Implement Sci*. 2014;9:73.  
50 55. Okeahialam B, Ohihoin E, Ajuluchukwu J. Chronotherapy in Nigerian  
51 hypertensives. *Therapeutic Advances in Cardiovascular Disease*.  
52 2011;5(2):113-8.  
53 56. Owolabi MO, Gebregziabher M, Akinyemi RO, Akinyemi JO, Akpa O,  
54 Olaniyan O, et al. Randomized Trial of an Intervention to Improve  
55 Blood Pressure Control in Stroke Survivors. *Circulation Cardiovascular*  
56 *Quality & Outcomes*. 2019;12(12):e005904.  
57 57. Sarfo FS, Ovbiagele B. Stroke minimization through additive anti-  
58 atherosclerotic agents in routine treatment (SMAART): a pilot trial  
59  
60

- 1  
2  
3 concept for improving stroke outcomes in sub-Saharan Africa. *Journal*  
4 *of the neurological sciences* [Internet]. 2017; 377:[167-73 pp.].
- 5 58. Sarfo FS, Treiber F, Gebregziabher M, Adamu S, Nichols M, Singh  
6 A, et al. Phone-based intervention for blood pressure control among  
7 Ghanaian stroke survivors: A pilot randomized controlled trial. *Int J*  
8 *Stroke*. 2019;14(6):630-8.
- 9 59. Sarfo FS, Treiber F, Jenkins C, Patel S, Gebregziabher M, Singh  
10 A, et al. Phone-based Intervention under Nurse Guidance after Stroke  
11 (PINGs): study protocol for a randomized controlled trial. *Trials*.  
12 2016;17(1):436.
- 13 60. Saunders LD, Irwig LM, Gear JS, Ramushu DL. A randomized  
14 controlled trial of compliance improving strategies in Soweto  
15 hypertensives. *Medical Care*. 1991;29(7):669-78.
- 16 61. Stewart A, Noakes T, Eales C, Shepard K, Becker P, Veriawa Y.  
17 Adherence to cardiovascular risk factor modification in patients with  
18 hypertension. *Cardiovascular journal of South Africa* [Internet]. 2005;  
19 16(2):[102-7 pp.].
- 20 62. Steyn K, Lombard C, Gwebushe N, Fourie JM, Everett-Murphy K,  
21 Zwarenstein M, et al. Implementation of national guidelines,  
22 incorporated within structured diabetes and hypertension records at  
23 primary level care in Cape Town, South Africa: a randomised controlled  
24 trial. *Glob Health Action*. 2013;6:20796.
- 25 63. Turkey K, Elnahas N, Oruch R. Effects of exercise training on  
26 postmenopausal hypertension: Implications on nitric oxide levels.  
27 *Medical journal of Malaysia* [Internet]. 2013; 68(6):[459-64 pp.]. 64.
- 28 Vedanthan R, Kamano JH, DeLong AK, Naanyu V, Binanay CA,  
29 Bloomfield GS, et al. Community Health Workers Improve Linkage to  
30 Hypertension Care in Western Kenya. *J Am Coll Cardiol*.  
31 2019;74(15):1897-906.
- 32 65. Vedanthan R, Kamano JH, Naanyu V, DeLong AK, Were MC, Finkelstein  
33 EA, et al. Optimizing linkage and retention to hypertension care in  
34 rural Kenya (LARK hypertension study): study protocol for a randomized  
35 controlled trial. *Trials*. 2014;15:143.
- 36 66. Wahab KW, Owolabi M, Akinyemi R, Jenkins C, Arulogun O, Akpa O,  
37 et al. Short-term pilot feasibility study of a nurse-led intervention  
38 to improve blood pressure control after stroke in Nigeria. *Journal of*  
39 *the Neurological Sciences*. 2017;377:116-20.
- 40 67. Jagannathan R, Patel SA, Ali MK, Narayan KV. Global updates on  
41 cardiovascular disease mortality trends and attribution of traditional  
42 risk factors. *Current diabetes reports*. 2019;19(7):44.
- 43 68. Jeemon P, Gupta R, Onen C, Adler A, Gaziano TA, Prabhakaran D,  
44 et al. Management of hypertension and dyslipidemia for primary  
45 prevention of cardiovascular diseases. Prabhakaran D, Anand S, Gaziano  
46 TA, Mbanya J-C, Nugent R, editors: World Bank Publications; 2017. 444  
47 p.
- 48 69. Noone C, Leahy J, Morrissey EC, Newell J, Newell M, Dwyer CP, et  
49 al. Comparative efficacy of exercise and anti-hypertensive  
50 pharmacological interventions in reducing blood pressure in people  
51 with hypertension: A network meta-analysis. *Eur J Prev Cardiol*.  
52 2020;27(3):247-55.
- 53 70. Burnier M. Drug adherence in hypertension. *Pharmacological*  
54 *Research*. 2017;125:142-9.
- 55 71. GBD. Global, regional, and national age-sex-specific mortality  
56 for 282 causes of death in 195 countries and territories, 1980-2017:  
57 a systematic analysis for the Global Burden of Disease Study 2017.  
58 *Lancet*. 2018;392(10159):1736-88.
- 59  
60



- 1  
2  
3 72. Nielsen JØ, Shrestha AD, Neupane D, Kallestrup P. Non-adherence  
4 to anti-hypertensive medication in low-and middle-income countries: a  
5 systematic review and meta-analysis of 92443 subjects. *Journal of*  
6 *human hypertension*. 2017;31(1):14-21.
- 7 73. Ajiboye RO, Okafor NA, Abiodun IO. Knowledge and Practice of  
8 Lifestyle Modification among Hypertensive Patients in a General  
9 Hospital Lagos. *Indian Journal of Community Health*. 2015;27(1):143-9.
- 10 74. Tedla YG, Bautista LE. Drug Side Effect Symptoms and Adherence  
11 to Antihypertensive Medication. *American Journal of Hypertension*.  
12 2016;29(6):772-9.
- 13 75. Goel MK. Non-Adherence to Anti-Hypertensive Treatment. *Indian*  
14 *Journal of Community Health*. 2020;32(1):126-9.
- 15 76. Xu T, Yu X, Ou S, Liu X, Yuan J, Tan X, et al. Adherence to  
16 Antihypertensive Medications and Stroke Risk: A Dose-Response Meta-  
17 Analysis. *J Am Heart Assoc*. 2017;6(7).
- 18 77. WHO. Noncommunicable diseases country profiles. Licence: CC BY-  
19 NC-SA 3.0 IGO. ed: Geneva: World Health Organization; 2018.
- 20 78. Nieuwlaat R, Wilczynski N, Navarro T, Hobson N, Jeffery R,  
21 Keenanasseril A, et al. Interventions for enhancing medication  
22 adherence. *Cochrane Database of Systematic Reviews*. 2014(11):CD000011.
- 23 79. Ayodele OE, Alebiosu CO, Akinwusi PO, Akinsola A, Mejiuni A.  
24 Target organ damage and associated clinical conditions in newly  
25 diagnosed hypertensives attending a tertiary health facility. *Niger J*  
26 *Clin Pract*. 2007;10(4):319-25.
- 27 80. Seedat YK, Rayner BL, Veriava Y. South African hypertension  
28 practice guideline 2014. *Cardiovasc J Afr*. 2014;25(6):288-94.
- 29 81. Borjesson M, Onerup A, Lundqvist S, Dahlof B. Physical activity  
30 and exercise lower blood pressure in individuals with hypertension:  
31 narrative review of 27 RCTs. *Br J Sports Med*. 2016;50(6):356-61.
- 32 82. Cernota MD. Randomized controlled trials on prevention, diagnosis  
33 and treatment of hypertension in Africa, a systematic review, 2020.
- 34 83. Nations U. World Population Prospects: Available at  
35 <https://population.un.org/wpp/Download/Standard/Population/>:  
36 Department of Economic and Social Affairs, Population Division 2019  
37 [accessed September 21 2020].
- 38 84. Gomez F, Hirbo J, Tishkoff SA. Genetic variation and adaptation  
39 in Africa: implications for human evolution and disease. *Cold Spring*  
40 *Harb Perspect Biol*. 2014;6(7):a008524.
- 41  
42  
43  
44  
45  
46  
47  
48  
49  
50  
51  
52  
53  
54  
55  
56  
57  
58  
59  
60

**Table 1: Inclusion and exclusion criteria**

|                                                                                                                                                                                 |                                                                                                                                                                                     |
|---------------------------------------------------------------------------------------------------------------------------------------------------------------------------------|-------------------------------------------------------------------------------------------------------------------------------------------------------------------------------------|
| Design                                                                                                                                                                          | RCTs conducted in African countries, in international studies with at least 50 % African countries                                                                                  |
| Population                                                                                                                                                                      | African adult patients in secondary and tertiary prevention, diagnosis and treatment of hypertension<br>Exclusion of patients with gestational diabetes, Pre-eclampsia or eclampsia |
| Intervention                                                                                                                                                                    | All non-pharmacological strategies to improve adequate diagnoses, prevention and treatment of hypertension                                                                          |
| Control                                                                                                                                                                         | <ul style="list-style-type: none"> <li>- No intervention</li> <li>- Standard care</li> <li>- Another intervention</li> </ul>                                                        |
| Outcome                                                                                                                                                                         | blood pressure (SBP, DBP, MAP), adherence to recommendations (medications and lifestyle changes) and costs within longest follow-up                                                 |
| Publication                                                                                                                                                                     | Full-text publications according to CONSORT in English or German                                                                                                                    |
| CONSORT: Consolidated Standards of Reporting Trials; DBP: Diastolic blood pressure; MAP: Mean arterial pressure; SBP: Systolic blood pressure, RCT: Randomized controlled trial |                                                                                                                                                                                     |

Table 1: Study characteristics

|                                                      |                      | Participants |                          |                                                | Intervention (IG) vs. Control (CG)                                                                                                                                                                                                        |                       | Results on adherence and blood pressure                                                                                                                                                                                                                                                                                                                                                                                                   |
|------------------------------------------------------|----------------------|--------------|--------------------------|------------------------------------------------|-------------------------------------------------------------------------------------------------------------------------------------------------------------------------------------------------------------------------------------------|-----------------------|-------------------------------------------------------------------------------------------------------------------------------------------------------------------------------------------------------------------------------------------------------------------------------------------------------------------------------------------------------------------------------------------------------------------------------------------|
| Name (design)                                        | Country              | n            | Age (years) /<br>Females | hypertension;<br>SBP /DBP<br>(mmHg)            | Description                                                                                                                                                                                                                               | Follow-up<br>(months) | IG vs. CG; treatment effect (95 %-CI)                                                                                                                                                                                                                                                                                                                                                                                                     |
| <b>Educational strategies for patients (11 RCTs)</b> |                      |              |                          |                                                |                                                                                                                                                                                                                                           |                       |                                                                                                                                                                                                                                                                                                                                                                                                                                           |
| Adeyemo 2013 RCT                                     | Nigeria (mixed)      | 668          | 62.7±10.0 /<br>66 %      | mild to moderate<br>167.4±19.2 /<br>91.8 ±12.3 | home visits by nurses and clinic management (community based, nurse-led treatment program with physician backup; facilitation of clinic visits and health education; use of diuretics and a beta blocker as needed) vs. clinic management | 6                     | <u>excellent adherence</u> (missed ≤2 pills per month): worse in IG: 72.5% vs. 79.0%;<br>OR <sub>a</sub> 0.524 (0.30; 0.75)<br><u>BP control</u> : no difference 65.0 vs. 66.3%;<br>RR 0.98 (0.87;1.11)                                                                                                                                                                                                                                   |
| Ayodapo 2019 RCT                                     | Nigeria (mixed)      | 322          | 60.9±10.0 /<br>51 %      | MAP:<br>106.4±8.3                              | Counselling on lifestyle behaviors (physical activity, fruit and vegetable consumption, alcohol consumption, smoking) over 30-45 minutes, reminders (telephone calls/SMS) vs. usual care                                                  | 3                     | <u>Met recommendations on:</u><br>Physical activity: better in IG: 22.4 vs. 6.2 %; RR 3.60 (1.85;7.00)<br>fruit and vegetable consumption: better in IG: 71.4 vs. 66 %; RR 1.74 (1.41;2.15)<br>alcohol consumption: better in IG: 100 vs. 87.6 %; RR 1.14 (1.08; 1.21)<br>smoking: no difference: 83.9 vs. 78.5 %; RR 1.05 (0.95; 1.17)<br><u>blood pressure:</u><br>MAP: lower in IG: 94.6±8.1 vs. 106.2±7.6 mmHg; MD -9.8 (-11.5; -8.1) |
| Bobrow 2016 (PACTR2014 11000724141) RCT              | South Africa (urban) | 1372         | 54.3±11.5 /<br>72 %      | mild to moderate<br>135.4±17.5<br>83.4±12.1    | mobile phone text messages on behavior change techniques (IG2: interactive with information and possibility to response vs. IG1: only information on hypertension, motivation to take medications and reminders) vs. usual care           | 12                    | <u>adherence</u> (days with medication ≥ 80 %): higher with IG: 59.7 vs. 62.8 vs. 49.4 %; RR 1.12 (1.01;1.23)<br>IG2 vs. CG: OR <sub>a</sub> 1.86 (1.39;2.49)<br>IG1 vs. CG: OR <sub>a</sub> 1.60 (1.20;2.16)<br><u>blood pressure</u> : slightly lower with IG1                                                                                                                                                                          |



|                                            |                  | Participants |                          |                                     | Intervention (IG) vs. Control (CG)                                                                                                                                             |                       | Results on adherence and blood pressure                                                                                                                                                                                                                                                                                                                                                                                                                                                                                                                               |
|--------------------------------------------|------------------|--------------|--------------------------|-------------------------------------|--------------------------------------------------------------------------------------------------------------------------------------------------------------------------------|-----------------------|-----------------------------------------------------------------------------------------------------------------------------------------------------------------------------------------------------------------------------------------------------------------------------------------------------------------------------------------------------------------------------------------------------------------------------------------------------------------------------------------------------------------------------------------------------------------------|
| Name (design)                              | Country          | n            | Age (years) /<br>Females | hypertension;<br>SBP /DBP<br>(mmHg) | Description                                                                                                                                                                    | Follow-up<br>(months) | IG vs. CG; treatment effect (95 %-CI)                                                                                                                                                                                                                                                                                                                                                                                                                                                                                                                                 |
|                                            |                  |              |                          |                                     |                                                                                                                                                                                |                       | SBP: 132.7±17.5 vs. 132.1±16.6 vs. 134.3±17.3 mmHg<br>IG2 vs. CG: MD <sub>a</sub> -1.6 mmHg (-3.7; 0.6)<br>IG1 vs. CG: MD <sub>a</sub> -2.2mmHg (-4.4; -0.04)<br>BP control: slightly better with IG: 65 vs. 65 vs. 58 %<br>IG1 vs. CG: OR <sub>a</sub> 1.42 (1.03; 1.95)<br>IG2 vs. CG: OR <sub>a</sub> 1.41 (1.02; 1.95)                                                                                                                                                                                                                                            |
| Bolarinwa 2019 (PACTR2016 06001671335) RCT | Nigeria (urban)  | 299          | 61.1±10.8 / 77 %         | 140.0 ± 22.9 / 86.9 ±11.9           | task-shifting (driven by trained and professionally competent nurses) home-based follow-up care (BP and BMI monitoring, medical advice and counselling at home) vs. usual care | 12                    | medical adherence: better with IG: low: 4 vs. 16.6%, medium: 17.5 vs. 34.7%, high: 78.5% vs. 48.7%<br>BP control: better with IG: 85.9% vs. 76.7%; RR 1.12 (1.00; 1.25)                                                                                                                                                                                                                                                                                                                                                                                               |
| Labhardt 2011 cluster RCT                  | Cameroon (rural) | 187          | 59.9± 12.5/ 64 %         | mild to moderate 175.8 / 100.7      | reminder letters in case of missing follow-up (IG2) vs. financial incentive (one month free treatment for regular attenders) (IG1) vs. usual care in nurse-led facilities      | 12                    | adherence:<br>retention rate: 60 vs. 65 vs. 29%;<br>lower risk of loss to follow up from the program and better adherence in IG<br>IG2 vs. CG: HR <sub>a</sub> : 0.38 (0.24; 0.61)<br>IG1 vs. CG: HR <sub>a</sub> : 0.44 (0.27; 0.72)<br>adherence (≥ 80 %): 38 vs. 35 vs. 10 %<br>IG2 vs. CG: MD <sub>a</sub> : 28 % (14; 42)<br>IG1 vs. CG: MD <sub>a</sub> : 25 % (13; 37)<br>blood pressure:<br>no differences in SBP in retained patients<br>Costs:<br>In IG1: average monthly cost per patient for antihypertensive medication: 1.1±0.9 €, transport: 1.1±1.0 € |

|                                      |                      | Participants |                           |                                                                                                                                               | Intervention (IG) vs. Control (CG)                                                                                                                                                                                                                                                                                                                                                                                                          |                    | Results on adherence and blood pressure                                                                                                                                                                                                                                 |
|--------------------------------------|----------------------|--------------|---------------------------|-----------------------------------------------------------------------------------------------------------------------------------------------|---------------------------------------------------------------------------------------------------------------------------------------------------------------------------------------------------------------------------------------------------------------------------------------------------------------------------------------------------------------------------------------------------------------------------------------------|--------------------|-------------------------------------------------------------------------------------------------------------------------------------------------------------------------------------------------------------------------------------------------------------------------|
| Name (design)                        | Country              | n            | Age (years) / Females     | hypertension; SBP /DBP (mmHg)                                                                                                                 | Description                                                                                                                                                                                                                                                                                                                                                                                                                                 | Follow-up (months) | IG vs. CG; treatment effect (95 %-CI)                                                                                                                                                                                                                                   |
| Owolabi 2019 (NCT01900756) RCT       | Nigeria (mixed)      | 400#         | 57.2 ± 11.7 / 37 %        | All stroke (n=400); 138.3 ± 23.6 / 83.0 ± 15.2 stroke and uncontrolled hypertension (SBP/DBP>140 /90 mmHg) (n=168) 158.7 ± 21.7 / 92.5 ± 15.6 | chronic care model components of delivery system redesign (increased follow-up visits, pre-appointment phone texts), self-management support (patient report card, post-clinic follow-up phone texts, waiting room educational video) and clinical information systems (patient report card as part of medical chart, hospital registry) vs. standardized usual care (risk factor identification and control) and phone contact information | 12                 | <u>Blood pressure:</u><br>No difference for all patients after stroke:<br>SBP: 136.5±22.3 vs. 136.2±21.2 mmHg<br>patients with uncontrolled hypertension:<br>SBP: 145.1±22.6 vs. 148.5±22.8 mmHg                                                                        |
| Sarfo 2019 (NCT02568137) cluster-RCT | Ghana (urban)        | 60#          | 55 ± 13 / 35 %            | stroke and uncontrolled hypertension; 143.8 ± 26.7 / 90.5 ± 15.7                                                                              | Nurse-led, multilevel approach with m-Health technology for monitoring and reporting BP measurement and tailored motivational text messages vs. usual care                                                                                                                                                                                                                                                                                  | 9                  | <u>adherence:</u><br>modified MMA score: no difference: 13±1.5 vs. 13±1.7<br><u>Blood pressure:</u><br>BP control: no difference: 47 vs. 40 %; OR <sub>a</sub> : 1.24 (0.83; 1.84)<br>SBP<140 mmHg: better in IG: 73 vs. 43 %<br>DBP<90 mmHg: better in CG: 47 vs. 77 % |
| Saunders 1991 RCT                    | South Africa (urban) | 224          | 65 % between 40-50 / 73 % | mild to moderate; n.r. 116.6                                                                                                                  | Reminder letters and home visits by fieldworkers and patient-retained records for self-monitoring of medication compliance and BP control vs. usual care (appointment system and health education)                                                                                                                                                                                                                                          | 6                  | <u>adherence</u> (treatment received) over 6 months:<br>higher for newly treated (135.5±48.9 vs. 95.0±60.0 days) and infrequent attenders (168.4±16.4 vs. 116.7±56.9 days) of 180 days<br>>80 % of treatment: better for newly treated (59 vs. 29 %; p< 0.001) and      |

|                                          |                      | Participants |                           |                                            | Intervention (IG) vs. Control (CG)                                                                                                                                                                    |                    | Results on adherence and blood pressure                                                                                                                                                                                                                                                                                                                                                                                                                                                                     |
|------------------------------------------|----------------------|--------------|---------------------------|--------------------------------------------|-------------------------------------------------------------------------------------------------------------------------------------------------------------------------------------------------------|--------------------|-------------------------------------------------------------------------------------------------------------------------------------------------------------------------------------------------------------------------------------------------------------------------------------------------------------------------------------------------------------------------------------------------------------------------------------------------------------------------------------------------------------|
| Name (design)                            | Country              | n            | Age (years) / Females     | hypertension; SBP /DBP (mmHg)              | Description                                                                                                                                                                                           | Follow-up (months) | IG vs. CG; treatment effect (95 %-CI)                                                                                                                                                                                                                                                                                                                                                                                                                                                                       |
|                                          |                      |              |                           |                                            |                                                                                                                                                                                                       |                    | infrequent attenders (87 vs. 42 %; $p < 0.001$ )<br><u>blood pressure</u> :<br>DBP: lower for newly treated patients (93.4 vs. 100.5 mmHg; MD: 7.1 mmHg (0.5-13.7)), no difference for infrequent attenders: 97.5 vs. 94.7 mmHg; MD: -2.8 mmHg (-6.9; 1.3)                                                                                                                                                                                                                                                  |
| Stewart 2005 RCT                         | South Africa (urban) | 83           | late middle aged/<br>n.r. | all hypertensives; 146.4±18.5<br>93.5±11.1 | telephonic intervention (educational and home-based exercise program + support of a healthcare practitioner and a family member) vs. control group (educational and home-based exercise program only) | 6                  | <u>adherence</u> : better with IG: 62.8 ±34.5% vs. 39.3± 42.8 %; $p=0.007$<br><u>blood pressure</u> : no difference: SBP: 142±16 vs. 144±20 mmHg; MD: -2 mmHg (-10.3 - 6.3)<br>DBP: 92±12 vs. 91±10 mmHg, change: MD: 1 mmHg (-4.0 - 6.0)                                                                                                                                                                                                                                                                   |
| Vedanthan 2019 (NCT01844596) cluster-RCT | Kenya (rural)        | 1460         | 54.2±16.4/<br>58 %        | all hypertensives; 159.4±19.5<br>89.7 ±12  | tailored behavioral communication (smartphone (IG2) or paper-based (IG1)) vs. usual care                                                                                                              | 12                 | <u>adherence</u> (Linkage to care): best results with IG2, worse with IG1:<br>IG2 vs. CG: OR <sub>a</sub> : 1.21 (0.70; 2.01)<br>IG1 vs. CG: OR <sub>a</sub> : 0.64 (0.43; 0.91)<br>IG2 vs. IG1: OR <sub>a</sub> : 1.95 (1.23; 3.01)<br><u>blood pressure</u> : no difference<br>SBP: 149.4±20.8 vs. 150.2±21.6 vs. 150.0±22.9 mmHg, change: -13.1±20.5 vs. -8.4±24.0 vs. -9.7±25.1 mmHg<br>IG2 vs. CG: MD <sub>a</sub> : -2.13 mmHg (-4.89;0.42)<br>IG1 vs. CG: MD <sub>a</sub> : -0.06 mmHg (-3.61; 3.20) |

|                                                                      |                      | Participants |                       |                                                             | Intervention (IG) vs. Control (CG)                                                                                                                                                                                               |                    | Results on adherence and blood pressure                                                                                                                                                                                                                                                                                                                           |
|----------------------------------------------------------------------|----------------------|--------------|-----------------------|-------------------------------------------------------------|----------------------------------------------------------------------------------------------------------------------------------------------------------------------------------------------------------------------------------|--------------------|-------------------------------------------------------------------------------------------------------------------------------------------------------------------------------------------------------------------------------------------------------------------------------------------------------------------------------------------------------------------|
| Name (design)                                                        | Country              | n            | Age (years) / Females | hypertension; SBP /DBP (mmHg)                               | Description                                                                                                                                                                                                                      | Follow-up (months) | IG vs. CG; treatment effect (95 %-CI)                                                                                                                                                                                                                                                                                                                             |
|                                                                      |                      |              |                       |                                                             |                                                                                                                                                                                                                                  |                    | IG2 vs. IG1: MD <sub>a</sub> : -2.07 mmHg (-5.14;1.12)<br>DBP: no difference: 91.3±12.7 vs. 91.0±14.1 vs. 90.1±13.7 mmHg, change: 1.5±12.7 vs. 0.4±15.2 vs. 0.1±14.7 mmHg<br>BP control: no difference:<br>IG2 vs. CG: OR <sub>a</sub> : 0.95 (0.61; 1.38)<br>IG1 vs. CG: OR <sub>a</sub> : 0.97 (0.63; 1.42)<br>IG2 vs. IG1: OR <sub>a</sub> : 1.00 (0.69; 1.40) |
| Wahab 2017 RCT                                                       | Nigeria (urban)      | 35#          | 58.1 ±10.5/ 34 %      | all patients with stroke; 138.3 ± 24.2 85.0 ±12.4           | feasibility of a nurse-led Intervention (education and skill building, BP monitor with review, phone calls) vs. usual care                                                                                                       | 0.5                | <u>adherence</u> : no difference, but improvement in both groups: MMA Score: 7.32±0.93 vs. 7.03±1.36<br><u>Blood pressure</u> : no difference<br>SBP: 137.5±23.0 vs.133.1±18.2 mmHG; MD: 4.40 mmHg (-9.4; 18.2)<br>DBP: 84.1±9.7 vs. 84.2±13.1 mmHg; MD -0.1 mmHg (-7.7; 7.5)                                                                                     |
| <b>Educational strategies for health-care professionals (5 RCTs)</b> |                      |              |                       |                                                             |                                                                                                                                                                                                                                  |                    |                                                                                                                                                                                                                                                                                                                                                                   |
| Fairall 2016 (ISRCTN20283604) cluster-RCT                            | South Africa (rural) | 4393         | 52 (IQR 43-62)/ 73 %  | mild to moderate 139±23.6 <sup>a</sup> 90±13.2 <sup>a</sup> | Education of nurses on NCD care (nurse training in educational outreach sessions with a primary care program to expand their role in NCD care, authorization to prescribe an expanded range of drugs on NCDs) vs. usual training | 14                 | <u>adherence</u> : no difference<br><u>Blood pressure</u> :<br>BP controlled: no difference: 33 vs. 32 %; RR 1.01 (0.2-1.8)                                                                                                                                                                                                                                       |
| Goudge 2018 (ISRCTN12128227) cluster-RCT                             | South Africa (rural) | 4722         | 56.6±19.4 / 56 %      | hypertension: 46.6 %, of them: 53.4%,                       | Support of nurses by health workers (e.g. assistance with booking appointments, retrieve and fill patient files, health education,                                                                                               | 18                 | No hypertension: 50.9% vs. 52.9%<br><u>adherence and blood pressure: no difference</u>                                                                                                                                                                                                                                                                            |

|                                       |                 | Participants |                       |                                                                                              | Intervention (IG) vs. Control (CG)                                                                                                                      |                    | Results on adherence and blood pressure                                                                                                                                                                                                                                                                                                                 |
|---------------------------------------|-----------------|--------------|-----------------------|----------------------------------------------------------------------------------------------|---------------------------------------------------------------------------------------------------------------------------------------------------------|--------------------|---------------------------------------------------------------------------------------------------------------------------------------------------------------------------------------------------------------------------------------------------------------------------------------------------------------------------------------------------------|
| Name (design)                         | Country         | n            | Age (years) / Females | hypertension; SBP / DBP (mmHg)                                                               | Description                                                                                                                                             | Follow-up (months) | IG vs. CG; treatment effect (95 %-CI)                                                                                                                                                                                                                                                                                                                   |
|                                       |                 |              |                       | on treatment and controlled: 8.6%, on treatment and uncontrolled: 9 %, not on treatment 29 % | measurements in the vital signs queue, prepacking of medications, reminders to appointment for patients) to provide chronic disease care vs. usual care |                    | on treatment and controlled: 11.3 vs. 11.2 %<br>on treatment and uncontrolled 13.0 vs. 13.2 %<br>not on treatment 24.9% vs. 22.7%<br>undiagnosed: 24.1 vs. 22.2 %<br>taking medication: 24.3 vs. 24.4 %                                                                                                                                                 |
| Gyamfi 2017 (NCT01802372) cluster-RCT | Ghana (mixed)   | 757          | 58.0±12.4 / 60 %      | mild to moderate 155.9 ± 12.1 / 89.6 ± 10.8                                                  | Training of nurses in task shifting for hypertension control + health insurance coverage vs. health coverage                                            | 12                 | <u>blood pressure</u> : improvement in both groups, but no difference between groups:<br>SBP: 137.1±27.5 vs. 138.4±27.3 mmHg; change: -19.5±18.0 vs. -16.6±17.9 mmHg; MD: -2.9 mmHg (-6.9; 1.0)<br>DBP: 79.8±22.9 vs.81.8±22.8 mmHg; change -9,3±11.5 vs. 8.7±18.7 mmHg; MD -0.6 mmHg (-2.9; 1.7)<br>BP control: 55.2 vs. 49.9 % (MD 5.2 % (-1.8; 12.4) |
| Mendis 2010 cluster-RCT               | Nigeria (mixed) | 1188         | 55 ± 4.7 / 58 %       | mild to moderate 153.2±12.4 94 ± 9.7                                                         | Education of health-care workers and patients with a simple cardiovascular risk management package vs. usual care                                       | 12                 | <u>adherence</u> : higher with IG<br>Attended visits: 90.1 vs. 74.5 %<br>quit smoking: 100 vs. 74.4 % (p=0.023)<br>Increased fruit consumption: 93.4 vs. 18.8 % (p< 0.0001)<br>increased vegetable consumption: 14.2 vs. 7.0 % (p=0.0002)<br><u>blood pressure</u> : higher decrease in IG                                                              |

|                                                                              |                                      | Participants |                          |                                                            | Intervention (IG) vs. Control (CG)                                                                                                                                                               |                       | Results on adherence and blood pressure                                                                                                                                                                          |
|------------------------------------------------------------------------------|--------------------------------------|--------------|--------------------------|------------------------------------------------------------|--------------------------------------------------------------------------------------------------------------------------------------------------------------------------------------------------|-----------------------|------------------------------------------------------------------------------------------------------------------------------------------------------------------------------------------------------------------|
| Name (design)                                                                | Country                              | n            | Age (years) /<br>Females | hypertension;<br>SBP /DBP<br>(mmHg)                        | Description                                                                                                                                                                                      | Follow-up<br>(months) | IG vs. CG; treatment effect (95 %-CI)                                                                                                                                                                            |
|                                                                              |                                      |              |                          |                                                            |                                                                                                                                                                                                  |                       | SBP: -11.0±15.4 vs. -6.6±20.6 mmHg; MD -4.4 mmHg (-6.7; -2.1)<br>DBP: -5.4±10.0 vs. -2.0±13.2 mmHg; MD -3.4 mmHg (-4.9; -1.9)                                                                                    |
| Steyn 2013 (PACTR2013 03000493351) cluster-RCT                               | South Africa (urban)                 | 920          | 60.3±11.1 / 79 %         | all hypertensives <sup>1</sup><br>51.2 ±26.7 / 87.1 ± 12.4 | multi-faced intervention to implement national guidelines (structured record of national guidelines and visits to train clinicians) vs. usual care (passive dissemination) at primary care level | 12                    | <u>Blood pressure</u> : no difference<br>SBP: 161±28.9 vs. 158.2±29.5 mmHg; MD 2.8 mmHg (-1.2; 6.8)<br>DBP: 88.1±13 vs. 87.1±12.6 mmHg; MD 1.00 mmHg (-0.73; 2.73)<br>controlled BP: 23.1 vs. 26 %               |
| <b>Individualized treatment (3 RCTs)</b>                                     |                                      |              |                          |                                                            |                                                                                                                                                                                                  |                       |                                                                                                                                                                                                                  |
| Akintunde 2017 (ISRCTN69440037) RCT {Akintunde, 2017 #4980} (ISRCTN69440037) | Nigeria, Kenya, South Africa (urban) | 105          | 56.6±14.3 / 53 %         | uncontrolled<br>170.9 ± 19.2 / 85.6 ± 21.8                 | physiologically individualized care (guided by their physiological phenotype, based on plasma renin and aldosterone) vs. usual care                                                              | 12                    | <u>blood pressure</u> : lower in IG<br>SBP: 139.4±17.4 vs. 152.6±12.3 mmHg; MD -13.2 mmHg (-19.4; -7.0)<br>DBP: 84.0±11.0 vs. 89.6±7.0 mmHg; MD -5.6 mmHg (-9.4; -1.8)<br>BP control: 50.0 vs. 11.1 % (p=0.0001) |
| Okeahialam 2011 RCT                                                          | Nigeria (urban)                      | 181          | 49.7±14.2 / 61 %         | mild to moderate<br>150.3 ± 14.8 / 93.7 ± 9.6              | chronotherapy: drug intake in the night (10 pm) vs. drug intake in the morning (10 am)                                                                                                           | 3                     | <u>blood pressure</u> : higher decrease in IG<br>SBP: . -18.1±17.9 vs.-14.1±14.7 mmHg; MD -4.0 mmHg (-9.0;1.0)<br>DBP-15.6±12.2 vs.-8.7±10.2 mmHg; MD -6.9 mmHg (-10.4; -3.4)                                    |
| <b>Physical activity (4 RCTs)</b>                                            |                                      |              |                          |                                                            |                                                                                                                                                                                                  |                       |                                                                                                                                                                                                                  |
| Aweto 2012 RCT                                                               | Nigeria (urban)                      | 50           | 45±12.3 / 58 %           | mild to moderate<br>138.7±10.9 /                           | dance movement therapy (50 minutes) vs. educational sessions, both 2x/week over 4 wks                                                                                                            | 1                     | <u>blood pressure</u> : lower in IG<br>SBP: 119.9±8.3 vs. 135.5±11.6 mmHg; MD -15.6 mmHg (-22.4; -8.8)                                                                                                           |

|                                   |                      | Participants |                               |                                                     | Intervention (IG) vs. Control (CG)                                                                                                                                                                                                |                    | Results on adherence and blood pressure                                                                                                                                                   |
|-----------------------------------|----------------------|--------------|-------------------------------|-----------------------------------------------------|-----------------------------------------------------------------------------------------------------------------------------------------------------------------------------------------------------------------------------------|--------------------|-------------------------------------------------------------------------------------------------------------------------------------------------------------------------------------------|
| Name (design)                     | Country              | n            | Age (years) / Females         | hypertension; SBP /DBP (mmHg)                       | Description                                                                                                                                                                                                                       | Follow-up (months) | IG vs. CG; treatment effect (95 %-CI)                                                                                                                                                     |
|                                   |                      |              |                               | 79.9±9.3                                            |                                                                                                                                                                                                                                   |                    | DBP: 70.9±7.2 vs. 74.1±7.7 mmHg; MD -3.2 mmHg (-8.1; 1.7)                                                                                                                                 |
| Lamina 2010 RCT                   | Nigeria (urban)      | 485          | 58.5 ±6.8 / 0 %               | mild to moderate, stable<br>165.4±13.2 / 98.1 ± 4.6 | training programs on bicycle ergometer, 3x/wk, 45-60 minutes: Interval training (IG2) vs. continuous training (IG1) vs. usual care over 8 wks                                                                                     | 2                  | blood pressure: lower in IG<br>SBP: 150.4±16.7 vs. 154.4±12.6 vs.163.5±14.9 mmHg; MD -11.1 mmHg (-14.8; -7.4)<br>DBP: 95±5 vs. 94.4±8.8 vs. 96.1±2.7 mmHg; MD -1.4 mmHg (-2.6; -0.2)      |
| Maruf 2016 (ISRCTN81952488) RCT   | Nigeria (urban)      | 120          | 52.8±8.4 (range 38-65) / 71 % | mild to moderate, 155.7±11.4 / 93±10                | aerobic dance training (3x/wk, 45 minutes) vs. usual care over 12 wks                                                                                                                                                             | 3                  | blood pressure: lower in IG<br>SBP: 135.3±5.6 vs. 142.4±4.7 mmHg; MD: -7.1 mmHg (-9.3; -4.9)<br>DBP: 82.2±3.4 vs. 83.9±2.8 mmHg; MD: -1.7 mmHg (-3.0; -0.4)                               |
| Turky 2013 RCT                    | Egypt (urban)        | 30           | 52.8±2.4, 40-50 / 100 %       | postmeno-pausal hypertensives<br>151±6.2 / 94.5±4.2 | moderate aerobic exercise training (40 minutes, 3x/wk) by walking on a treadmill vs. usual care over 8 wks                                                                                                                        | 2                  | blood pressure: lower in IG<br>SBP: 124±5.6 vs. 145±6.7 mmHg; MD: -21.0 mmHg (-25.8; -16.2)<br>DBP: 85±5.4 vs. 95±3.7 mmHg; MD: -10.0 mmHg (-13.7; -6.3)                                  |
| <b>Modified nutrition (1 RCT)</b> |                      |              |                               |                                                     |                                                                                                                                                                                                                                   |                    |                                                                                                                                                                                           |
| Charlton 2008 RCT                 | South Africa (urban) | 92           | 61.1±7/ 84 %                  | mild to moderate<br>134.6±15.7 / 81.1±8.1           | food-based dietary strategy (modified food, salt replacement, + 500 ml of maas (fermented milk) vs. control (same quantities of the targeted foods of standard commercial composition, 500 ml/d artificially sweetened cooldrink) | 2                  | blood pressure: lower in IG<br>SBP: 132.5±15.8 vs. 127.5±15.8 mmHg; MD <sub>a</sub> :-6.2 mmHg (-11.4; -0.9)<br>DBP: 82.2±9.5 vs. 79.2±11.4 mmHg; MD <sub>a</sub> : -0.6 mmHg (-3.0; 1.8) |

|                                                                                                                                                                                                                                                                                                                                                                                                                                                      |         | Participants |                             |                                     | Intervention (IG) vs. Control (CG) |                       | Results on adherence and blood pressure |
|------------------------------------------------------------------------------------------------------------------------------------------------------------------------------------------------------------------------------------------------------------------------------------------------------------------------------------------------------------------------------------------------------------------------------------------------------|---------|--------------|-----------------------------|-------------------------------------|------------------------------------|-----------------------|-----------------------------------------|
| Name (design)                                                                                                                                                                                                                                                                                                                                                                                                                                        | Country | n            | Age (years)<br>/<br>Females | hypertension;<br>SBP /DBP<br>(mmHg) | Description                        | Follow-up<br>(months) | IG vs. CG; treatment effect (95 %-CI)   |
| # tertiary prevention                                                                                                                                                                                                                                                                                                                                                                                                                                |         |              |                             |                                     |                                    |                       |                                         |
| BMI: body mass index; BP: blood pressure; CG: Control group; DBP: diastolic blood pressure; IG: Intervention group; MD: mean difference; MD <sub>a</sub> : adjusted mean difference; n: number of randomized participants; MMA: Morisky medication adherence; NCD: non-communicable disease; n.r. not reported; ; OR <sub>a</sub> : adjusted odds ratio; RCT: randomized controlled trial; RR: relative risk; SBP: systolic blood pressure; wk: week |         |              |                             |                                     |                                    |                       |                                         |



Table 2: Risk of bias assessment

| Study                         | Sequence generation | Allocation concealment | Blinding of              |                   | Incomplete outcome data | Selective reporting | Other sources |
|-------------------------------|---------------------|------------------------|--------------------------|-------------------|-------------------------|---------------------|---------------|
|                               |                     |                        | personnel / participants | outcome assessors |                         |                     |               |
| <b>Educational strategies</b> |                     |                        |                          |                   |                         |                     |               |
| Adeyemo 2013                  | ☹️                  | ☹️                     | ☹️                       | ☹️                | ☹️                      | ☹️                  | ☹️            |
| Ayodapo 2019                  | ☹️                  | 😊                      | ☹️                       | ☹️                | 😊                       | ☹️                  | 😊             |
| Bobrow 2016                   | 😊                   | 😊                      | ☹️                       | ☹️                | ☹️                      | 😊                   | 😊             |
| Bolarinwa 2019                | 😊                   | 😊                      | ☹️                       | ☹️                | ☹️                      | ☹️                  | ☹️            |
| Fairall 2016                  | 😊                   | 😊                      | ☹️                       | ☹️                | 😊                       | 😊                   | 😊             |
| Goudge 2018                   | 😊                   | 😊                      | ☹️                       | 😊                 | ☹️                      | 😊                   | 😊             |
| Gyamfi 2017                   | 😊                   | 😊                      | ☹️                       | ☹️                | ☹️                      | ☹️                  | 😊             |
| Labhardt 2011                 | 😊                   | 😊                      | ☹️                       | ☹️                | ☹️                      | ☹️                  | 😊             |
| Mendis 2010                   | ☹️                  | ☹️                     | ☹️                       | ☹️                | ☹️                      | ☹️                  | 😊             |
| Owolabi 2019                  | 😊                   | ☹️                     | ☹️                       | 😊                 | 😊                       | ☹️                  | 😊             |
| Sarfo 2019                    | 😊                   | 😊                      | ☹️                       | 😊                 | 😊                       | 😊                   | 😊             |
| Saunders 1991                 | ☹️                  | ☹️                     | ☹️                       | ☹️                | 😊                       | ☹️                  | 😊             |
| Stewart 2005                  | ☹️                  | ☹️                     | ☹️                       | ☹️                | ☹️                      | ☹️                  | 😊             |
| Steyn 2013                    | 😊                   | 😊                      | ☹️                       | ☹️                | 😊                       | 😊                   | 😊             |
| Vedanthan 2019                | ☹️                  | 😊                      | ☹️                       | ☹️                | ☹️                      | 😊                   | ☹️            |
| Wahab 2017                    | 😊                   | 😊                      | ☹️                       | ☹️                | 😊                       | ☹️                  | ☹️            |
| <b>Standardized treatment</b> |                     |                        |                          |                   |                         |                     |               |
| Akintunde 2017                | ☹️                  | ☹️                     | ☹️                       | ☹️                | ☹️                      | 😊                   | ☹️            |
| Okeahialam 2011               | 😊                   | 😊                      | ☹️                       | ☹️                | ☹️                      | ☹️                  | ☹️            |
| <b>Physical activity</b>      |                     |                        |                          |                   |                         |                     |               |
| Aweto 2012                    | ☹️                  | ☹️                     | ☹️                       | ☹️                | ☹️                      | ☹️                  | ☹️            |

| Study                                                                                                                                                                                                                                                                                       | Sequence generation                                                               | Allocation concealment                                                            | Blinding of                                                                       |                                                                                   | Incomplete outcome data                                                            | Selective reporting                                                                 | Other sources                                                                       |
|---------------------------------------------------------------------------------------------------------------------------------------------------------------------------------------------------------------------------------------------------------------------------------------------|-----------------------------------------------------------------------------------|-----------------------------------------------------------------------------------|-----------------------------------------------------------------------------------|-----------------------------------------------------------------------------------|------------------------------------------------------------------------------------|-------------------------------------------------------------------------------------|-------------------------------------------------------------------------------------|
|                                                                                                                                                                                                                                                                                             |                                                                                   |                                                                                   | personnel / participants                                                          | outcome assessors                                                                 |                                                                                    |                                                                                     |                                                                                     |
| Lamina 2010                                                                                                                                                                                                                                                                                 |  |  |  |  |  |  |  |
| Maruf 2016                                                                                                                                                                                                                                                                                  |  |  |  |  |  |  |  |
| Turky 2013                                                                                                                                                                                                                                                                                  |  |  |  |  |  |  |  |
| <b>Modified nutrition</b>                                                                                                                                                                                                                                                                   |                                                                                   |                                                                                   |                                                                                   |                                                                                   |                                                                                    |                                                                                     |                                                                                     |
| Charlton 2008                                                                                                                                                                                                                                                                               |  |  |  |  |  |  |  |
|  : low;  : unclear;  : high risk of bias |                                                                                   |                                                                                   |                                                                                   |                                                                                   |                                                                                    |                                                                                     |                                                                                     |

1  
2  
3  
4  
5  
6  
7  
8  
9  
10  
11  
12  
13  
14  
15  
16  
17  
18  
19  
20  
21  
22  
23  
24  
25  
26  
27  
28  
29  
30  
31  
32  
33  
34  
35  
36  
37  
38  
39  
40  
41  
42  
43  
44  
45  
46  
47  
48  
49  
50  
51  
52  
53  
54  
55  
56  
57  
58  
59  
60

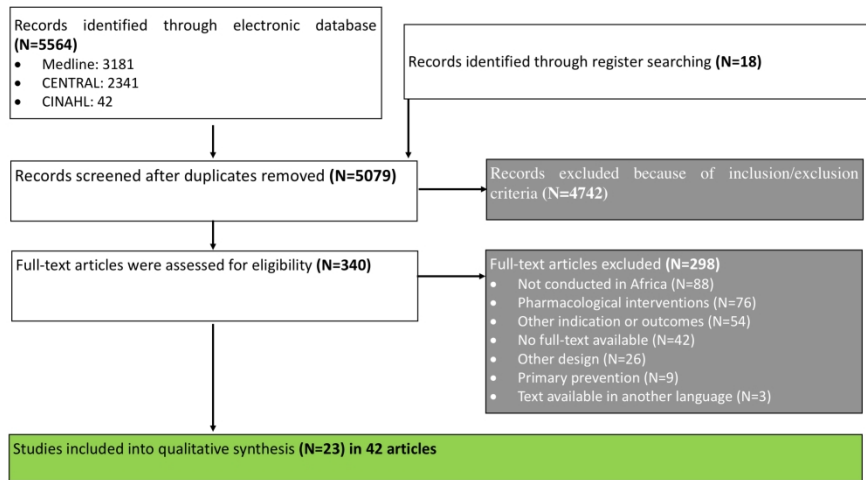

Figure 1: PRISMA flow chart describing the process of study selection

338x190mm (225 x 225 DPI)

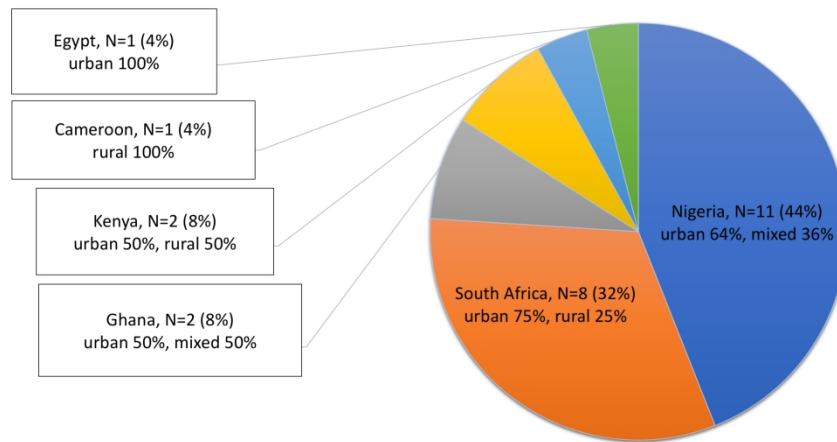

Figure 2: Spatial distribution of countries in which randomized studies were conducted

338x190mm (225 x 225 DPI)

1  
2  
3  
4  
5  
6  
7  
8  
9  
10  
11  
12  
13  
14  
15  
16  
17  
18  
19  
20  
21  
22  
23  
24  
25  
26  
27  
28  
29  
30  
31  
32  
33  
34  
35  
36  
37  
38  
39  
40  
41  
42  
43  
44  
45  
46  
47  
48  
49  
50  
51  
52  
53  
54  
55  
56  
57  
58  
59  
60

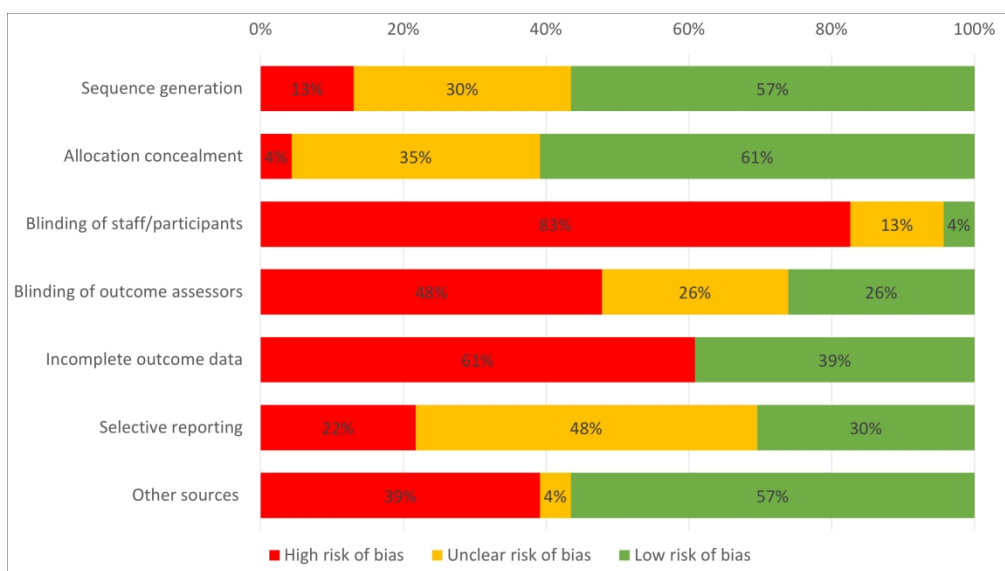

Figure 5: Summary of risk of bias  
338x190mm (225 x 225 DPI)

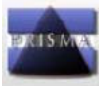

# PRISMA 2009 Checklist

| Section/topic                      | #  | Checklist item                                                                                                                                                                                                                                                                                              | Reported on page #    |
|------------------------------------|----|-------------------------------------------------------------------------------------------------------------------------------------------------------------------------------------------------------------------------------------------------------------------------------------------------------------|-----------------------|
| <b>TITLE</b>                       |    |                                                                                                                                                                                                                                                                                                             |                       |
| Title                              | 1  | Identify the report as a systematic review, meta-analysis, or both.                                                                                                                                                                                                                                         | 1                     |
| <b>ABSTRACT</b>                    |    |                                                                                                                                                                                                                                                                                                             |                       |
| Structured summary                 | 2  | Provide a structured summary including, as applicable: background; objectives; data sources; study eligibility criteria, participants, and interventions; study appraisal and synthesis methods; results; limitations; conclusions and implications of key findings; systematic review registration number. | 2                     |
| <b>INTRODUCTION</b>                |    |                                                                                                                                                                                                                                                                                                             |                       |
| Rationale                          | 3  | Describe the rationale for the review in the context of what is already known.                                                                                                                                                                                                                              | 4                     |
| Objectives                         | 4  | Provide an explicit statement of questions being addressed with reference to participants, interventions, comparisons, outcomes, and study design (PICOS).                                                                                                                                                  | 4,5                   |
| <b>METHODS</b>                     |    |                                                                                                                                                                                                                                                                                                             |                       |
| Protocol and registration          | 5  | Indicate if a review protocol exists, if and where it can be accessed (e.g., Web address), and, if available, provide registration information including registration number.                                                                                                                               | 2,6                   |
| Eligibility criteria               | 6  | Specify study characteristics (e.g., PICOS, length of follow-up) and report characteristics (e.g., years considered, language, publication status) used as criteria for eligibility, giving rationale.                                                                                                      | 6                     |
| Information sources                | 7  | Describe all information sources (e.g., databases with dates of coverage, contact with study authors to identify additional studies) in the search and date last searched.                                                                                                                                  | 6                     |
| Search                             | 8  | Present full electronic search strategy for at least one database, including any limits used, such that it could be repeated.                                                                                                                                                                               | 6, supplementary file |
| Study selection                    | 9  | State the process for selecting studies (i.e., screening, eligibility, included in systematic review, and, if applicable, included in the meta-analysis).                                                                                                                                                   | 6                     |
| Data collection process            | 10 | Describe method of data extraction from reports (e.g., piloted forms, independently, in duplicate) and any processes for obtaining and confirming data from investigators.                                                                                                                                  | 6,7                   |
| Data items                         | 11 | List and define all variables for which data were sought (e.g., PICOS, funding sources) and any assumptions and simplifications made.                                                                                                                                                                       | 7                     |
| Risk of bias in individual studies | 12 | Describe methods used for assessing risk of bias of individual studies (including specification of whether this was done at the study or outcome level), and how this information is to be used in any data synthesis.                                                                                      | 8                     |
| Summary measures                   | 13 | State the principal summary measures (e.g., risk ratio, difference in means).                                                                                                                                                                                                                               | 8                     |

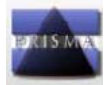

# PRISMA 2009 Checklist

|                      |    |                                                                                                                                                           |   |
|----------------------|----|-----------------------------------------------------------------------------------------------------------------------------------------------------------|---|
| Synthesis of results | 14 | Describe the methods of handling data and combining results of studies, if done, including measures of consistency (e.g., $I^2$ ) for each meta-analysis. | 8 |
|----------------------|----|-----------------------------------------------------------------------------------------------------------------------------------------------------------|---|

Page 1 of 2

| Section/topic                 | #  | Checklist item                                                                                                                                                                                           | Reported on page #             |
|-------------------------------|----|----------------------------------------------------------------------------------------------------------------------------------------------------------------------------------------------------------|--------------------------------|
| Risk of bias across studies   | 15 | Specify any assessment of risk of bias that may affect the cumulative evidence (e.g., publication bias, selective reporting within studies).                                                             | 8                              |
| Additional analyses           | 16 | Describe methods of additional analyses (e.g., sensitivity or subgroup analyses, meta-regression), if done, indicating which were pre-specified.                                                         | 8                              |
| <b>RESULTS</b>                |    |                                                                                                                                                                                                          |                                |
| Study selection               | 17 | Give numbers of studies screened, assessed for eligibility, and included in the review, with reasons for exclusions at each stage, ideally with a flow diagram.                                          | 9                              |
| Study characteristics         | 18 | For each study, present characteristics for which data were extracted (e.g., study size, PICOS, follow-up period) and provide the citations.                                                             | 9                              |
| Risk of bias within studies   | 19 | Present data on risk of bias of each study and, if available, any outcome level assessment (see item 12).                                                                                                | 12, Table 3                    |
| Results of individual studies | 20 | For all outcomes considered (benefits or harms), present, for each study: (a) simple summary data for each intervention group (b) effect estimates and confidence intervals, ideally with a forest plot. | 10,11                          |
| Synthesis of results          | 21 | Present results of each meta-analysis done, including confidence intervals and measures of consistency.                                                                                                  | None done, narrative synthesis |
| Risk of bias across studies   | 22 | Present results of any assessment of risk of bias across studies (see Item 15).                                                                                                                          | 12, Figure 5                   |
| Additional analysis           | 23 | Give results of additional analyses, if done (e.g., sensitivity or subgroup analyses, meta-regression [see Item 16]).                                                                                    | None done                      |
| <b>DISCUSSION</b>             |    |                                                                                                                                                                                                          |                                |
| Summary of evidence           | 24 | Summarize the main findings including the strength of evidence for each main outcome; consider their relevance to key groups (e.g., healthcare providers, users, and policy makers).                     | 13,14, 15                      |
| Limitations                   | 25 | Discuss limitations at study and outcome level (e.g., risk of bias), and at review-level (e.g., incomplete retrieval of identified research, reporting bias).                                            | 15, 16                         |
| Conclusions                   | 26 | Provide a general interpretation of the results in the context of other evidence, and implications for future research.                                                                                  | 17                             |

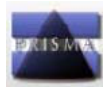

# PRISMA 2009 Checklist

| FUNDING |    |                                                                                                                                            |    |
|---------|----|--------------------------------------------------------------------------------------------------------------------------------------------|----|
| Funding | 27 | Describe sources of funding for the systematic review and other support (e.g., supply of data); role of funders for the systematic review. | 19 |

From: Moher D, Liberati A, Tetzlaff J, Altman DG, The PRISMA Group (2009). Preferred Reporting Items for Systematic Reviews and Meta-Analyses: The PRISMA Statement. PLoS Med 6(7): e1000097. doi:10.1371/journal.pmed1000097

For more information, visit: [www.prisma-statement.org](http://www.prisma-statement.org).

Page 2 of 2

For peer review only



**Adeyemo 2013**

Adeyemo A, Tayo BO, Luke A, Ogedegbe O, Durazo-Arvizu R, Cooper RS. The Nigerian antihypertensive adherence trial: a community-based randomized trial. *Journal of Hypertension*. 2013.

DOI: <https://doi.org/10.1007/s11892-019-1161-2>

**Akintunde 2018**

Akintunde A, Nondi J, Gogo K, Jones ESW, Rayner BL, Hackam DG, et al. Physiological Phenotyping for Personalized Therapy of Uncontrolled Hypertension in Africa. *Am J Hypertens*. 2017.

DOI: <https://doi.org/10.1093/ajh/hpx066>

**Aweto 2012**

Aweto HA, Owwoye OB, Akinbo SR, Onabajo AA. Effects of dance movement therapy on selected cardiovascular parameters and estimated maximum oxygen consumption in hypertensive patients. *Nigerian Quarterly Journal of Hospital Medicine*. 2012.

PMID: <https://europepmc.org/article/med/23175912>

**Ayodapo 2019**

Ayodapo AO, Olukokun TAV. Lifestyle counselling and behavioural change: role among adult hypertensives in a rural tertiary institution. *South African Family Practice*. 2019.

DOI: <https://doi.org/10.1080/20786190.2019.1569453>

**Bobrow 2016**

Bobrow K, Farmer AJ, Springer D, Shanyinde M, Yu LM, Brennan T, et al. Mobile Phone Text Messages to Support Treatment Adherence in Adults With High Blood Pressure (SMS-Text Adherence Support [StAR]): A Single-Blind, Randomized Trial. *Circulation*. 2016.

DOI: <https://doi.org/10.1161/CIRCULATIONAHA.115.017530>

Leon N, Surender R, Bobrow K, Muller J, Farmer A. Improving treatment adherence for blood pressure lowering via mobile phone SMS-messages in South Africa: a qualitative evaluation of the SMS-text Adherence Support (StAR) trial. *BMC Family Practice*. 2015.

DOI: <https://doi.org/10.1186/s12875-015-0289-7>

**Bolarinwa 2019**

Bolarinwa OA, Juni MH, Nor Afiah MZ, Salmiah MS, Akande TM. Mid-term impact of home-based follow-up care on health-related quality of life of hypertensive patients at a teaching hospital in Ilorin, Nigeria. *Niger J Clin Pract*. 2019.

PMID: <https://europepmc.org/article/med/30666023>

**Cappuccio 2006**

Cappuccio FP, Kerry SM, Micah FB, Plange-Rhule J, Eastwood JB. A community programme to reduce salt intake and blood pressure in Ghana. *BMC Public Health*. 2006.

1  
2  
3 DOI: <https://doi.org/10.1186/1471-2458-6-13>  
4  
5

#### 6 **Charlton 2009**

7  
8 Charlton KE, Steyn K, Levitt NS, Peer N, Jonathan D, Gogela T, et al. A food-based dietary strategy  
9 lowers blood pressure in a low socio-economic setting: a randomised study in South Africa. Public  
10 Health Nutrition. 2008.  
11

12 DOI: <https://doi.org/10.1017/S136898000800342X>  
13  
14

#### 15 **Fairall 2016**

16 Fairall LR, Folb N, Timmerman V, Lombard C, Steyn K, Bachmann MO, et al. Educational Outreach  
17 with an Integrated Clinical Tool for Nurse-Led Non-communicable Chronic Disease Management in  
18 Primary Care in South Africa: A Pragmatic Cluster Randomised Controlled Trial. PLoS Medicine /  
19 Public Library of Science. 2016.  
20

21 DOI: <https://doi.org/10.1371/journal.pmed.1002178>  
22

23 Folb N, Timmerman V, Levitt NS, Steyn K, Bachmann MO, Lund C, et al. Multimorbidity, control and  
24 treatment of noncommunicable diseases among primary healthcare attenders in the Western Cape,  
25 South Africa. S Afr Med J. 2015.  
26

27 DOI: <http://dx.doi.org/10.7196/SAMJNEW.7882>  
28  
29

#### 30 **Goudge 2018**

31 Goudge J, Chirwa T, Eldridge S, Gómez-Olivé FXF, Kabudula C, Limbani F, et al. Can lay health workers  
32 support the management of hypertension? Findings of a cluster randomised trial in South Africa. BMJ  
33 Glob Health. 2018.  
34

35 DOI: <https://doi.org/10.1136/bmjgh-2017-000577>  
36  
37

#### 38 **Gyamfi 2017**

39 Gyamfi J, Plange-Rhule J, Iwelunmor J, Lee D, Blackstone SR, Mitchell A, et al. Training nurses in task-  
40 shifting strategies for the management and control of hypertension in Ghana: a mixed-methods  
41 study. BMC Health Serv Res. 2017.  
42

43 DOI: <https://doi.org/10.1186/s12913-017-2026-5>  
44  
45

46 Ogedegbe G, Plange-Rhule J, Gyamfi J, Chaplin W, Ntim M, Apusiga K, et al. Health insurance  
47 coverage with or without a nurse-led task shifting strategy for hypertension control: A pragmatic  
48 cluster randomized trial in Ghana. PLoS Med. 2018.  
49

50 DOI: <https://doi.org/10.1371/journal.pmed.1002561>  
51  
52

53 Ogedegbe G, Plange-Rhule J, Gyamfi J, Chaplin W, Ntim M, Apusiga K, et al. A cluster-randomized trial  
54 of task shifting and blood pressure control in Ghana: study protocol. Implement Sci. 2014.  
55

56 DOI: <https://doi.org/10.1186/1748-5908-9-73>  
57  
58

#### 59 **Labhardt 2011**

60

1  
2  
3 Labhardt ND, Balo JR, Ndam M, Manga E, Stoll B. Improved retention rates with low-cost  
4 interventions in hypertension and diabetes management in a rural African environment of nurse-led  
5 care: a cluster-randomised trial. *Tropical Medicine & International Health*. 2011.

6  
7 DOI: <https://doi.org/10.1111/j.1365-3156.2011.02827.x>  
8  
9

### 10 **Lamina 2010**

11  
12 Lamina S. Effects of continuous and interval training programs in the management of hypertension: a  
13 randomized controlled trial. *Journal of clinical hypertension*. 2010.

14  
15 DOI: <https://doi.org/10.1111/j.1751-7176.2010.00315.x>  
16  
17

18 Lamina S. Comparative effect of interval and continuous training programs on serum uric acid in  
19 management of hypertension: a randomized controlled trial. *Journal of Strength & Conditioning*  
20 *Research*. 2011.

21  
22 PMID: <https://www.ncbi.nlm.nih.gov/pubmed/20574413>  
23  
24

25 Lamina S, Okoye CG. Effect of low intensity continuous training programme on serum uric acid in the  
26 non pharmacological management of hypertension: a randomized controlled trial. *Nigerian journal of*  
27 *medicine : journal of the national association of resident doctors of nigeria*. 2010.

28  
29 PMID: <https://pubmed.ncbi.nlm.nih.gov/23672102/>  
30  
31

32 Lamina S, Okoye CG. Uricaemia as a cardiovascular events risk factor in hypertension: the role of  
33 interval training programme in its downregulation. *Journal of the Association of Physicians of India*.  
34 2011.

35  
36 PMID: <https://pubmed.ncbi.nlm.nih.gov/21751661/>  
37  
38

39 Lamina S, Okoye CG. Effect of interval training program on white blood cell count in the management  
40 of hypertension: A randomized controlled study. *Nigerian Medical Journal*. 2011.

41  
42 PMID: <https://pubmed.ncbi.nlm.nih.gov/22529513/>  
43  
44

45 Lamina S, Okoye CG, Dagogo TT. Managing erectile dysfunction in hypertension: the effects of a  
46 continuous training programme on biomarker of inflammation. *BJU international*. 2009.

47  
48 DOI: <https://doi.org/10.1111/j.1464-410X.2008.08254.x>  
49  
50

51 Lamina S, Okoye CG, Dagogo TT. Therapeutic effect of an interval exercise training program in the  
52 management of erectile dysfunction in hypertensive patients. *Journal of clinical hypertension*  
53 *(greenwich, conn) [Internet]*. 2009.

54  
55 DOI: <https://doi.org/10.1111/j.1751-7176.2009.00086.x>  
56  
57

58 Lamina S, Okoye CG, Hanif SM. Randomised controlled trial: effects of aerobic exercise training  
59 programme on indices of adiposity and metabolic markers in hypertension. *JPMA - Journal of the*  
60 *Pakistan Medical Association*. 2013.

1  
2  
3 PMID: <https://pubmed.ncbi.nlm.nih.gov/23901664/>  
4  
5

6 Lamina S, Okoye CG, Hanif SM. Effects of interval exercise training programme on the indices of  
7 adiposity and biomarker of inflammation in hypertension: a randomised controlled trial. Nigerian  
8 Postgraduate Medical Journal. 2014.  
9

10 PMID: <https://pubmed.ncbi.nlm.nih.gov/25126867/>  
11  
12

13 Lamina S, Okoye G. Effects of aerobic exercise training on psychosocial status and serum uric Acid in  
14 men with essential hypertension: a randomized controlled trial. Annals of Medical & Health Sciences  
15 Research. 2012.  
16

17 PMID: <https://pubmed.ncbi.nlm.nih.gov/23439606/>  
18  
19

20 Lamina S, Okoye GC. Therapeutic effect of a moderate intensity interval training program on the lipid  
21 profile in men with hypertension: a randomized controlled trial. Nigerian journal of clinical practice.  
22 2012.  
23

24 PMID: <https://pubmed.ncbi.nlm.nih.gov/22437088/>  
25  
26

27 Lamina S, Okoye GC. Effect of interval exercise training programme on C-reactive protein in the non-  
28 pharmacological management of hypertension: a randomized controlled trial. African journal of  
29 medicine and medical sciences. 2012.  
30

31 PMID: <https://pubmed.ncbi.nlm.nih.gov/23672102/>  
32  
33

### 34 **Maruf 2013**

35 Maruf FA, Akinpelu AO, Salako BL. Self-reported quality of life before and after aerobic exercise  
36 training in individuals with hypertension: a randomised-controlled trial. Applied Psychology Health  
37 and Well-being. 2013.  
38

39 DOI: <https://doi.org/10.1111/aphw.12005>  
40  
41

42 Maruf FA, Akinpelu AO, Salako BL, Akinyemi JO. Effects of aerobic dance training on blood pressure in  
43 individuals with uncontrolled hypertension on two antihypertensive drugs: a randomized clinical trial.  
44 Journal of the american society of hypertension. 2016.  
45

46 DOI: <https://doi.org/10.1016/j.jash.2016.02.002>  
47  
48

### 49 **Mendis 2010**

50 Mendis S, Johnston SC, Fan W, Oladapo O, Cameron A, Faramawi MF. Cardiovascular risk  
51 management and its impact on hypertension control in primary care in low-resource settings: a  
52 cluster-randomized trial. Bulletin of the World Health Organization. 2010.  
53

54 PMID: <https://www.ncbi.nlm.nih.gov/pmc/articles/PMC2878142/>  
55  
56

### 57 **Okeahialam 2011**

58 Okeahialam B, Ohihoin E, Ajuluchukwu J. Chronotherapy in Nigerian hypertensives. Therapeutic  
59 Advances in Cardiovascular Disease. 2011;5(2):113-8.  
60

1  
2  
3 DOI: <https://doi.org/10.1177%2F1753944711402119>  
4  
5

6 **Owolabi 2019**

7  
8 Owolabi MO, Gebregziabher M, Akinyemi RO, Akinyemi JO, Akpa O, Olaniyan O, et al. Randomized  
9 Trial of an Intervention to Improve Blood Pressure Control in Stroke Survivors. *Circulation*  
10 *Cardiovascular Quality & Outcomes*. 2019.

11 DOI: <https://doi.org/10.1161/CIRCOUTCOMES.119.005904>  
12  
13

14 **Sarfo 2019**

15  
16 Sarfo FS, Ovbiagele B. Stroke minimization through additive anti-atherosclerotic agents in routine  
17 treatment (SMAART): a pilot trial concept for improving stroke outcomes in sub-Saharan Africa.  
18 *Journal of the neurological sciences*. 2017.

19 DOI: <https://doi.org/10.1016/j.jns.2017.04.012>  
20  
21

22  
23 Sarfo FS, Treiber F, Gebregziabher M, Adamu S, Nichols M, Singh A, et al. Phone-based intervention  
24 for blood pressure control among Ghanaian stroke survivors: A pilot randomized controlled trial. *Int J*  
25 *Stroke*. 2019.

26 DOI: <https://doi.org/10.1177%2F1747493018816423>  
27  
28

29  
30 Sarfo FS, Treiber F, Jenkins C, Patel S, Gebregziabher M, Singh A, et al. Phone-based Intervention  
31 under Nurse Guidance after Stroke (PINGS): study protocol for a randomized controlled trial. *Trials*.  
32 2016.

33 DOI: <https://doi.org/10.1186/s13063-016-1557-0>  
34  
35

36  
37 **Saunders 1991**

38  
39 Saunders LD, Irwig LM, Gear JS, Ramushu DL. A randomized controlled trial of compliance improving  
40 strategies in Soweto hypertensives. *Medical Care*. 1991.

41 PMID: <https://pubmed.ncbi.nlm.nih.gov/2072772/>  
42  
43

44  
45 **Stewart 2005**

46  
47 Stewart A, Noakes T, Eales C, Shepard K, Becker P, Veriawa Y. Adherence to cardiovascular risk factor  
48 modification in patients with hypertension. *Cardiovascular journal of South Africa*. 2005

49 PMID: <https://pubmed.ncbi.nlm.nih.gov/15915277/>  
50  
51

52  
53 **Steyn 2013**

54  
55 Steyn K, Lombard C, Gwebushe N, Fourie JM, Everett-Murphy K, Zwarenstein M, et al.  
56 Implementation of national guidelines, incorporated within structured diabetes and hypertension  
57 records at primary level care in Cape Town, South Africa: a randomised controlled trial. *Glob Health*  
58 *Action*. 2013.

59 DOI: <http://dx.doi.org/10.3402/gha.v6i0.20796>  
60

**Turky 2013**

Turky K, Elnahas N, Oruch R. Effects of exercise training on postmenopausal hypertension: Implications on nitric oxide levels. Medical journal of Malaysia [Internet]. 2013.

PMID: <https://pubmed.ncbi.nlm.nih.gov/24632913/>

**Vedanthan 2019**

Vedanthan R, Kamano JH, DeLong AK, Naanyu V, Binanay CA, Bloomfield GS, et al. Community Health Workers Improve Linkage to Hypertension Care in Western Kenya. J Am Coll Cardiol. 2019.

DOI: <https://doi.org/10.1016/j.jacc.2019.08.003>

Vedanthan R, Kamano JH, Naanyu V, DeLong AK, Were MC, Finkelstein EA, et al. Optimizing linkage and retention to hypertension care in rural Kenya (LARK hypertension study): study protocol for a randomized controlled trial. Trials. 2014.

DOI: <https://doi.org/10.1186/1745-6215-15-143>

**Wahab 2017**

Wahab KW, Owolabi M, Akinyemi R, Jenkins C, Arulogun O, Akpa O, et al. Short-term pilot feasibility study of a nurse-led intervention to improve blood pressure control after stroke in Nigeria. Journal of the Neurological Sciences. 2017.

DOI: <https://doi.org/10.1016/j.jns.2017.04.005>

## Search strategies

### Medline (Ovid): Search on CVDs

| Nr.               | Searches (24th July 2017)                  | Results |
|-------------------|--------------------------------------------|---------|
| <b>Indication</b> |                                            |         |
| 1.                | exp heart diseases/                        |         |
| 2.                | exp vascular diseases/                     |         |
| 3.                | cerebrovascular disorders/                 |         |
| 4.                | exp brain ischemia/                        |         |
| 5.                | exp carotid artery diseases/               |         |
| 6.                | exp dementia, vascular/                    |         |
| 7.                | exp intracranial arterial diseases/        |         |
| 8.                | exp intracranial embolism/ and thrombosis/ |         |
| 9.                | exp intracranial hemorrhages/              |         |
| 10.               | exp stroke/                                |         |
| 11.               | exp hyperlipidemias/                       |         |
| 12.               | Exp hypercholesteremia/                    |         |
| 13.               | exp Myocardial Ischemia/                   |         |
| 14.               | angina.tw                                  |         |
| 15.               | (heart adj3 disease\$.tw.                  |         |
| 16.               | (coronary adj3 disease\$.tw.               |         |
| 17.               | (peripheral adj3 disease\$.tw.             |         |
| 18.               | (cerebrovascular disease).tw               |         |
| 19.               | Renal artery stenosis.tw                   |         |
| 20.               | (Aortic aneurism or Aneurysm\$.tw          |         |
| 21.               | myocardial infarct\$.tw.                   |         |
| 22.               | exp Myocardial Revascularization/          |         |
| 23.               | (coronary adj3 bypass\$.tw.                |         |
| 24.               | (coronary adj3 angioplast\$.tw.            |         |
| 25.               | (heart adj3 infarct\$.tw.                  |         |
| 26.               | postmyocardial infarct\$.tw.               |         |
| 27.               | cardiovascular diseases/                   |         |
| 28.               | Hypertens\$.tw                             |         |
| 29.               | (high adj2 blood pressure).tw              |         |
| 30.               | (blood pressure control).tw                |         |
| 31.               | Hypertensive heart disease.tw.             |         |
| 32.               | Cardiomyopath\$.tw.                        |         |
| 33.               | Heart failure.tw.                          |         |

| Nr.                                 | Searches (24th July 2017)                                           | Results   |
|-------------------------------------|---------------------------------------------------------------------|-----------|
| 34.                                 | (Pulmonary heart disease).tw                                        |           |
| 35.                                 | Cardiac dysrhythmia*.tw.                                            |           |
| 36.                                 | Inflammatory heart disease.tw.                                      |           |
| 37.                                 | Endocarditis.tw.                                                    |           |
| 38.                                 | Cardiomegaly.tw                                                     |           |
| 39.                                 | Valvular heart disease.tw.                                          |           |
| 40.                                 | Rheumatic heart disease.tw                                          |           |
| 41.                                 | Myocarditis.tw                                                      |           |
| 42.                                 | Arrhythmi\$.tw                                                      |           |
| 43.                                 | Vasculitis.tw                                                       |           |
| 44.                                 | or/1-43                                                             | 2 498 192 |
| <b>Africa and African countries</b> |                                                                     |           |
| 45.                                 | Africa.tw                                                           |           |
| 46.                                 | Exp Africa/                                                         |           |
| 47.                                 | Algeria\$.tw or exp Algeria/                                        |           |
| 48.                                 | Angol\$.tw or exp Angola/                                           |           |
| 49.                                 | Benin\$.tw or exp Benin/                                            |           |
| 50.                                 | Botswan\$.tw or exp Botswana/                                       |           |
| 51.                                 | Burkina Faso.tw or exp Burkina Faso/                                |           |
| 52.                                 | Burund\$.tw or exp Burundi/                                         |           |
| 53.                                 | Cameroon\$.tw or exp Cameroon/                                      |           |
| 54.                                 | Cape Verde.tw or exp Cape Verde/                                    |           |
| 55.                                 | Central African Republic\$.tw or exp Central African Republic/      |           |
| 56.                                 | Chad\$.tw or exp Chad/                                              |           |
| 57.                                 | Comoros\$.tw or exp Comoros/                                        |           |
| 58.                                 | Cote d'Ivoire.tw or exp Cote d'Ivoire/                              |           |
| 59.                                 | Democratic Republic of Congo.tw or exp Democratic Republic of Congo |           |
| 60.                                 | Djibout\$.tw or exp Djibouti/                                       |           |
| 61.                                 | Egypt\$.tw or exp Egypt/                                            |           |
| 62.                                 | Equatorial Guinea\$.tw or exp Equatorial Guinea/                    |           |
| 63.                                 | Eritrea\$.tw or exp Eritrea/                                        |           |
| 64.                                 | Ethiop\$.tw or exp Ethiopia/                                        |           |
| 65.                                 | Gabon\$.tw or exp Gabon/                                            |           |
| 66.                                 | Gambia\$.tw or exp Gambia/                                          |           |
| 67.                                 | Ghana\$.tw or exp Ghana/                                            |           |
| 68.                                 | Guinea\$.tw or exp Guinea/                                          |           |
| 69.                                 | Guinea-Bissau.tw or exp Guinea-Bissau/                              |           |



| Nr.                 | Searches (24th July 2017)                | Results |
|---------------------|------------------------------------------|---------|
| 70.                 | Kenya\$.tw or exp Kenya/                 |         |
| 71.                 | Lesoth\$.tw or exp Lesotho/              |         |
| 72.                 | Liberia\$.tw or exp Liberia/             |         |
| 73.                 | Libya\$.tw or exp Libya/                 |         |
| 74.                 | Madagascar\$.tw or exp Madagascar/       |         |
| 75.                 | Malawi\$.tw or exp Malawi/               |         |
| 76.                 | Mali.tw or exp Mali/                     |         |
| 77.                 | Mauritania\$.tw or exp Mauritania/       |         |
| 78.                 | Mauritius\$.tw or exp Mauritius/         |         |
| 79.                 | Morocc\$.tw or exp Morocco/              |         |
| 80.                 | Mozambique\$.tw or exp Mozambique/       |         |
| 81.                 | Namibia\$.tw or exp Namibia/             |         |
| 82.                 | Niger.tw or exp Niger/                   |         |
| 83.                 | Nigeria\$.tw or exp Nigeria/             |         |
| 84.                 | Rwanda\$.tw or exp Rwanda/               |         |
| 85.                 | (Sao Tome and Principe).tw               |         |
| 86.                 | Senegal\$.tw or exp Senegal/             |         |
| 87.                 | Seychell\$.tw                            |         |
| 88.                 | Sierra Leone.tw or exp Sierra Leone/     |         |
| 89.                 | Somalia\$.tw or exp Somalia/             |         |
| 90.                 | South Africa\$.tw or exp South Africa.de |         |
| 91.                 | South Sudan.tw or exp South Sudan/       |         |
| 92.                 | Sudan\$.tw or exp Sudan/                 |         |
| 93.                 | Swaziland\$.tw or exp Swaziland/         |         |
| 94.                 | Tanzania\$.tw or exp Tanzania/           |         |
| 95.                 | Togo\$.tw or exp Togo/                   |         |
| 96.                 | Tunisia\$.tw or exp Tunisia/             |         |
| 97.                 | Uganda\$.tw or exp Uganda/               |         |
| 98.                 | Zambia\$.tw or exp Zambia/               |         |
| 99.                 | Zimbabwe\$.tw or exp Zimbabwe/           |         |
| 100.                | Somaliland\$.tw or exp Somaliland/       |         |
| 101.                | #1.tw                                    |         |
| 102.                | or/45-101                                | 436 084 |
| 103.                | 44 and 102                               | 19 017  |
| <b>Study design</b> |                                          |         |
| 104.                | randomized controlled trial.pt.          |         |
| 105.                | controlled clinical trial.pt.            |         |

| Nr.  | Searches (24th July 2017)   | Results     |
|------|-----------------------------|-------------|
| 106. | randomized.ab.              |             |
| 107. | placebo.ab.                 |             |
| 108. | randomly.ab.                |             |
| 109. | trial.ab.                   |             |
| 110. | groups.ab.                  |             |
| 111. | or/104-110                  | 2 535 560   |
| 112. | exp animals/ not humans.sh. |             |
| 113. | 111 not 112                 | 2 133 129   |
| 114. | 103 and 113                 | <b>2643</b> |

### Medline (Ovid): Update on hypertension

| Nr.                                 | Searches (23th June 2020)                                           | Results |
|-------------------------------------|---------------------------------------------------------------------|---------|
| <b>Indication</b>                   |                                                                     |         |
| 1.                                  | Exp hypertension                                                    |         |
| 2.                                  | Hypertens\$.ti,ab                                                   |         |
| 3.                                  | (high adj2 blood pressure).ti,ab                                    |         |
| 4.                                  | (blood pressure control).ti,ab                                      |         |
| 5.                                  | or/1-4                                                              | 464 555 |
| <b>Africa and African countries</b> |                                                                     |         |
| 6.                                  | Africa.tw                                                           |         |
| 7.                                  | Exp Africa/                                                         |         |
| 8.                                  | Algeria\$.tw or exp Algeria/                                        |         |
| 9.                                  | Angol\$.tw or exp Angola/                                           |         |
| 10.                                 | Benin\$.tw or exp Benin/                                            |         |
| 11.                                 | Botswan\$.tw or exp Botswana/                                       |         |
| 12.                                 | Burkina Faso.tw or exp Burkina Faso/                                |         |
| 13.                                 | Burund\$.tw or exp Burundi/                                         |         |
| 14.                                 | Cameroon\$.tw or exp Cameroon/                                      |         |
| 15.                                 | Cape Verde.tw or exp Cape Verde/                                    |         |
| 16.                                 | Central African Republic\$.tw or exp Central African Republic/      |         |
| 17.                                 | Chad\$.tw or exp Chad/                                              |         |
| 18.                                 | Comoros\$.tw or exp Comoros/                                        |         |
| 19.                                 | Cote d'Ivoire.tw or exp Cote d'Ivoire/                              |         |
| 20.                                 | Democratic Republic of Congo.tw or exp Democratic Republic of Congo |         |
| 21.                                 | Djibout\$.tw or exp Djibouti/                                       |         |

| Nr. | Searches (23th June 2020)                        | Results |
|-----|--------------------------------------------------|---------|
| 22. | Egypt\$.tw or exp Egypt/                         |         |
| 23. | Equatorial Guinea\$.tw or exp Equatorial Guinea/ |         |
| 24. | Eritrea\$.tw or exp Eritrea/                     |         |
| 25. | Ethiop\$.tw or exp Ethiopia/                     |         |
| 26. | Gabon\$.tw or exp Gabon/                         |         |
| 27. | Gambia\$.tw or exp Gambia/                       |         |
| 28. | Ghana\$.tw or exp Ghana/                         |         |
| 29. | Guinea\$.tw or exp Guinea/                       |         |
| 30. | Guinea-Bissau.tw or exp Guinea-Bissau/           |         |
| 31. | Kenya\$.tw or exp Kenya/                         |         |
| 32. | Lesoth\$.tw or exp Lesotho/                      |         |
| 33. | Liberia\$.tw or exp Liberia/                     |         |
| 34. | Libya\$.tw or exp Libya/                         |         |
| 35. | Madagascar\$.tw or exp Madagascar/               |         |
| 36. | Malawi\$.tw or exp Malawi/                       |         |
| 37. | Mali.tw or exp Mali/                             |         |
| 38. | Mauritania\$.tw or exp Mauritania/               |         |
| 39. | Mauritius\$.tw or exp Mauritius/                 |         |
| 40. | Morocc\$.tw or exp Morocco/                      |         |
| 41. | Mozambique\$.tw or exp Mozambique/               |         |
| 42. | Namibia\$.tw or exp Namibia/                     |         |
| 43. | Niger.tw or exp Niger/                           |         |
| 44. | Nigeria\$.tw or exp Nigeria/                     |         |
| 45. | Rwanda\$.tw or exp Rwanda/                       |         |
| 46. | (Sao Tome and Principe).tw                       |         |
| 47. | Senegal\$.tw or exp Senegal/                     |         |
| 48. | Seychell\$.tw                                    |         |
| 49. | Sierra Leone.tw or exp Sierra Leone/             |         |
| 50. | Somalia\$.tw or exp Somalia/                     |         |
| 51. | South Africa\$.tw or exp South Africa.de         |         |
| 52. | South Sudan.tw or exp South Sudan/               |         |
| 53. | Sudan\$.tw or exp Sudan/                         |         |
| 54. | Swaziland\$.tw or exp Swaziland/                 |         |
| 55. | Tanzania\$.tw or exp Tanzania/                   |         |
| 56. | Togo\$.tw or exp Togo/                           |         |
| 57. | Tunisia\$.tw or exp Tunisia/                     |         |
| 58. | Uganda\$.tw or exp Uganda/                       |         |

| Nr.                 | Searches (23th June 2020)                    | Results    |
|---------------------|----------------------------------------------|------------|
| 59.                 | Zambia\$.tw or exp Zambia/                   |            |
| 60.                 | Zimbabwe\$.tw or exp Zimbabwe/               |            |
| 61.                 | Somaliland\$.tw or exp Somaliland/           |            |
| 62.                 | Sahrawi Arab Democratic Republic.tw.         |            |
| 63.                 | or/6-62                                      | 530 370    |
| <b>Study design</b> |                                              |            |
| 64.                 | randomized controlled trial.pt.              |            |
| 65.                 | controlled clinical trial.pt.                |            |
| 66.                 | (randomized or randomised or randomly).ti,ab |            |
| 67.                 | placebo.ab.                                  |            |
| 68.                 | trial.ab.                                    |            |
| 69.                 | groups.ab.                                   |            |
| 70.                 | or/64-69                                     | 2 757 989  |
| 71.                 | 5 and 63 and 70                              | 3036       |
| 72.                 | exp animals/ not humans.sh.                  |            |
| 73.                 | 71 not 72                                    |            |
| 74.                 | 73 not (comment or editorial).pt             | 2964       |
| 75.                 | Limit 74 to yr= "2017-Current"               | <b>538</b> |

**CENTRAL: Search on CVDs**

| Nr. | Searches (14th August 2017)                                                                                                | Results |
|-----|----------------------------------------------------------------------------------------------------------------------------|---------|
| 1   | Africa, explode all trees                                                                                                  |         |
| 2   | Algeria* or Angol* or Benin* or Botswan*                                                                                   |         |
| 3   | (Burkina Faso) or Burund* or Cameroon* or (Cape Verde) or (Central African Republic)                                       |         |
| 4   | Chad* or Comoros* or Cote d'Ivoire or Congo*                                                                               |         |
| 5   | Djibout* or Egypt* or (Equatorial Guinea*) or Eritrea*                                                                     |         |
| 6   | Ethiop* or Gabon* or Gambia* or Ghana* or Guinea* or Guinea-Bissau                                                         |         |
| 7   | Kenya* or Lesoth* or Liberia* or Libya* or Madagascar* or Malawi*                                                          |         |
| 8   | Mali* or Mauritania* or Mauritius* or Morocc* or Mozambique* or Namibia* or Niger*                                         |         |
| 9   | Nigeria* or Rwanda* or (Sao Tome and Principe) or Senegal* or Seychell*                                                    |         |
| 10  | Sierra Leone or Somalia* or (South Africa) or (South Sudan*) or Sudan* or Swasiland                                        |         |
| 11  | Tanzania* or Togo* or Tunisia* or Uganda* or Zambia* or Zimbabwe* or Somaliland or (Sahrawi Arab Democratic Republic)      |         |
| 12  | #1 or #2 or #3 or #4 or #5 or #6 or #7 or #8 or #9 or #10 or #11                                                           | 39 610  |
| 13  | MeSH descriptor Cardiovascular Diseases, this term only                                                                    |         |
| 14  | MeSH descriptor Heart Diseases explode all trees                                                                           |         |
| 15  | MeSH descriptor Vascular Diseases explode all trees                                                                        |         |
| 16  | MeSH descriptor Cerebrovascular Disorders, this term only                                                                  |         |
| 17  | MeSH descriptor Brain Ischemia explode all trees                                                                           |         |
| 18  | MeSH descriptor Carotid Artery Diseases explode all trees                                                                  |         |
| 19  | MeSH descriptor Dementia, Vascular explode all trees                                                                       |         |
| 20  | MeSH descriptor Intracranial Arterial Diseases explode all trees                                                           |         |
| 21  | MeSH descriptor Intracranial Embolism and Thrombosis explode all trees                                                     |         |
| 22  | MeSH descriptor Intracranial Hemorrhages explode all trees                                                                 |         |
| 23  | MeSH descriptor Stroke explode all trees                                                                                   |         |
| 24  | MeSH descriptor Hyperlipidemias explode all trees (4197)                                                                   |         |
| 25  | (coronar* or heart or peripheral* or cerebrovascular* or myocardial) near 3 (disease or infarct*)                          |         |
| 26  | myocardi* near 3 (infarct* or revascular* or ischaem* or ischem*)                                                          |         |
| 27  | vascular* near 3 (peripheral* or disease* or complication*)                                                                |         |
| 28  | hypertensi* or (high near 2 blood pressure)                                                                                |         |
| 29  | (heart near 2 failure) or stroke                                                                                           |         |
| 30  | Endocarditis or myocarditis or Cardiomegaly or arrythmi*                                                                   |         |
| 31  | #13 or #14 or #15 or #16 or #17 or #18 or #19 or #20 or #21 or #22 or #23 or #24 or #25 or #26 or #27 or #28 or #29 or #30 | 101 472 |
| 32  | #12 and #31                                                                                                                | 4139    |
| 32  | Trials                                                                                                                     | 2008    |

**CENTRAL, Update on hypertension**

| Nr. | Searches (23th June 2020)                                                            | Results |
|-----|--------------------------------------------------------------------------------------|---------|
| 1   | Africa, explode all trees                                                            |         |
| 2   | Algeria* or Angol* or Benin* or Botswan*                                             |         |
| 3   | (Burkina Faso) or Burund* or Cameroon* or (Cape Verde) or (Central African Republic) |         |
| 4   | Chad* or Comoros* or Cote d'Ivoire or Congo*                                         |         |
| 5   | Djibout* or Egypt* or (Equatorial Guinea*) or Eritrea*                               |         |
| 6   | Ethiop* or Gabon* or Gambia* or Ghana* or Guinea* or Guinea-Bissau                   |         |
| 7   | Kenya* or Lesoth* or Liberia* or Libya* or Madagascar* or Malawi*                    |         |
| 8   | Mali* or Mauritania* or Mauritius* or Morocc* or Mozambique* or Namibia* or Niger*   |         |
| 9   | Nigeria* or Rwanda* or (Sao Tome and Principe) or Senegal* or Seychell*              |         |

| Nr. | Searches (23th June 2020)                                                                                             | Results    |
|-----|-----------------------------------------------------------------------------------------------------------------------|------------|
| 10  | Sierra Leone or Somalia* or (South Africa) or (South Sudan*) or Sudan* or Swasiland                                   |            |
| 11  | Tanzania* or Togo* or Tunisia* or Uganda* or Zambia* or Zimbabwe* or Somaliland or (Sahrawi Arab Democratic Republic) |            |
| 12  | #1 or #2 or #3 or #4 or #5 or #6 or #7 or #8 or #9 or #10 or #11                                                      | 60 623     |
| 13  | MeSH descriptor: [Hypertension] explode all trees                                                                     |            |
| 14  | hypertensi* or (high near 2 blood pressure)                                                                           |            |
| 15  | #13 or #14                                                                                                            | 67 954     |
| 16  | #12 and #15                                                                                                           | 2929       |
|     | Trials, 2017-Current                                                                                                  | <b>333</b> |

### CINAHL, Search on 23.06.2020

(Africa\$ or Africa\$ or Algeria\$ or Angol\$ or Benin\$ or Botswan\$ or (Burkina Faso) or Burund\$ or Cameroon\$ or (Cape Verde) or (Central African Republic) or Chad\$ or Comoros\$ or Cote d'Ivoire or Congo\$ Djibout\$ or Egypt\$ or (Equatorial Guinea\$) or Eritrea\$ or Ethiop\$ or Gabon\$ or Gambia\$ or Ghana\$ or Guinea\$ or Guinea-Bissau or Kenya\$ or Lesoth\$ or Liberia\$ or Libya\$ or Madagascar\$ or Malawi\$ or Mali\$ or Mauritania\$ or Mauritius\$ or Morocc\$ or Mozambique\$ or Namibia\$ or Niger\$ or Nigeria\$ or Rwanda\$ or (Sao Tome and Principe) or Senegal\$ or Seychell\$ or Sierra Leone or Somalia\$ or (South Africa) or (South Sudan\$) or Sudan\$ or Swasiland or Tanzania\$ or Togo\$ or Tunisia\$ or Uganda\$ or Zambia\$ or Zimbabwe\$ or Somaliland or (Sahrawi Arab Democratic Republic)) in Abstract

AND

hypertension or high blood pressure or elevated blood pressure or htn or hypertensive in Abstract

AND

randomized or rct or randomised in Abstract

AND

In English

AND

Peer-reviewed

And

Humans

**Total: 42 results**

### International Clinical Trials Registry Platform (<http://apps.who.int/trialsearch/AdvSearch.aspx>), Search on 22 October 2019

**hypertension or (blood pressure control) or (high blood pressure) in the condition,**

**Recruitment status: all**

**Countries of recruitment:**

- Africa or African in the title: 90 trials
- Algeria or Angola or Behin or Burkina Faso or Botswana or Burundi or Cameroon or Central Africa Republic or Chad or Congo or Cabo Verde or Cite D'Ivoire: 13 trials
- Democratic Republic of Congo or Djibouti or Egypt or Equatorial Guinea or Eritrea or Ethiopia or Gabon or Gambia or Ghana or Guinea or Guinea-Bissau or Kenya: 78 trials
- Lesotho or Liberia or Libya or Madagascar or Malawi or Mali or Mauritius or Morocco or Mozambique: 14 trials
- Namibia or Niger or Nigeria or Rwanda or Sao Tome and Principe or Senegal or Seychelles or Sierra Leone or Somalia or Sudan or South Sudan or Swaziland: 23 trials
- Togo or Tunezia or United Republic of Tanzania or Uganda or Zambia or Zimbabwe: 25 trials

**Total: 18 results**

**Table 1 : Inclusion and exclusion criteria**

|                                                                                                                                                                                 |                                                                                                                                                                                     |
|---------------------------------------------------------------------------------------------------------------------------------------------------------------------------------|-------------------------------------------------------------------------------------------------------------------------------------------------------------------------------------|
| Design                                                                                                                                                                          | RCTs conducted in African countries, in international studies with at least 50 % African countries                                                                                  |
| Population                                                                                                                                                                      | African adult patients in secondary and tertiary prevention, diagnosis and treatment of hypertension<br>Exclusion of patients with gestational diabetes, Pre-eclampsia or eclampsia |
| Intervention                                                                                                                                                                    | All non-pharmacological strategies to improve adequate diagnoses, prevention and treatment of hypertension                                                                          |
| Control                                                                                                                                                                         | <ul style="list-style-type: none"> <li>- No intervention</li> <li>- Standard care</li> <li>- Another intervention</li> </ul>                                                        |
| Outcome                                                                                                                                                                         | blood pressure (SBP, DBP, MAP), adherence to recommendations (medications and lifestyle changes) and costs within longest follow-up                                                 |
| Publication                                                                                                                                                                     | Full-text publications according to CONSORT in English or German                                                                                                                    |
| CONSORT: Consolidated Standards of Reporting Trials; DBP: Diastolic blood pressure; MAP: Mean arterial pressure; SBP: Systolic blood pressure, RCT: Randomized controlled trial |                                                                                                                                                                                     |

Table 1: Study characteristics

|                                                      |                      | Participants |                          |                                             | Intervention (IG) vs. Control (CG)                                                                                                                                                                                                        |                       | Results on adherence and blood pressure                                                                                                                                                                                                                                                                                                                                                                                                   |
|------------------------------------------------------|----------------------|--------------|--------------------------|---------------------------------------------|-------------------------------------------------------------------------------------------------------------------------------------------------------------------------------------------------------------------------------------------|-----------------------|-------------------------------------------------------------------------------------------------------------------------------------------------------------------------------------------------------------------------------------------------------------------------------------------------------------------------------------------------------------------------------------------------------------------------------------------|
| Name (design)                                        | Country              | n            | Age (years) /<br>Females | hypertension;<br>SBP /DBP<br>(mmHg)         | Description                                                                                                                                                                                                                               | Follow-up<br>(months) | IG vs. CG; treatment effect (95 %-CI)                                                                                                                                                                                                                                                                                                                                                                                                     |
| <b>Educational strategies for patients (11 RCTs)</b> |                      |              |                          |                                             |                                                                                                                                                                                                                                           |                       |                                                                                                                                                                                                                                                                                                                                                                                                                                           |
| Adeyemo 2013 RCT                                     | Nigeria (mixed)      | 668          | 62.7±10.0 / 66 %         | mild to moderate<br>167.4±19.2 / 91.8 ±12.3 | home visits by nurses and clinic management (community based, nurse-led treatment program with physician backup; facilitation of clinic visits and health education; use of diuretics and a beta blocker as needed) vs. clinic management | 6                     | <u>excellent adherence</u> (missed ≤2 pills per month): worse in IG: 72.5% vs. 79.0%; OR <sub>s</sub> 0.524 (0.30; 0.75)<br><u>BP control</u> : no difference 65.0 vs. 66.3%; RR 0.98 (0.87;1.11)                                                                                                                                                                                                                                         |
| Ayodapo 2019 RCT                                     | Nigeria (mixed)      | 322          | 60.9±10.0 / 51 %         | MAP:<br>106.4±8.3                           | Counselling on lifestyle behaviors (physical activity, fruit and vegetable consumption, alcohol consumption, smoking) over 30-45 minutes, reminders (telephone calls/SMS) vs. usual care                                                  | 3                     | <u>Met recommendations on:</u><br>Physical activity: better in IG: 22.4 vs. 6.2 %; RR 3.60 (1.85;7.00)<br>fruit and vegetable consumption: better in IG: 71.4 vs. 66 %; RR 1.74 (1.41;2.15)<br>alcohol consumption: better in IG: 100 vs. 87.6 %; RR 1.14 (1.08; 1.21)<br>smoking: no difference: 83.9 vs. 78.5 %; RR 1.05 (0.95; 1.17)<br><u>blood pressure:</u><br>MAP: lower in IG: 94.6±8.1 vs. 106.2±7.6 mmHg; MD -9.8 (-11.5; -8.1) |
| Bobrow 2016 (PACTR2014 11000724141) RCT              | South Africa (urban) | 1372         | 54.3±11.5 / 72 %         | mild to moderate<br>135.4±17.5<br>83.4±12.1 | mobile phone text messages on behavior change techniques (IG2: interactive with information and possibility to response vs. IG1: only information on hypertension, motivation to take medications and reminders) vs. usual care           | 12                    | <u>adherence</u> (days with medication ≥ 80 %): higher with IG: 59.7 vs. 62.8 vs. 49.4 %; RR 1.12 (1.01;1.23)<br>IG2 vs. CG: OR <sub>s</sub> 1.86 (1.39;2.49)<br>IG1 vs. CG: OR <sub>s</sub> 1.60 (1.20;2.16)<br><u>blood pressure:</u> slightly lower with IG1                                                                                                                                                                           |



1  
2  
3  
4  
5  
6  
7  
8  
9  
10  
11  
12  
13  
14  
15  
16  
17  
18  
19  
20  
21  
22  
23  
24  
25  
26  
27  
28  
29  
30  
31  
32  
33  
34  
35  
36  
37  
38  
39  
40  
41  
42  
43  
44  
45  
46

|                                            |                  | Participants |                       |                                | Intervention (IG) vs. Control (CG)                                                                                                                                             |                    | Results on adherence and blood pressure                                                                                                                                                                                                                                                                                                                                                                                                         |
|--------------------------------------------|------------------|--------------|-----------------------|--------------------------------|--------------------------------------------------------------------------------------------------------------------------------------------------------------------------------|--------------------|-------------------------------------------------------------------------------------------------------------------------------------------------------------------------------------------------------------------------------------------------------------------------------------------------------------------------------------------------------------------------------------------------------------------------------------------------|
| Name (design)                              | Country          | n            | Age (years) / Females | hypertension; SBP /DBP (mmHg)  | Description                                                                                                                                                                    | Follow-up (months) |                                                                                                                                                                                                                                                                                                                                                                                                                                                 |
|                                            |                  |              |                       |                                |                                                                                                                                                                                |                    | IG vs. CG; treatment effect (95 %-CI)                                                                                                                                                                                                                                                                                                                                                                                                           |
|                                            |                  |              |                       |                                |                                                                                                                                                                                |                    | SBP: 132.7±17.5 vs. 132.1±16.6 vs. 134.3±17.3 mmHg<br>IG2 vs. CG: MD <sub>a</sub> -1.6 mmHg (-3.7; 0.6)<br>IG1 vs. CG: MD <sub>a</sub> -2.2mmHg (-4.4; -0.04)<br>BP control: slightly better with IG: 65 vs. 65 vs. 58 %<br>IG1 vs. CG: OR <sub>a</sub> 1.42 (1.03; 1.95)<br>IG2 vs. CG: OR <sub>a</sub> 1.41 (1.02; 1.95)                                                                                                                      |
| Bolarinwa 2019 (PACTR2016 06001671335) RCT | Nigeria (urban)  | 299          | 61.1±10.8 / 77 %      | 140.0 ± 22.9 / 86.9 ±11.9      | task-shifting (driven by trained and professionally competent nurses) home-based follow-up care (BP and BMI monitoring, medical advice and counselling at home) vs. usual care | 12                 | medical adherence: better with IG: low: 4 vs. 16.6%, medium: 17.5 vs. 34.7%, high: 78.5% vs. 48.7%<br>BP control: better with IG: 85.9% vs. 76.7%; RR 1.12 (1.00; 1.25)                                                                                                                                                                                                                                                                         |
|                                            |                  |              |                       |                                |                                                                                                                                                                                |                    |                                                                                                                                                                                                                                                                                                                                                                                                                                                 |
| Labhardt 2011 cluster RCT                  | Cameroon (rural) | 187          | 59.9± 12.5/ 64 %      | mild to moderate 175.8 / 100.7 | reminder letters in case of missing follow-up (IG2) vs. financial incentive (one month free treatment for regular attenders) (IG1) vs. usual care in nurse-led facilities      | 12                 | adherence: retention rate: 60 vs. 65 vs. 29%; lower risk of loss to follow up from the program and better adherence in IG<br>IG2 vs. CG: HR <sub>a</sub> : 0.38 (0.24; 0.61)<br>IG1 vs. CG: HR <sub>a</sub> : 0.44 (0.27; 0.72)<br>adherence (≥ 80 %): 38 vs. 35 vs. 10 %<br>IG2 vs. CG: MD <sub>a</sub> : 28 % (14; 42)<br>IG1 vs. CG: MD <sub>a</sub> : 25 % (13; 37)<br>blood pressure: no differences in SBP in retained patients<br>Costs: |

Commented [U1]: Müssen wir laut Einschlusskriterien ausschließen, da keine Ergebnisse zu Bluthochdruck

|                                      |                      | Participants |                           |                                                                                                                                                       | Intervention (IG) vs. Control (CG)                                                                                                                                                                                                                                                                                                                                                                                                          |                    | Results on adherence and blood pressure                                                                                                                                                                                                                                    |
|--------------------------------------|----------------------|--------------|---------------------------|-------------------------------------------------------------------------------------------------------------------------------------------------------|---------------------------------------------------------------------------------------------------------------------------------------------------------------------------------------------------------------------------------------------------------------------------------------------------------------------------------------------------------------------------------------------------------------------------------------------|--------------------|----------------------------------------------------------------------------------------------------------------------------------------------------------------------------------------------------------------------------------------------------------------------------|
| Name (design)                        | Country              | n            | Age (years) / Females     | hypertension; SBP /DBP (mmHg)                                                                                                                         | Description                                                                                                                                                                                                                                                                                                                                                                                                                                 | Follow-up (months) | IG vs. CG; treatment effect (95 %-CI)                                                                                                                                                                                                                                      |
|                                      |                      |              |                           |                                                                                                                                                       |                                                                                                                                                                                                                                                                                                                                                                                                                                             |                    | In IG1: average monthly cost per patient for antihypertensive medication: 1.1±0.9 €, transport: 1.1±1.0 €                                                                                                                                                                  |
| Owolabi 2019 (NCT01900756) RCT       | Nigeria (mixed)      | 400#         | 57.2 ± 11.7 / 37 %        | All stroke (n=400); 138.3 ± 23.6<br>83.0 ± 15.2<br>stroke and uncontrolled hypertension (SBP/DBP>140 /90 mmHg) (n=168)<br>158.7 ± 21.7<br>92.5 ± 15.6 | chronic care model components of delivery system redesign (increased follow-up visits, pre-appointment phone texts), self-management support (patient report card, post-clinic follow-up phone texts, waiting room educational video) and clinical information systems (patient report card as part of medical chart, hospital registry) vs. standardized usual care (risk factor identification and control) and phone contact information | 12                 | <u>Blood pressure:</u><br>No difference for all patients after stroke:<br>SBP: 136.5±22.3 vs. 136.2±21.2 mmHg<br>patients with uncontrolled hypertension:<br>SBP: 145.1±22.6 vs. 148.5±22.8 mmHg                                                                           |
| Sarfo 2019 (NCT02568137) cluster-RCT | Ghana (urban)        | 60#          | 55 ± 13 / 35 %            | stroke and uncontrolled hypertension; 143.8 ± 26.7<br>90.5 ± 15.7                                                                                     | Nurse-led, multilevel approach with m-Health technology for monitoring and reporting BP measurement and tailored motivational text messages vs. usual care                                                                                                                                                                                                                                                                                  | 9                  | <u>adherence:</u><br>modified MMA score: no difference: 13±1.5 vs. 13±1.7<br><u>Blood pressure:</u><br>BP control: no difference: 47 vs. 40 %;<br>OR <sub>a</sub> : 1.24 (0.83; 1.84)<br>SBP<140 mmHg: better in IG: 73 vs. 43 %<br>DBP<90 mmHg: better in CG: 47 vs. 77 % |
| Saunders 1991 RCT                    | South Africa (urban) | 224          | 65 % between 40-50 / 73 % | mild to moderate; n.r.<br>116.6                                                                                                                       | Reminder letters and home visits by fieldworkers and patient-retained records for self-monitoring of medication compliance and BP control vs. usual care (appointment system and health education)                                                                                                                                                                                                                                          | 6                  | <u>adherence</u> (treatment received) over 6 months:<br>higher for newly treated (135.5±48.9 vs. 95.0±60.0 days) and infrequent                                                                                                                                            |

1  
2  
3  
4  
5  
6  
7  
8  
9  
10  
11  
12  
13  
14  
15  
16  
17  
18  
19  
20  
21  
22  
23  
24  
25  
26  
27  
28  
29  
30  
31  
32  
33  
34  
35  
36  
37  
38  
39  
40  
41  
42  
43  
44  
45  
46

|                                          |                      | Participants |                        |                                         | Intervention (IG) vs. Control (CG)                                                                                                                                                                    |                    | Results on adherence and blood pressure                                                                                                                                                                                                                                                                                                                                                                   |
|------------------------------------------|----------------------|--------------|------------------------|-----------------------------------------|-------------------------------------------------------------------------------------------------------------------------------------------------------------------------------------------------------|--------------------|-----------------------------------------------------------------------------------------------------------------------------------------------------------------------------------------------------------------------------------------------------------------------------------------------------------------------------------------------------------------------------------------------------------|
| Name (design)                            | Country              | n            | Age (years) / Females  | hypertension; SBP /DBP (mmHg)           | Description                                                                                                                                                                                           | Follow-up (months) | IG vs. CG; treatment effect (95 %-CI)                                                                                                                                                                                                                                                                                                                                                                     |
|                                          |                      |              |                        |                                         |                                                                                                                                                                                                       |                    | <p>attenders (168.4±16.4 vs.116.7±56.9 days) of 180 days &gt;80 % of treatment; better for newly treated (59 vs. 29 %; p&lt; 0.001) and infrequent attenders (87 vs. 42 %; p&lt; 0.001)</p> <p><u>blood pressure:</u><br/>DBP: lower for newly treated patients (93.4 vs. 100.5 mmHg; MD: 7.1 mmHg (0.5-13.7), no difference for infrequent attenders: 97.5 vs. 94.7 mmHg; MD: - 2.8 mmHg (-6.9; 1.3)</p> |
| Stewart 2005 RCT                         | South Africa (urban) | 83           | late middle aged/ n.r. | all hypertensives; 146.4±18.5 93.5±11.1 | telephonic intervention (educational and home-based exercise program + support of a healthcare practitioner and a family member) vs. control group (educational and home-based exercise program only) | 6                  | <p><u>adherence:</u> better with IG: 62.8 ±34.5% vs. 39.3± 42.8 %; p=0.007</p> <p><u>blood pressure:</u> no difference: SBP: 142±16 vs. 144±20 mmHg; MD: - 2 mmHg (-10.3 - 6.3)<br/>DBP: 92±12 vs. 91±10 mmHg, change: MD: 1 mmHg (-4.0 - 6.0)</p>                                                                                                                                                        |
| Vedanthan 2019 (NCT01844596) cluster-RCT | Kenya (rural)        | 1460         | 54.2±16.4/ 58 %        | all hypertensives; 159.4±19.5 89.7 ±12  | tailored behavioral communication (smartphone (IG2) or paper-based (IG1)) vs. usual care                                                                                                              | 12                 | <p><u>adherence</u> (Linkage to care): best results with IG2, worse with IG1:<br/>IG2 vs. CG: OR<sub>3</sub>: 1.21 (0.70; 2.01)<br/>IG1 vs. CG: OR<sub>3</sub>: 0.64 (0.43; 0.91)<br/>IG2 vs. IG1: OR<sub>3</sub>: 1.95 (1.23; 3.01)</p> <p><u>blood pressure:</u> no difference<br/>SBP: 149.4±20.8 vs. 150.2±21.6 vs. 150.0±22.9 mmHg, change: -13.1±20.5 vs. -8.4±24.0 vs. - 9.7±25.1 mmHg</p>         |

|                                                                      |                      | Participants |                       |                                                             | Intervention (IG) vs. Control (CG)                                                                                                                                                                                               |                    | Results on adherence and blood pressure                                                                                                                                                                                                                                                                                                                                                                                                                                              |
|----------------------------------------------------------------------|----------------------|--------------|-----------------------|-------------------------------------------------------------|----------------------------------------------------------------------------------------------------------------------------------------------------------------------------------------------------------------------------------|--------------------|--------------------------------------------------------------------------------------------------------------------------------------------------------------------------------------------------------------------------------------------------------------------------------------------------------------------------------------------------------------------------------------------------------------------------------------------------------------------------------------|
| Name (design)                                                        | Country              | n            | Age (years) / Females | hypertension; SBP /DBP (mmHg)                               | Description                                                                                                                                                                                                                      | Follow-up (months) | IG vs. CG; treatment effect (95 %-CI)                                                                                                                                                                                                                                                                                                                                                                                                                                                |
|                                                                      |                      |              |                       |                                                             |                                                                                                                                                                                                                                  |                    | IG2 vs. CG: MD <sub>a</sub> : -2.13 mmHg (-4.89;0.42)<br>IG1 vs. CG: MD <sub>a</sub> : -0.06 mmHg (-3.61; 3.20)<br>IG2 vs. IG1: MD <sub>a</sub> : -2.07 mmHg (-5.14;1.12)<br>DBP: no difference: 91.3±12.7 vs. 91.0±14.1 vs. 90.1±13.7 mmHg, change: 1.5±12.7 vs. 0.4±15.2 vs. 0.1±14.7 mmHg<br>BP control: no difference:<br>IG2 vs. CG: OR <sub>a</sub> : 0.95 (0.61; 1.38)<br>IG1 vs. CG: OR <sub>a</sub> : 0.97 (0.63; 1.42)<br>IG2 vs. IG1: OR <sub>a</sub> : 1.00 (0.69; 1.40) |
| Wahab 2017 RCT                                                       | Nigeria (urban)      | 35#          | 58.1 ±10.5/ 34 %      | all patients with stroke; 138.3 ± 24.2 85.0 ±12.4           | feasibility of a nurse-led Intervention (education and skill building, BP monitor with review, phone calls) vs. usual care                                                                                                       | 0.5                | <u>adherence</u> : no difference, but improvement in both groups: MMA Score: 7.32±0.93 vs. 7.03±1.36<br><u>Blood pressure</u> : no difference<br>SBP: 137.5±23.0 vs.133.1±18.2 mmHG; MD: 4.40 mmHg (-9.4; 18.2)<br>DBP: 84.1±9.7 vs. 84.2±13.1 mmHg; MD -0.1 mmHg (-7.7; 7.5)                                                                                                                                                                                                        |
| <b>Educational strategies for health-care professionals (5 RCTs)</b> |                      |              |                       |                                                             |                                                                                                                                                                                                                                  |                    |                                                                                                                                                                                                                                                                                                                                                                                                                                                                                      |
| Fairall 2016 (ISRCTN20283604) cluster-RCT                            | South Africa (rural) | 4393         | 52 (IQR 43-62)/ 73 %  | mild to moderate 139±23.6 <sup>a</sup> 90±13.2 <sup>a</sup> | Education of nurses on NCD care (nurse training in educational outreach sessions with a primary care program to expand their role in NCD care, authorization to prescribe an expanded range of drugs on NCDs) vs. usual training | 14                 | <u>adherence</u> : no difference<br><u>Blood pressure</u> :<br>BP controlled: no difference: 33 vs. 32 %; RR 1.01 (0.2-1.8)                                                                                                                                                                                                                                                                                                                                                          |

1  
2  
3  
4  
5  
6  
7  
8  
9  
10  
11  
12  
13  
14  
15  
16  
17  
18  
19  
20  
21  
22  
23  
24  
25  
26  
27  
28  
29  
30  
31  
32  
33  
34  
35  
36  
37  
38  
39  
40  
41  
42  
43  
44  
45  
46

|                                          |                      | Participants |                       |                                                                                                                                    | Intervention (IG) vs. Control (CG)                                                                                                                                                                                                                                                         |                    | Results on adherence and blood pressure                                                                                                                                                                                                                                                                                                                 |
|------------------------------------------|----------------------|--------------|-----------------------|------------------------------------------------------------------------------------------------------------------------------------|--------------------------------------------------------------------------------------------------------------------------------------------------------------------------------------------------------------------------------------------------------------------------------------------|--------------------|---------------------------------------------------------------------------------------------------------------------------------------------------------------------------------------------------------------------------------------------------------------------------------------------------------------------------------------------------------|
| Name (design)                            | Country              | n            | Age (years) / Females | hypertension; SBP /DBP (mmHg)                                                                                                      | Description                                                                                                                                                                                                                                                                                | Follow-up (months) | IG vs. CG; treatment effect (95 %-CI)                                                                                                                                                                                                                                                                                                                   |
| Goudge 2018 (ISRCTN12128227) cluster-RCT | South Africa (rural) | 4722         | 56.6±19.4 / 56 %      | hypertension: 46.6 %, of them: 53.4%, on treatment and controlled: 8.6%, on treatment and uncontrolled: 9 %, not on treatment 29 % | Support of nurses by health workers (e.g. assistance with booking appointments, retrieve and fill patient files, health education, measurements in the vital signs queue, prepacking of medications, reminders to appointment for patients) to provide chronic disease care vs. usual care | 18                 | No hypertension: 50.9% vs. 52.9%<br><u>adherence and blood pressure: no difference</u><br>on treatment and controlled: 11.3 vs. 11.2 %<br>on treatment and uncontrolled 13.0 vs. 13.2 %<br>not on treatment 24.9% vs. 22.7%<br>undiagnosed: 24.1 vs. 22.2 %<br>taking medication: 24.3 vs. 24.4 %                                                       |
| Gyamfi 2017 (NCT01802372) cluster-RCT    | Ghana (mixed)        | 757          | 58.0±12.4 / 60 %      | mild to moderate 155.9 ± 12.1 / 89.6 ± 10.8                                                                                        | Training of nurses in task shifting for hypertension control + health insurance coverage vs. health coverage                                                                                                                                                                               | 12                 | <u>blood pressure</u> : improvement in both groups, but no difference between groups:<br>SBP: 137.1±27.5 vs. 138.4±27.3 mmHg; change: -19.5±18.0 vs. -16.6±17.9 mmHg; MD: -2.9 mmHg (-6.9; 1.0)<br>DBP: 79.8±22.9 vs.81.8±22.8 mmHg; change -9,3±11.5 vs. 8.7±18.7 mmHg; MD -0.6 mmHg (-2.9; 1.7)<br>BP control: 55.2 vs. 49.9 % (MD 5.2 % (-1.8; 12.4) |
| Mendis 2010 cluster-RCT                  | Nigeria (mixed)      | 1188         | 55 ± 4.7 / 58 %       | mild to moderate 153.2±12.4 94 ± 9.7                                                                                               | Education of health-care workers and patients with a simple cardiovascular risk management package vs. usual care                                                                                                                                                                          | 12                 | <u>adherence</u> : higher with IG<br>Attended visits: 90.1 vs. 74.5 %<br>quit smoking: 100 vs. 74.4 % (p=0.023)<br>Increased fruit consumption: 93.4 vs. 18.8 % (p< 0.0001)                                                                                                                                                                             |

|                                                                              |                                      | Participants |                       |                                                | Intervention (IG) vs. Control (CG)                                                                                                                                                               |                    | Results on adherence and blood pressure                                                                                                                                                                                                      |
|------------------------------------------------------------------------------|--------------------------------------|--------------|-----------------------|------------------------------------------------|--------------------------------------------------------------------------------------------------------------------------------------------------------------------------------------------------|--------------------|----------------------------------------------------------------------------------------------------------------------------------------------------------------------------------------------------------------------------------------------|
| Name (design)                                                                | Country                              | n            | Age (years) / Females | hypertension; SBP /DBP (mmHg)                  | Description                                                                                                                                                                                      | Follow-up (months) | IG vs. CG; treatment effect (95 %-CI)                                                                                                                                                                                                        |
|                                                                              |                                      |              |                       |                                                |                                                                                                                                                                                                  |                    | increased vegetable consumption: 14.2 vs. 7.0 % (p=0.0002)<br><u>blood pressure</u> : higher decrease in IG<br>SBP: -11.0±15.4 vs. -6.6±20.6 mmHg; MD -4.4 mmHg (-6.7; -2.1)<br>DBP: -5.4±10.0 vs. -2.0±13.2 mmHg; MD -3.4 mmHg (-4.9; -1.9) |
| Steyn 2013 (PACTR2013 03000493351) cluster-RCT                               | South Africa (urban)                 | 920          | 60.3±11.1 / 79 %      | all hypertensives1<br>51.2 ±26.7 / 87.1 ± 12.4 | multi-faced intervention to implement national guidelines (structured record of national guidelines and visits to train clinicians) vs. usual care (passive dissemination) at primary care level | 12                 | <u>Blood pressure</u> : no difference<br>SBP: 161±28.9 vs. 158.2±29.5 mmHg; MD 2.8 mmHg (-1.2; 6.8)<br>DBP: 88.1±13 vs. 87.1±12.6 mmHg; MD 1.00 mmHg (-0.73; 2.73)<br>controlled BP: 23.1 vs. 26 %                                           |
| <b>Individualized treatment (3 RCTs)</b>                                     |                                      |              |                       |                                                |                                                                                                                                                                                                  |                    |                                                                                                                                                                                                                                              |
| Akintunde 2017 (ISRCTN69440037) RCT {Akintunde, 2017 #4980} (ISRCTN69440037) | Nigeria, Kenya, South Africa (urban) | 105          | 56.6±14.3 / 53 %      | uncontrolled<br>170.9 ± 19.2 / 85.6 ± 21.8     | physiologically individualized care (guided by their physiological phenotype, based on plasma renin and aldosterone) vs. usual care                                                              | 12                 | <u>blood pressure</u> : lower in IG<br>SBP: 139.4±17.4 vs. 152.6±12.3 mmHg; MD -13.2 mmHg (-19.4; -7.0)<br>DBP: 84.0±11.0 vs. 89.6±7.0 mmHg; MD -5.6 mmHg (-9.4; -1.8)<br>BP control: 50.0 vs. 11.1 % (p=0.0001)                             |
| Okeahialam 2011 RCT                                                          | Nigeria (urban)                      | 181          | 49.7±14.2 / 61 %      | mild to moderate<br>150.3 ± 14.8 / 93.7 ± 9.6  | chronotherapy: drug intake in the night (10 pm) vs. drug intake in the morning (10 am)                                                                                                           | 3                  | <u>blood pressure</u> : higher decrease in IG<br>SBP: . -18.1±17.9 vs.-14.1±14.7 mmHg; MD -4.0 mmHg (-9.0;1.0)<br>DBP-15.6±12.2 vs.-8.7±10.2 mmHg; MD -6.9 mmHg (-10.4; -3.4)                                                                |
| <b>Physical activity (4 RCTs)</b>                                            |                                      |              |                       |                                                |                                                                                                                                                                                                  |                    |                                                                                                                                                                                                                                              |

|                                   |                      | Participants |                               |                                                  | Intervention (IG) vs. Control (CG)                                                                                                                 |                    | Results on adherence and blood pressure                                                                                                                                                |
|-----------------------------------|----------------------|--------------|-------------------------------|--------------------------------------------------|----------------------------------------------------------------------------------------------------------------------------------------------------|--------------------|----------------------------------------------------------------------------------------------------------------------------------------------------------------------------------------|
| Name (design)                     | Country              | n            | Age (years) / Females         | hypertension; SBP /DBP (mmHg)                    | Description                                                                                                                                        | Follow-up (months) | IG vs. CG; treatment effect (95 %-CI)                                                                                                                                                  |
| Aweto 2012 RCT                    | Nigeria (urban)      | 50           | 45±12.3 / 58 %                | mild to moderate 138.7±10.9 / 79.9±9.3           | dance movement therapy (50 minutes) vs. educational sessions, both 2x/week over 4 wks                                                              | 1                  | <u>blood pressure</u> : lower in IG SBP: 119.9±8.3 vs. 135.5±11.6 mmHg; MD -15.6 mmHg (-22.4; -8.8) DBP: 70.9±7.2 vs. 74.1±7.7 mmHg; MD -3.2 mmHg (-8.1; 1.7)                          |
| Lamina 2010 RCT                   | Nigeria (urban)      | 485          | 58.5 ±6.8 / 0 %               | mild to moderate, stable 165.4±13.2 / 98.1 ± 4.6 | training programs on bicycle ergometer, 3x/wk, 45-60 minutes: Interval training (IG2) vs. continuous training (IG1) vs. usual care over 8 wks      | 2                  | <u>blood pressure</u> : lower in IG SBP: 150.4±16.7 vs. 154.4±12.6 vs.163.5±14.9 mmHg; MD -11.1 mmHg (-14.8; -7.4) DBP: 95±5 vs. 94.4±8.8 vs. 96.1±2.7 mmHg; MD -1.4 mmHg (-2.6; -0.2) |
| Maruf 2016 (ISRCTN81952488) RCT   | Nigeria (urban)      | 120          | 52.8±8.4 (range 38-65) / 71 % | mild to moderate, 155.7±11.4 / 93±10             | aerobic dance training (3x/wk, 45 minutes) vs. usual care over 12 wks                                                                              | 3                  | <u>blood pressure</u> : lower in IG SBP: 135.3±5.6 vs. 142.4±4.7 mmHg; MD: -7.1 mmHg (-9.3; -4.9) DBP: 82.2±3.4 vs. 83.9±2.8 mmHg; MD: -1.7 mmHg (-3.0; -0.4)                          |
| Turky 2013 RCT                    | Egypt (urban)        | 30           | 52.8±2.4, 40-50 / 100 %       | postmeno-pausal hypertensives 151±6.2 / 94.5±4.2 | moderate aerobic exercise training (40 minutes, 3x/wk) by walking on a treadmill vs. usual care over 8 wks                                         | 2                  | <u>blood pressure</u> : lower in IG SBP: 124±5.6 vs. 145±6.7 mmHg; MD: -21.0 mmHg (-25.8; -16.2) DBP: 85±5.4 vs. 95±3.7 mmHg; MD: -10.0 mmHg (-13.7; -6.3)                             |
| <b>Modified nutrition (1 RCT)</b> |                      |              |                               |                                                  |                                                                                                                                                    |                    |                                                                                                                                                                                        |
| Charlton 2008 RCT                 | South Africa (urban) | 92           | 61.1±7/ 84 %                  | mild to moderate 134.6±15.7 / 81.1±8.1           | food-based dietary strategy (modified food, salt replacement, + 500 ml of maas (fermented milk) vs. control (same quantities of the targeted foods | 2                  | <u>blood pressure</u> : lower in IG SBP: 132.5±15.8 vs. 127.5±15.8 mmHg; MD <sub>s</sub> :-6.2 mmHg (-11.4; -0.9)                                                                      |

1  
2  
3  
4  
5  
6  
7  
8  
9  
10  
11  
12  
13  
14  
15  
16  
17  
18  
19  
20  
21  
22  
23  
24  
25  
26  
27  
28  
29  
30  
31  
32  
33  
34  
35  
36  
37  
38  
39  
40  
41  
42  
43  
44  
45  
46

|                                                                                                                                                                                                                                                                                                                                                                                                                                                                               |         | Participants |                       |                               | Intervention (IG) vs. Control (CG)                                             |                    | Results on adherence and blood pressure                                   |
|-------------------------------------------------------------------------------------------------------------------------------------------------------------------------------------------------------------------------------------------------------------------------------------------------------------------------------------------------------------------------------------------------------------------------------------------------------------------------------|---------|--------------|-----------------------|-------------------------------|--------------------------------------------------------------------------------|--------------------|---------------------------------------------------------------------------|
| Name (design)                                                                                                                                                                                                                                                                                                                                                                                                                                                                 | Country | n            | Age (years) / Females | hypertension; SBP /DBP (mmHg) | Description                                                                    | Follow-up (months) | IG vs. CG; treatment effect (95 %-CI)                                     |
|                                                                                                                                                                                                                                                                                                                                                                                                                                                                               |         |              |                       |                               | of standard commercial composition, 500 ml/d artificially sweetened cooldrink) |                    | DBP: 82.2±9.5 vs. 79.2±11.4 mmHg; MD <sub>a</sub> : -0.6 mmHg (-3.0; 1.8) |
| # tertiary prevention<br>BMI: body mass index; BP: blood pressure; CG: Control group; DBP: diastolic blood pressure; IG: Intervention group; MD: mean difference; MD <sub>a</sub> : adjusted mean difference; n: number of randomized participants; MMA: Morisky medication adherence; NCD: non-communicable disease; n.r. not reported; ; OR <sub>a</sub> : adjusted odds ratio; RCT: randomized controlled trial; RR: relative risk; SBP: systolic blood pressure; wk: week |         |              |                       |                               |                                                                                |                    |                                                                           |

Peer review only



Table 2: Risk of bias assessment

| Study                         | Sequence generation | Allocation concealment | Blinding of              |                   | Incomplete outcome data | Selective reporting | Other sources |
|-------------------------------|---------------------|------------------------|--------------------------|-------------------|-------------------------|---------------------|---------------|
|                               |                     |                        | personnel / participants | outcome assessors |                         |                     |               |
| <b>Educational strategies</b> |                     |                        |                          |                   |                         |                     |               |
| Adeyemo 2013                  | 😊                   | 😊                      | 😞                        | 😊                 | 😞                       | 😊                   | 😞             |
| Ayodapo 2019                  | 😊                   | 😊                      | 😞                        | 😞                 | 😊                       | 😊                   | 😊             |
| Bobrow 2016                   | 😊                   | 😊                      | 😞                        | 😊                 | 😞                       | 😊                   | 😊             |
| Bolarinwa 2019                | 😊                   | 😊                      | 😞                        | 😞                 | 😞                       | 😞                   | 😞             |
| Fairall 2016                  | 😊                   | 😊                      | 😞                        | 😊                 | 😊                       | 😊                   | 😊             |
| Goudge 2018                   | 😊                   | 😊                      | 😞                        | 😊                 | 😞                       | 😊                   | 😊             |
| Gyamfi 2017                   | 😊                   | 😊                      | 😞                        | 😊                 | 😞                       | 😞                   | 😊             |
| Labhardt 2011                 | 😊                   | 😊                      | 😞                        | 😞                 | 😞                       | 😞                   | 😊             |
| Mendis 2010                   | 😞                   | 😞                      | 😞                        | 😞                 | 😞                       | 😊                   | 😊             |
| Owolabi 2019                  | 😊                   | 😊                      | 😞                        | 😊                 | 😊                       | 😞                   | 😊             |
| Sarfo 2019                    | 😊                   | 😊                      | 😞                        | 😊                 | 😊                       | 😊                   | 😊             |
| Saunders 1991                 | 😊                   | 😊                      | 😞                        | 😞                 | 😊                       | 😊                   | 😊             |
| Stewart 2005                  | 😊                   | 😊                      | 😞                        | 😞                 | 😞                       | 😊                   | 😊             |
| Steyn 2013                    | 😊                   | 😊                      | 😞                        | 😞                 | 😊                       | 😊                   | 😊             |
| Vedanathan 2019               | 😊                   | 😊                      | 😞                        | 😞                 | 😞                       | 😊                   | 😞             |
| Wahab 2017                    | 😊                   | 😊                      | 😞                        | 😞                 | 😊                       | 😊                   | 😞             |
| <b>Standardized treatment</b> |                     |                        |                          |                   |                         |                     |               |
| Akintunde 2017                | 😞                   | 😊                      | 😊                        | 😊                 | 😞                       | 😊                   | 😞             |
| Okeahialam 2011               | 😊                   | 😊                      | 😞                        | 😊                 | 😞                       | 😊                   | 😞             |
| <b>Physical activity</b>      |                     |                        |                          |                   |                         |                     |               |

1  
2  
3  
4  
5  
6  
7  
8  
9  
10  
11  
12  
13  
14  
15  
16  
17  
18  
19  
20  
21  
22  
23  
24  
25  
26  
27  
28  
29  
30  
31  
32  
33  
34  
35  
36  
37  
38  
39  
40  
41  
42  
43  
44  
45  
46  
47  
48  
49  
50  
51  
52  
53  
54  
55  
56  
57  
58  
59  
60

| Study                                 | Sequence generation | Allocation concealment | Blinding of              |                   | Incomplete outcome data | Selective reporting | Other sources |
|---------------------------------------|---------------------|------------------------|--------------------------|-------------------|-------------------------|---------------------|---------------|
|                                       |                     |                        | personnel / participants | outcome assessors |                         |                     |               |
| Aweto 2012                            |                     |                        |                          |                   |                         |                     |               |
| Lamina 2010                           |                     |                        |                          |                   |                         |                     |               |
| Maruf 2016                            |                     |                        |                          |                   |                         |                     |               |
| Turky 2013                            |                     |                        |                          |                   |                         |                     |               |
| <b>Modified nutrition</b>             |                     |                        |                          |                   |                         |                     |               |
| Charlton 2008                         |                     |                        |                          |                   |                         |                     |               |
| : low; : unclear; : high risk of bias |                     |                        |                          |                   |                         |                     |               |

# BMJ Open

## Non-pharmacological interventions to achieve blood pressure control in African patients: a systematic review

|                                 |                                                                                                                                                                                                                                                                                                                                                                                                                                                                                                                                                                                                                                                                                                                                                                                                                                                                                                                                                                                                                                                                                                                                                                                                            |
|---------------------------------|------------------------------------------------------------------------------------------------------------------------------------------------------------------------------------------------------------------------------------------------------------------------------------------------------------------------------------------------------------------------------------------------------------------------------------------------------------------------------------------------------------------------------------------------------------------------------------------------------------------------------------------------------------------------------------------------------------------------------------------------------------------------------------------------------------------------------------------------------------------------------------------------------------------------------------------------------------------------------------------------------------------------------------------------------------------------------------------------------------------------------------------------------------------------------------------------------------|
| Journal:                        | <i>BMJ Open</i>                                                                                                                                                                                                                                                                                                                                                                                                                                                                                                                                                                                                                                                                                                                                                                                                                                                                                                                                                                                                                                                                                                                                                                                            |
| Manuscript ID                   | bmjopen-2020-048079.R1                                                                                                                                                                                                                                                                                                                                                                                                                                                                                                                                                                                                                                                                                                                                                                                                                                                                                                                                                                                                                                                                                                                                                                                     |
| Article Type:                   | Original research                                                                                                                                                                                                                                                                                                                                                                                                                                                                                                                                                                                                                                                                                                                                                                                                                                                                                                                                                                                                                                                                                                                                                                                          |
| Date Submitted by the Author:   | 27-Oct-2021                                                                                                                                                                                                                                                                                                                                                                                                                                                                                                                                                                                                                                                                                                                                                                                                                                                                                                                                                                                                                                                                                                                                                                                                |
| Complete List of Authors:       | Cernota, Monique; Martin-Luther-Universität Halle-Wittenberg Medizinische Fakultät, Institute of General Practice and Family Medicine, Center of Health Sciences<br>Kroeber, Eric; Martin-Luther-Universität Halle-Wittenberg, Institute of General Practice and Family Medicine, Center of Health Sciences<br>Demeke, Tamiru; Addis Ababa University School of Public Health<br>Frese, T; Martin-Luther-Universität Halle-Wittenberg Medizinische Fakultät, Institute of General Practice and Family Medicine, Center of Health Sciences<br>Getachew, Sefonias; Addis Ababa University School of Public Health<br>Kantelhardt, Eva; Martin-Luther-Universität Halle-Wittenberg Medizinische Fakultät, Institute for Medical Epidemiology, Biostatistics and Informatics, Center of Health Sciences<br>Ngeh, Etienne; Regional Hospital Bamenda, Physiotherapy Department; Research Organization for Health Education and Rehabilitation-Cameroon (ROHER-CAM)<br>Unverzagt, Susanne; Martin-Luther-Universität Halle-Wittenberg Medizinische Fakultät, Institute of General Practice and Family Medicine, Center of Health Sciences; Universität Leipzig Medizinische Fakultät, Department of Primary Care |
| <b>Primary Subject Heading</b>: | Cardiovascular medicine                                                                                                                                                                                                                                                                                                                                                                                                                                                                                                                                                                                                                                                                                                                                                                                                                                                                                                                                                                                                                                                                                                                                                                                    |
| Secondary Subject Heading:      | Global health, General practice / Family practice, Public health                                                                                                                                                                                                                                                                                                                                                                                                                                                                                                                                                                                                                                                                                                                                                                                                                                                                                                                                                                                                                                                                                                                                           |
| Keywords:                       | INTERNAL MEDICINE, PREVENTIVE MEDICINE, Quality in health care < HEALTH SERVICES ADMINISTRATION & MANAGEMENT, PRIMARY CARE, PUBLIC HEALTH, Hypertension < CARDIOLOGY                                                                                                                                                                                                                                                                                                                                                                                                                                                                                                                                                                                                                                                                                                                                                                                                                                                                                                                                                                                                                                       |
|                                 |                                                                                                                                                                                                                                                                                                                                                                                                                                                                                                                                                                                                                                                                                                                                                                                                                                                                                                                                                                                                                                                                                                                                                                                                            |

SCHOLARONE™  
Manuscripts

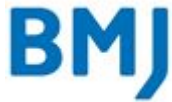

I, the Submitting Author has the right to grant and does grant on behalf of all authors of the Work (as defined in the below author licence), an exclusive licence and/or a non-exclusive licence for contributions from authors who are: i) UK Crown employees; ii) where BMJ has agreed a CC-BY licence shall apply, and/or iii) in accordance with the terms applicable for US Federal Government officers or employees acting as part of their official duties; on a worldwide, perpetual, irrevocable, royalty-free basis to BMJ Publishing Group Ltd ("BMJ") its licensees and where the relevant Journal is co-owned by BMJ to the co-owners of the Journal, to publish the Work in this journal and any other BMJ products and to exploit all rights, as set out in our [licence](#).

The Submitting Author accepts and understands that any supply made under these terms is made by BMJ to the Submitting Author unless you are acting as an employee on behalf of your employer or a postgraduate student of an affiliated institution which is paying any applicable article publishing charge ("APC") for Open Access articles. Where the Submitting Author wishes to make the Work available on an Open Access basis (and intends to pay the relevant APC), the terms of reuse of such Open Access shall be governed by a Creative Commons licence – details of these licences and which [Creative Commons](#) licence will apply to this Work are set out in our licence referred to above.

Other than as permitted in any relevant BMJ Author's Self Archiving Policies, I confirm this Work has not been accepted for publication elsewhere, is not being considered for publication elsewhere and does not duplicate material already published. I confirm all authors consent to publication of this Work and authorise the granting of this licence.

# Non-pharmacological interventions to achieve blood pressure control in African patients: a systematic review

## First Authors:

MD Monique Cernota

Institute of General Practice and Family Medicine, Center of Health Sciences, Martin-Luther-University Halle-Wittenberg, Magdeburger Str. 8, 06112 Halle (Saale), Germany  
[m.cernota78@googlemail.com](mailto:m.cernota78@googlemail.com)

MD Eric Sven Kroeber (**Corresponding Author**)

Institute of General Practice and Family Medicine, Center of Health Sciences, Martin-Luther-University Halle-Wittenberg, Magdeburger Str. 8, 06112 Halle (Saale), Germany  
[Eric.kroeber@uk-halle.de](mailto:Eric.kroeber@uk-halle.de)  
[Eric.kroeber@posteo.de](mailto:Eric.kroeber@posteo.de)

## Coauthors:

Mr. Tamiru Demeke

School of Public Health, College of Health Sciences, Addis Ababa University, Addis Ababa, Ethiopia  
[tamirudemeke@yahoo.com](mailto:tamirudemeke@yahoo.com)

Prof. MD Thomas Frese

Institute of General Practice and Family Medicine, Center of Health Sciences, Martin-Luther-University Halle-Wittenberg, Magdeburger Str. 8, 06112 Halle (Saale), Germany  
[Thomas.frese@uk-halle.de](mailto:Thomas.frese@uk-halle.de)

Mr. Sefonias Getachew

School of Public Health, College of Health Sciences, Addis Ababa University, Addis Ababa, Ethiopia  
[safoget@yahoo.com](mailto:safoget@yahoo.com)

MD Eva Johanna Kantelhardt

Institute of Medical Epidemiology, Biostatistics and Informatics, Center of Health Sciences, Martin-Luther-University Halle-Wittenberg, Magdeburger Str. 8, 06112 Halle (Saale), Germany  
[Eva.kantelhard@uk-halle.de](mailto:Eva.kantelhard@uk-halle.de)

## Last Author:

PhD Susanne Unverzagt

Institute of General Practice and Family Medicine, Center of Health Sciences, Martin-Luther-University Halle-Wittenberg, Magdeburger Str. 8, 06112 Halle (Saale) Germany  
Department of General Practice, University of Leipzig, Faculty of Medicine, Philipp-Rosendahl-Strasse 5, 04103 Leipzig, Germany  
[Susanne.unverzagt@uk-halle.de](mailto:Susanne.unverzagt@uk-halle.de)

## Abstract

**Objectives:** This systematic review aims to evaluate the evidence of non-pharmacological strategies to improve blood pressure (BP) control in hypertensive patients from African countries.

**Design:** We performed a systematic review and searched Medline, Central, CINAHL, and study registers until June 2020 for randomized studies on interventions to decrease BP of patients with hypertension in African countries. We assessed the study quality using the Cochrane risk of bias tool and narratively synthesized studies on non-pharmacological hypertension interventions.

**Setting:** We included studies conducted in African countries.

**Participants:** Adult African patients with a hypertension diagnosis.

**Interventions:** Studies on non-pharmacological interventions aiming to improve BP control and treatment adherence.

**Outcomes:** Main outcomes were BP and treatment adherence.

**Results:** We identified 5564 references, included 23 with altogether 18,153 participants from six African countries. The studies investigated educational strategies to improve adherence (11 studies) and treatment by health care professionals (5 studies), individualized treatment strategies (2 studies), strategies on lifestyle including physical activity (4 studies) and modified nutrition (1 study). Nearly all studies on educational strategies stated improved adherence, but only three studies showed a clinically relevant improvement of BP control. All studies on individualized strategies and lifestyle changes resulted in clinically relevant effects on BP. Due to the type of interventions studied, risk of bias in domain blinding of staff/ participants was frequent (83%). Though incomplete outcome data in 61% of the studies is critical, the general study quality was reasonable.

**Conclusions:** The identified studies offer diverse low-cost interventions including educative and task shifting strategies, individualized treatment, and lifestyle modifications to improve BP control. Especially trialed physical activity interventions show clinically relevant BP changes. All strategies were trialed in African countries and may be used for recommendations in evidence-based guidelines on hypertension in African settings.

**Review registration:** A protocol was registered on PROSPERO (CRD42018075062).

## Strength and limitations of this study

- This systematic review summarizes evidence on a wide range of different non-pharmacological interventions, adding a comprehensive overview to the literature that can support physicians and health care policy makers in the African setting.
- Most of the included studies were conducted in urban areas of few Western and Southern African countries leading to a lack of generalizability to other African regions and showing a need of future research in rural areas.
- A main limitation of this systematic review occurs through deviations from the protocol. Due to the amount of search results for the initially planned more general scope on cardiovascular diseases we decided to focus on hypertension.
- Nevertheless, this review was limited to studies with the highest level of evidence to investigate the benefits and harms of non-pharmacological interventions on blood pressure control in African patients with hypertension.
- This review adds to the scope of a recently published a systematic review on the efficacy of common pharmacological treatment for hypertensive patients in Sub-Saharan Africa.

1  
2  
3 **Keywords:**  
4

5  
6 systematic review, Africa, hypertension, raised blood pressure, non-pharmacological interventions,  
7 randomized controlled trials  
8  
9  
10  
11  
12  
13  
14  
15  
16  
17  
18  
19  
20  
21  
22  
23  
24  
25  
26  
27  
28  
29  
30  
31  
32  
33  
34  
35  
36  
37  
38  
39  
40  
41  
42  
43  
44  
45  
46  
47  
48  
49  
50  
51  
52  
53  
54  
55  
56  
57  
58  
59  
60

For peer review only



## Background

Hypertension is a major public health problem and affects the lives of about 1.13 billion people (1). The highest blood pressure levels shifted from high to low-income countries in South Asia and Sub-Saharan Africa (SSA) (2) with a prevalence of 57 % in older adults in African countries (3, 4). The estimated number of adults with raised blood pressure in SSA rose from 30 million in 1975 to over 100 million in 2016 due to population growth, aging, and westernization of lifestyle (2). Hypertension is a leading risk factor of cardiovascular disease, chronic kidney disease, and diabetes (1). Studies show that black people suffer from more severe forms of hypertension associated with more frequent treatment failure and more severe and earlier target organ damage, all resulting in higher morbidity and mortality (5, 6). Hypertension is a major contributor to devastating health events like stroke or heart failure (7-9), which can be catastrophic to both individuals and healthcare systems in which resources are scarce.

Tackling and reducing the burden of premature mortality due to non-communicable diseases (NCDs) through prevention and treatment has been a designated goal within the UN 2030 Agenda (10). The Pan-African Society of Cardiology developed an algorithm including recommendations on screening, diagnosis, and treatment to achieve 25 % hypertension control in Africa by 2025 with a treatment target value of less than 140/90 mmHg. Screening programs are proposed to be carried out in health care facilities as well as public places like markets and churches. The treatment starts with lifestyle modifications, is intensified through a monotherapy and a subsequent combination of two or three medications in higher stages and resistant forms of hypertension. In some cases, the assessment of secondary causes by specialists is recommended (9).

However, the awareness of hypertension remains relatively low in many parts of Africa, hindering adequate screening, treatment, and control to lower the long-term risks (11-13). Extensive counseling and education of patients and health-care providers on the importance of adherence to medications and lifestyle modifications is necessary in order to improve hypertension control (14, 15). Especially patients with multiple medications benefit from the support of their health care providers to understand the treatment's purpose (16).

Evidence is needed detailing regional differences in hypertension incidences, risk factors, and, as subject of this review, treatment strategies in different, transitioning populations on the African continent. Seeley et al. recently published a systematic review on the efficacy of common pharmacological treatment for hypertensive patients in SSA (17). These interventions do not include treatment strategies like lifestyle modifications (e.g., nutritional modifications, physical activity) or educational strategies, which can be summarized as non-pharmacological interventions (18). The main

1  
2  
3 aim of this systematic review is to summarize the best available evidence on the effectiveness of non-  
4 pharmacological strategies on blood pressure control in African patients with hypertension.  
5  
6  
7  
8  
9  
10  
11  
12  
13  
14  
15  
16  
17  
18  
19  
20  
21  
22  
23  
24  
25  
26  
27  
28  
29  
30  
31  
32  
33  
34  
35  
36  
37  
38  
39  
40  
41  
42  
43  
44  
45  
46  
47  
48  
49  
50  
51  
52  
53  
54  
55  
56  
57  
58  
59  
60

For peer review only

## Main Text

## Methods

A protocol of this systematic review was prospectively registered on PROSPERO (CRD42018075062) following the PRISMA guideline (19) (see Checklist S1). We initially planned to include randomized controlled trials (RCTs) on all cardiovascular diseases (CVDs). Due to the high number and heterogeneity of eligible studies, we decided to focus this review on patients with hypertension as one of the main risk factors for other CVDs. We aim to describe all non-pharmacological hypertension interventions in detail in order to broaden the scope of the existing evidence.

## Patient and public involvement

The conception of this systematic review was discussed in detail with members and students at the Addis Ababa School of Public Health in order to consider the priorities in the African context. Consensus was to gather evidence on hypertension treatment as a measure of tackling the burden of non-communicable diseases which is part of the UN 2030 Agenda (10). No patients were involved.

## Inclusion and exclusion criteria

We included full-text publications on RCTs (20) including cross-over RCTs and cluster RCTs on non-pharmacological interventions with adult hypertensive patients in African countries and reported results on BP. The study aims were improvement of prevention, diagnoses, and treatment of hypertension in African countries. Studies on primary prevention were excluded due to the high variety of possible participants and interventions. International multi-center studies were included if more than 50 % of centers were set in African countries. For detailed inclusion criteria see Table 1.

>>>> Table 1

## Literature search and study selection

Two electronic databases (Medline Ovid, Central) and registers of ongoing and completed studies (International Clinical Trials Registry Platform) were searched to identify all relevant studies (see Additional file 1). We added a search in CINAHL to cover nursing interventions. The main keywords of the search strategy included hypertension, high blood pressure, blood pressure control, Africa, a list

1  
2  
3 of all African countries, and randomized controlled trials. The first searches in 2017 included all CVDs,  
4 while updated strategies were limited to hypertension. The last search was conducted in June 2020.  
5 All searches were done without time frame constrictions. The study selection process was described  
6 in a flow chart according to the PRISMA statement (19). We exported articles retrieved from the  
7 literature search into a reference manager software (EndNote (21)). Duplicate references were  
8 identified in case of congruence of authors, title, year, and journal and deleted.  
9  
10 Titles, abstracts, and full texts of potentially eligible articles were independently screened by three  
11 authors (MC, ESK and SU). Disagreements were resolved through consensus.  
12  
13  
14  
15  
16  
17

## 18 Interventions

19  
20  
21 This systematic review compares non-pharmacological interventions to improve adequate diagnoses,  
22 prevention, and treatment of patients with hypertension with standard care, no intervention or  
23 another, less intensive or frequent intervention (Table 1). Non-pharmacological interventions are  
24 considered non-medication treatment strategies such as educational programs for patients or health  
25 professionals, individualized treatment, physical activity or nutrition modification strategies (18).  
26  
27  
28  
29  
30

## 31 Outcomes

32  
33  
34 The main goal of non-pharmacological interventions for patients with hypertension is to improve  
35 blood-pressure control through the implementation of recommended lifestyle changes, attendance to  
36 follow-up visits, and interventions promoting adherence to take hypertensive medications. We  
37 therefore report results on blood pressure and adherence (Table 1).  
38  
39  
40  
41  
42

## 43 Data extraction and management

44  
45  
46 One author (MC or SU) extracted and a second author (SU or ESK) checked all information on study  
47 design and setting, participants, interventions, and main results by using an assessment form in Excel.  
48 The form was especially designed for this systematic review and piloted for the first five studies.  
49  
50 We extracted information on the publication (study name consisting of the name of first author and  
51 year of the first publication of final results, registration, and additional publications), study  
52 characteristics (design, country and region in which the study was conducted, duration, pre-planned  
53 outcomes), participants (with inclusion/exclusion criteria, randomized sample size, prevention level,  
54 grade of hypertension, mean age, baseline blood pressure), a short description of the intervention  
55 and control groups, and the main results on blood pressure and adherence within the longest follow-  
56 up periods. The grade of hypertension was described as mild (grade 1, 140-159/90-99 mmHg),  
57  
58  
59  
60

1  
2  
3 moderate (grade 2, 160-179/100-109 mmHg) or severe (grade 3,  $\geq 180/\geq 110$  mmHg) (15). If BP was  
4 reported in standing and supine position, we extracted results for supine position.  
5

6  
7 All effect sizes were reported with their corresponding confidence intervals (CI). They were calculated  
8 either on the basis of mean and standard deviation for metric outcomes or by comparing the  
9 frequencies of better adherence or BP control. Positive mean differences (MDs) describe a positive  
10 treatment effect on BP with lower mean values or higher decrease in the intervention group. Relative  
11 risks (RR), hazard ratios (HR) and odds ratios (OR) compare the frequency of good adherence or BP  
12 control. Effect measures greater than 1 describe a better adherence or BP control in the intervention  
13 group.  
14  
15  
16  
17  
18  
19

## 20 Quality assessment and risk of bias

21  
22  
23 Risk of bias was evaluated for all studies based on the Cochrane risk of bias tool (22). Two investigators  
24 (MC or ESK and SU) independently assessed the risk of bias in seven domains (sequence generation,  
25 allocation concealment, blinding of personal and participants, blinding of outcome assessors,  
26 incomplete outcome data, selective outcome reporting, and other sources of bias). Risk of bias due to  
27 selective outcome reporting was judged as low, when the study protocol was available and results on  
28 all pre-planned outcomes were reported. Incomplete outcome data was judged as high, when more  
29 than 10 % of randomized participants dropped out. Other sources of bias were reported to be high in  
30 cases of missing sample size calculation, no definition of the primary endpoint, or no reporting of  
31 baseline values.  
32  
33  
34  
35  
36  
37  
38  
39

## 40 Data synthesis

41  
42  
43 The main aim of this review is a narrative synthesis of studies with their participants, different types  
44 of interventions, and resulting outcomes. We added a figure visualizing the effect sizes on BP of  
45 different types of interventions in forest plots using RevMan (23). Due to the high clinical  
46 heterogeneity between included studies with their different settings, interventions, control groups,  
47 and lengths of follow-up, we did not pool any results.  
48  
49

50  
51 Treatment effects were described as statistically significant or clinically relevant. Statistically significant  
52 results on BP with MD over 5 mmHg were defined as clinically relevant.  
53  
54  
55  
56  
57  
58  
59  
60

## Results

We identified a total of 5564 references from electronic databases and 18 references from the International Clinical Trials registry platform. 340 articles were potentially eligible and full texts were assessed for the inclusion and exclusion criteria. Of those, 298 articles were excluded including 13 articles on studies to treat heart failure, 7 articles on coronary heart diseases, and 76 articles on pharmacotherapy for hypertension (see list of excluded studies in the supplemental material). Twenty-three studies (reported in 42 articles) (24-66) on non-pharmacological strategies to treat patients with hypertension matched the inclusion criteria and were included in this systematic review (Figure 1 and list of included studies in the supplemental material). The characteristics and main results of these studies were summarized in Table 2.

>>>> Figure 1

### Study characteristics

We identified 15 studies with two or more independent parallel groups and individual randomization of patients and eight cluster-RCTs with randomization of different observation units, such as independent villages, health-care facilities, or different geographical regions (Table 2). Most of the included studies were conducted in Nigeria (11 studies) and South Africa (8 studies), others in Ghana, Kenya, Cameroon and Egypt. One of the studies (Akintunde 2017) (25) recruited patients in three countries (South Africa, Nigeria and Kenya). Nine studies (39 %) were at least partly conducted in rurally located health-care facilities (Figure 2) (24, 27, 32, 34, 35, 36, 52, 56, 64). The included studies were published between 1991 and 2019. Only three of the studies, all conducted South Africa, were published before 2010 (31, 60, 61).

>>>> Figure 2

### Participants

The total sample size ranged from 30 to 4722 participants with a total number of 18,153 participants (Table 2). Eighteen studies (78 %) randomized more than 100 participants. The mean age was between 45 and 63 years. Most studies (n=19) included more females. Two studies to enhance physical activity included women (Turky 2013) (63) or men (Lamina 2010) (37) only. Mean systolic blood pressure (SBP) at baseline was between 128 and 175 mmHg, mean diastolic blood pressure (DBP) between 76 and

1  
2  
3 117 mmHg. Most studies included patients in secondary prevention with mild to moderate  
4 hypertension. Three studies (56, 58, 66) included hypertensive patients post stroke.  
5  
6  
7

## 8 Intervention

9

10  
11 Studies investigated educational strategies to improve adherence of patients and treatment by health  
12 care professionals (16 studies), to individualize treatment (2 studies), and to change lifestyle via  
13 enhanced physical activity (4 studies) or modified nutrition (1 study) (Table 2).  
14  
15  
16

17  
18  
19 >>>> Table 2  
20  
21

### 22 *Educational strategies to improve adherence*

23  
24 Sixteen studies (17,090 participants), with follow-up periods from two weeks in a short-term feasibility  
25 study (Wahab 2017) (66) up to 18 months (Goudge 2018) (34), were published between 1991 and  
26 2019.  
27  
28

29 The main aim of eleven studies was the improvement of patients' knowledge on hypertension and  
30 adherence to self-monitoring of BP, recommendations on medication, lifestyle changes, and regular  
31 attendance at health-care facilities (24, 27-29, 36, 56, 58, 60, 61, 64, 66). Five studies investigated  
32 strategies to improve adequate treatment of hypertensive patients by clinicians, nurses, and health-  
33 care workers (32, 34, 35, 52, 62).  
34  
35

36 Eight studies (27, 28, 36, 56, 58, 60, 61, 64) investigated the efficacy of adherence-promotion via  
37 counselling and phone or letter-based interventions. Seven studies (24, 29, 32, 34, 35, 52, 66)  
38 investigated the efficacy of interventions on the basis of training measures with subsequent task-  
39 shifting to nurses or health workers for home visits and patient education. One study (Steyn 2013) (62)  
40 tested a multi-faced intervention to implement national South-African guidelines into primary care of  
41 patients with hypertension or diabetes. Another two studies investigated the efficacy of financial  
42 incentives as an additional health insurance coverage (Gyamfi 2017) (35) or free treatment (Labhardt  
43 2011) (36), respectively.  
44  
45

46 Nearly all studies stated improved medication adherence (24, 28, 29, 36, 60, 61), implementation of  
47 lifestyle recommendations (Ayodapo 2019, Mendis 2010) (27, 52), linkage to care (36, 52, 64), or  
48 knowledge and practical skills of healthcare professionals (Fairall 2016, Gyamfi 2017) (32, 35). In only  
49 three studies (27-29), these improvements resulted in modest benefits on BP (Table 2 and Figure 3A  
50 to 3C). In the study by Ayodapo 2019 (27), counseling had a positive impact on lifestyle behavior and  
51 resulted in a clinically relevant decrease of mean arterial BP (-9.8 mmHg; 95 %CI -11.5 to -8.1). (Bobrow  
52 2016) (28) assessed the effect of automated treatment adherence support delivered via mobile phone  
53  
54  
55  
56  
57  
58  
59  
60

1  
2  
3 short messages. Bolarinwa 2019 (29) trialed home-based follow-up care with education and counseling  
4 of patients and modifications of environmental characteristics. Both studies achieved a 12 % higher BP  
5 control with SBP<140 mmHg and DBP< 90 mmHg in participants of the intervention compared to the  
6 control groups (RR: 1.12; 95 % CI 1.01 to 1.23 and 1.12; 95 % CI 1.00 to 1.25) (Figure 3).  
7  
8  
9

10  
11 >>>> Figure 3  
12

### 13 14 15 *Individualized treatment strategies*

16 Two studies (286 participants) with follow-up periods of 3 and 12 months were published in 2011 and  
17 2017 (Akintunde 2017, Okeahialam 2011) (25, 55). Both investigated strategies on the efficacy of an  
18 individualized therapy. Therapy individualization based on the patients' renin/aldosterone profile  
19 (Akintunde 2017) (25) resulted in more appropriate prescriptions and a relevant decrease of SBP (MD:  
20 -13.2 mmHg; 95 % CI -19.4 to -7.0) and DBP (MD: -5.6; 95 % CI -9.4 to -1.8) in patients with uncontrolled  
21 hypertension. The second study (Okeahialam 2011) (55) showed a higher reduction of DBP in patients  
22 using their anti-hypertensives at night compared to a morning intake (MD: -6.9 mmHg; 95 % CI -10.4  
23 to -3.4) but stated no change in SBP (Table 2).  
24  
25  
26  
27  
28  
29  
30  
31  
32

### 33 34 *Strategies with physical activity*

35 Four studies (26, 37, 51, 63) (685 participants), published between 2010 and 2016, investigated the  
36 BP-lowering effect of different aerobic training strategies over 4 to 12 weeks. Enhanced physical  
37 activities were performed two or three times a week and included dance training (Aweto 2012, Maruf  
38 2016) (26, 51) and exercise training on an ergometer (Lamina 2010) (37) or treadmill (Turky 2013) (63).  
39 All studies stated a clinically relevant benefit with mean reductions of SBP between 21 and 7.1 mmHg  
40 and DBP between 10 and 1.4 mmHg (Figure 4). The highest BP decrease was achieved in a study on  
41 the effect of moderate aerobic exercise training by walking on a treadmill in postmenopausal  
42 hypertensive women (Turky 2013) (63) (MD: -21 mmHg; 95 %-CI 25.8 to -16.2).  
43  
44  
45  
46  
47  
48  
49

50 >>>> Figure 4  
51

### 52 53 *Modified nutrition strategies*

54 Charlton 2008 (31) tested a food-based dietary strategy (reduced salt consumption) in 92 mildly to  
55 moderately hypertensive patients from a low socio-economic background, stating a clinically relevant  
56 decrease in SBP after two months (MD: -6.2 mmHg; 95 % CI -11.4 to -0.9), but no effect on DBP (Table  
57 2).  
58  
59  
60



## Potential biases

The greatest restriction of study quality was a high risk of bias in the blinding of staff and study participants in 19 studies. Especially educational strategies were not examined in double-blinded studies, however three of these studies (34, 56, 58) reported a quality assurance against detection bias with blinded measurement of blood pressure. Two studies on physical activity enhancement in comparison to usual care (Lamina 2010, Maruf 2016) (37, 51) were described as double-blinded without reporting further details. Only the study on modified nutrition (Charlton 2008) (31) adequately reported detailed methods to ensure blinding of participants and fieldworkers. Another frequent problem was incomplete outcome data in 14 studies with loss to follow-up over 10 % of randomized participants or per-protocol analyses. Selective reporting was checked in all 13 studies with a published protocol. Of those, five studies (29, 35, 36, 51, 56) did not report all pre-planned outcomes. Problems concerning randomization were identified in three studies with a non-random component in sequence generation or allocation concealment (25, 37, 52). Other sources of bias include missing sample-size calculations, reporting of intermediate results only, and relevant differences at baseline in nine studies (Table 3, Figure 5) (24, 25, 26, 29, 51, 55, 63, 64, 66).

>>>> Table 3

>>>> Figure 5

## Discussion

This systematic review describes interventions and treatment effects of 23 studies with a total of 18,153 participants with hypertension from six African countries. Most of the studies investigated successful low-cost concepts to improve BP control through improved adherence to medical treatment and lifestyle changes.

While lower- and middle-income countries' CVD-mortality remained unchanged over the last decades, high-income countries have reduced the CVD-mortality by more than 50 % since 1990 (67), largely by using country-specific guidelines, evidence-based policy interventions to reduce risk-factor levels, strengthening the health system at the primary-care level, and improving acute care with attention to early initiation of treatment. However, policies to reduce population-wide risk factors of hypertension have not been widely adopted in low- and middle-income countries (68).

Pharmacotherapy with the well-established anti-hypertensive medications is the mainstay of hypertension management (15, 69). Nevertheless, treatment recommendations on adherence to medication and changed lifestyle habits are often only incompletely applied in practice (70-72). Patients are frequently unwilling to take drugs due to possible side effects. They may benefit from adequate knowledge as well as a higher motivation to take their prescribed medications and to implement sustainable lifestyle changes (73-75). Despite the frequent lack of acute symptoms, uncontrolled BP may result in severe long-term outcome and increased mortality. The risk increases in cases of inadequate treatment and low patient adherence as well as inconsistent follow-up on BP control (7). Therefore, all strategies with the aim to increase knowledge, awareness, and adherence are essential to lowering BP levels and improving the prognoses of patients (69, 76). Due to the short-term follow-up, no study reported long-term outcomes on mortality, and we interpreted available results on BP changes and treatment adherence.

Several strategies to improve health related behavior concerning hypertension with convincing results were examined. We identified eight studies that investigated the efficacy of phone or letter-based interventions (e.g., via short message service) to improve knowledge on hypertension, with adherence support or reminder letters for follow-up (27, 28, 36, 56, 58, 60, 61, 64). All these studies showed strong effects of the intervention concerning self-reported behavioral changes, but only two of these studies showed improved BP during follow-up (Ayodapo 2019, Bobrow 2016) (27, 28). Three studies (29, 35, 52) reported improved adherence and two of those a decreased BP level through nurse-led interventions (Bolarinwa 2019, Mendis 2010) (29, 52). These studies demonstrated the efficacy of task-shifting interventions in a low-resource setting. Furthermore, low-cost interventions suited to the environment, including financial incentives for adherent patients with minimal additional resources,

1  
2  
3 can significantly improve the adherence of patients (Labhardt 2011) (36) and thus potentially influence  
4 BP control.  
5

6 Even though cost-effective interventions are globally available, there are major gaps in their  
7 implementation, particularly in limited resource settings (68). Two large multi-level studies that  
8 combined phone or letter-based interventions with task-shifting to nurses or health workers were not  
9 successful in achieving a relevant improvement in adherence and BP control (Fairall 2016, Goudge  
10 2018) (32, 34). On the other hand, no harm was observed after the expansion of the nurses' roles  
11 (Fairall 2016) (32). Thus, the intervention might be a practical and acceptable tool to expand the scope  
12 of non-physician clinicians into primary care of patients with common NCDs. There is a generally good  
13 access to essential medications in four countries where the included studies have been conducted  
14 (South Africa, Egypt, Kenya and Ghana). The access is not as widespread in Cameroon and Nigeria (77).  
15 Nevertheless, one study conducted in rural parts of South Africa between 2014 to 2015 (goudge 2018)  
16 (34) reported insufficient or unavailable equipment and medication shortage. Moreover, increasing  
17 numbers of NCD patients require an adequate number of nursing personnel as well as health care  
18 facilities. Similar factors contributed to the poor results of the implementation of national guidelines  
19 in resource-scarce primary health care settings in South Africa (62), which did not show improved  
20 outcomes in hypertension and diabetes patients. In studies with follow-up-periods of less than one  
21 year, the time frame might have been too short to reach a clinically relevant BP control through  
22 improved knowledge and awareness, since lifestyle changes are oftentimes challenging and should be  
23 applied over a long time (24, 61, 66). Generally, the results of the systematic review are consistent  
24 with existing evidence on the importance of long-acting patient centered interventions. Unfortunately,  
25 these interventions do not reach all patients and often, a full benefit of medical treatment on clinically  
26 important outcomes cannot be achieved (78).  
27  
28  
29  
30  
31  
32  
33  
34  
35  
36  
37  
38  
39  
40

41 Most studies in this review included participants in secondary prevention with mild to moderate  
42 hypertension. In contrast, observational studies and conclusions from a systematic review on  
43 pharmacological treatment generally concerned participants with higher grades of hypertension (5, 7,  
44 79). Interventions for patients with severe or uncontrolled hypertension and potentially target-organ  
45 damage are underrepresented. Interventions for high-risk patients are especially necessary due to the  
46 high frequency of late first diagnosis (7) and high prevalence of severe forms of hypertension at an  
47 early age in African patients (6). A multi-center study on patients with uncontrolled hypertension in  
48 clinics in Nigeria, Kenya, and South Africa stated the efficacy of an individualized therapy based on  
49 phenotyping with plasma renin and aldosterone to improve BP control (Akintunde 2017) (25). The  
50 researchers suggest testing this approach in African Americans and patients of any race with therapy-  
51 resistant hypertension. Three studies (56, 58, 66) investigated the implementation of multi-level  
52 approaches including educational, telephone-based, nurse-led, self-management supporting  
53  
54  
55  
56  
57  
58  
59  
60

1  
2  
3 interventions, as well as BP monitoring for stroke survivors. These studies were not successful in  
4 sufficiently improving BP control, possibly due to short follow-up periods.

5  
6 Regarding the different grades of hypertension, low risk patients with grade 1 hypertension benefit  
7 from lifestyle modifications including regular physical activity, sodium restriction, weight reduction,  
8 smoking cessation, moderation of alcohol consumption, and other dietary changes. These are  
9 recommended as initial strategies to reduce BP levels in order to prevent or delay the use of  
10 pharmacotherapy (14, 15). Nevertheless, even for patients with higher grades of hypertension,  
11 lifestyle modifications remain important in addition to pharmacotherapy (14, 15, 69, 80). The clinically  
12 accepted relevant BP lowering effect of medium-to high-intensity physical activity as a single or  
13 additive treatment for hypertension (81) was demonstrated in four of the included studies (26, 37, 51,  
14 63). Only one study from South Africa investigated the effect of a modified nutrition strategy  
15 (reduction of salt intake) and stated a clinically relevant effect on SBP (Charlton 2008) (31). To the  
16 authors' knowledge, no randomized study investigated the efficacy of other recommended lifestyle  
17 interventions, like smoking cessation or weight reduction, in hypertensive patients in an African  
18 country.  
19  
20  
21  
22  
23  
24  
25  
26  
27  
28

## 29 Strengths and Limitations of this Review

30  
31  
32  
33 We were able to generate evidence on a wide range of different non-pharmacological interventions,  
34 adding a comprehensive overview to the literature that can support physicians and health care policy  
35 makers in the African setting.  
36

37  
38 A main limitation occurs through deviations from the protocol. We planned a comprehensive summary  
39 of all RCTs to prevent, diagnose, and treat patients with cardiovascular diseases in African countries.  
40 Due to a high number of eligible studies in the first systematic search, we decided to focus on published  
41 studies on hypertension. We therefore had to change the pre-planned outcomes and instead focus on  
42 BP and additionally describe results on medication adherence and lifestyle changes. The pre-planned  
43 outcomes mortality, NYHA, and hospital admission were dropped. Due to the recently published  
44 systematic review by Seeley et al. (17), this publication describes non-pharmacological strategies. The  
45 complete results, including pharmacological interventions, were summarized in a doctoral thesis paper  
46 (82).  
47  
48  
49  
50  
51

52  
53 Nevertheless, this review was limited to studies with the highest level of evidence to investigate the  
54 benefits and harms of non-pharmacological interventions for hypertension. The randomized allocation  
55 ensures the comparability of participants across intervention groups. However, the unfeasibility of  
56 double-blinding might restrict the internal validity of results.  
57  
58  
59  
60

1  
2  
3 The external validity might be limited by our restriction to studies published in the English language  
4 and the disproportionately high number of studies conducted in urban areas in some Western and  
5 Southern African countries. According to the United Nations, there are currently 54 African countries.  
6 RCTs have been conducted in only six of those countries. Inhabitants of these countries (approximately  
7 480 million) represent only a fraction of the African population of about 1.34 billion (83). Especially  
8 Central and Northern Africa were underrepresented. There are high levels of diversity within and  
9 between African populations. Subpopulations with genetic variants are living in geographically distant  
10 areas with specific local lifestyle or environmental conditions, which may be associated with a  
11 susceptibility to specific NCDs (84). Therefore, it is uncertain whether our results can be extrapolated  
12 to patients living in other areas than those studied. A significant amount of the African population lives  
13 in rural areas while the majority of studies was conducted in urban settings. However, it is crucial to  
14 make health service available as close as possible to the population in order to achieve the most  
15 comprehensive care. Thus, research on non-pharmacological interventions such as educational  
16 strategies to improve adherence and lifestyle modification should be expanded across all parts of  
17 Africa. Research must be conducted especially in rural areas to ensure a higher generalizability, quality  
18 of services, and resulting improvement of the African peoples' health.  
19  
20  
21  
22  
23  
24  
25  
26  
27  
28  
29  
30  
31  
32  
33  
34  
35  
36  
37  
38  
39  
40  
41  
42  
43  
44  
45  
46  
47  
48  
49  
50  
51  
52  
53  
54  
55  
56  
57  
58  
59  
60

## Conclusion

This systematic review shows that even though hypertension is a critical health problem, there are still few randomized studies on non-pharmacological treatment of hypertension conducted on the African continent. Available studies do not represent all Africans since they were conducted in only six countries, many in urban settings only. It is advisable to plan and implement studies on patients with hypertension and health-care professionals in rural areas as well as Northern and Central African countries.

An improvement in the prognosis of patients with high BP in Africa requires the implementation of practical and effective solutions to diagnose, treat and control hypertension in specific settings (9). The identified studies describe diverse approaches tested in African countries that may be used to generate local African evidence-based guidelines on hypertension treatment. Especially trialed physical activity interventions and individualized treatment strategies show clinically relevant BP changes. Educational strategies for patients and medical personnel show mixed results and offer a comprehensive insight into trialed approaches as well as a basis for future research opportunities. This review summarizes miscellaneous low-cost interventions including task shifting, education, individualized treatment and lifestyle modifications to improve BP control.

## List of abbreviations

|     |                             |
|-----|-----------------------------|
| BP  | Blood pressure              |
| CI  | Confidence interval         |
| CVD | Cardiovascular disease      |
| DBP | Diastolic blood pressure    |
| HR  | Hazard ratio                |
| MD  | Mean difference             |
| NCD | Non-communicable disease    |
| OR  | Odds ratio                  |
| RCT | Randomized controlled trial |
| RR  | Relative Risk               |
| SBP | Systolic blood pressure     |
| SSA | Sub-Saharan Africa          |

## Declarations

### Ethics approval and consent to participate

No ethics approval and consent to participate was necessary.

### Consent for publication

Not applicable.

### Availability of data and materials

Please find the search strategy and a list of included studies in the supplementary material.

### Competing interests

The authors declare that they have no competing interests.

### Funding

This research received no specific grant from any funding agency in the public, commercial or non-profit sector.

### Author contributions

MC

Involved in all steps to plan this systematic review including the protocol; wrote the draft of this manuscript; screening of titles, abstracts, and full texts, data extraction, quality assessment.

ESK

Wrote the draft of this manuscript; screening of titles, abstracts and full texts, data extraction, quality assessment of the last update; submission of the manuscript.

TD

Involved in all steps to plan this systematic review including the protocol; provided expertise and discussed the results in the African context, commented on the manuscript.

TF

Provided expertise on primary care aspects of hypertension treatment, discussed the results, commented on the manuscript.

SG

Provided expertise on CVD epidemiology and public health, discussed the results in the African context, commented on the manuscript.

EJK

Involved in all steps to plan this systematic review including the protocol; provided expertise on the needs of evidence in the African context, commented on the manuscript.



1  
2  
3 EN

4 Provided expertise on public health and African guideline work, discussed the results in the African  
5 context, commented on the manuscript, provided expertise and discussed the reviewer comments  
6 and supported the draft of the revised manuscript.  
7

8  
9 SU

10 Involved in all steps to plan this systematic review including the protocol; wrote the draft of this  
11 manuscript, systematic search, screening of titles, abstracts and full texts, data extraction, quality  
12 assessment, submission of the manuscript  
13  
14

## 15 Acknowledgements

16  
17 Not applicable.  
18  
19  
20  
21  
22  
23  
24  
25  
26  
27  
28  
29  
30  
31  
32  
33  
34  
35  
36  
37  
38  
39  
40  
41  
42  
43  
44  
45  
46  
47  
48  
49  
50  
51  
52  
53  
54  
55  
56  
57  
58  
59  
60

For peer review only

## References

1. Danaei G, Lu Y, Singh GM, Carnahan E, Stevens GA, Cowan MJ, et al. Cardiovascular disease, chronic kidney disease, and diabetes mortality burden of cardiometabolic risk factors from 1980 to 2010: a comparative risk assessment. *Lancet Diabetes & Endocrinology*. 2014;634-47.
2. WHO. Worldwide trends in blood pressure from 1975 to 2015: a pooled analysis of 1479 population-based measurement studies with 19.1 million participants. *Lancet*. 2017;389(10064):37-55.
3. Kaze AD, Schutte AE, Erqou S, Kengne AP, Echouffo-Tcheugui JB. Prevalence of hypertension in older people in Africa: a systematic review and meta-analysis. *J Hypertens*. 2017;35(7):1345-52.
4. Bosu WK, Reilly ST, Aheto JMK, Zucchelli E. Hypertension in older adults in Africa: A systematic review and meta-analysis. *PLoS One*. 2019;14(4):e0214934.
5. Brewster LM, Seedat YK. Why do hypertensive patients of African ancestry respond better to calcium blockers and diuretics than to ACE inhibitors and beta-adrenergic blockers? A systematic review. *BMC Med*. 2013;11:141.
6. Brewster LM, van Montfrans GA, Oehlers GP, Seedat YK. Systematic review: antihypertensive drug therapy in patients of African and South Asian ethnicity. *Intern Emerg Med*. 2016;11(3):355-74.
7. Oladapo OO, Salako L, Sadiq L, Shoyinka K, Adedapo K, Falase AO. Target-organ damage and cardiovascular complications in hypertensive Nigerian Yoruba adults: a cross-sectional study. *Cardiovasc J Afr*. 2012;23(7):379-84.
8. Nelissen HE, Hendriks ME, Wit FW, Bolarinwa OA, Osagbemi GK, Bindraban NR, et al. Target organ damage among hypertensive adults in rural Nigeria: a cross-sectional study. *J Hypertens*. 2014;32(3):487-94.
9. Dzudie A, Rayner B, Ojji D, Schutte AE, Twagirumukiza M, Damasceno A, et al. Roadmap to achieve 25% hypertension control in Africa by 2025. *Cardiovasc J Afr*. 2017;28(4):262-72.
10. Nations U. Sustainable development goals. Goal 3: Ensure healthy living and promote well-being for all at all ages 2019 [Available from: <https://www.un.org/sustainabledevelopment/health/>].
11. Gomez-Olive FX, Ali SA, Made F, Kyobutungi C, Nonterah E, Micklesfield L, et al. Regional and Sex Differences in the Prevalence and Awareness of Hypertension: An H3Africa AWI-Gen Study Across 6 Sites in Sub-Saharan Africa. *Glob Heart*. 2017;12(2):81-90.
12. Lloyd-Sherlock P, Beard J, Minicuci N, Ebrahim S, Chatterji S. Hypertension among older adults in low- and middle-income countries: prevalence, awareness and control. *International Journal of Epidemiology*. 2014;43(1):116-28.
13. Guwatudde D, Nankya-Mutyoba J, Kalyesubula R, Laurence C, Adebamowo C, Ajayi I, et al. The burden of hypertension in sub-Saharan Africa: a four-country cross sectional study. *BMC Public Health*. 2015;15:1211.
14. Whelton PK, Carey RM, Aronow WS, Casey DE, Jr., Collins KJ, Dennison Himmelfarb C, et al. 2017 ACC/AHA/AAPA/ABC/ACPM/AGS/APhA/ASH/ASPC/NMA/PCNA Guideline for the

1  
2  
3  
4 Prevention, Detection, Evaluation, and Management of High Blood Pressure in Adults: Executive  
5 Summary: A Report of the American College of Cardiology/American Heart Association Task Force  
6 on Clinical Practice Guidelines. *Hypertension*. 2018;71(6):1269-324.

7  
8 15. Williams B, Mancia G, Spiering W, Agabiti Rosei E, Azizi M, Burnier M, et al. 2018 ESC/ESH  
9 Guidelines for the management of arterial hypertension. *Eur Heart J*. 2018;39(33):3021-104.

10  
11 16. Fredericksen RJ, Gibbons L, Brown S, Edwards TC, Yang FM, Fitzsimmons E, et al.  
12 Medication understanding among patients living with multiple chronic conditions: Implications for  
13 patient-reported measures of adherence. *Res Social Adm Pharm*. 2018;14(6):540-4.

14  
15 17. Seeley A, Prynne J, Perera R, Street R, Davis D, Etyang AO. Pharmacotherapy for hypertension  
16 in Sub-Saharan Africa: a systematic review and network meta-analysis. *BMC Medicine*. 2020;18:1-11.

17  
18 18. Mahmood S, Shah KU, Khan TM, Nawaz S, Rashid H, Baqar SWA, et al. Non-pharmacological  
19 management of hypertension: in the light of current research. *Irish Journal of Medical Science (1971-)*.  
20 2019;188(2):437-52.

21  
22 19. Moher D, Liberati A, Tetzlaff J, Altman DG. Preferred reporting items for systematic reviews  
23 and meta-analyses: the PRISMA statement. *PLoS Med*. 2009;6(7):e1000097.

24  
25 20. Boutron I, Altman DG, Moher D, Schulz KF, Ravaut P. CONSORT Statement for Randomized  
26 Trials of Nonpharmacologic Treatments: A 2017 Update and a CONSORT Extension for  
27 Nonpharmacologic Trial Abstracts. *Ann Intern Med*. 2017;167(1):40-7.

28  
29 21. Team TE. EndNote. EndNote X9 ed. Philadelphia, PA: Clarivate; 2013.

30  
31 22. Higgins JP, Altman DG, Gøtzsche PC, Jüni P, Moher D, Oxman AD, et al. The Cochrane  
32 Collaboration's tool for assessing risk of bias in randomised trials. *BMJ*. 2011;343:d5928.

33  
34 23. Centre; TNC. Review Manager (RevMan) [Computer program]. Version 5.3. In:  
35 Collaboration. Copenhagen TC, editor. 2014.

36  
37 24. Adeyemo A, Tayo BO, Luke A, Ogedegbe O, Durazo-Arvizu R, Cooper RS. The Nigerian  
38 antihypertensive adherence trial: a community-based randomized trial. *Journal of Hypertension*.  
39 2013;31(1):201-7.

40  
41 25. Akintunde A, Nondi J, Gogo K, Jones ESW, Rayner BL, Hackam DG, et al. Physiological  
42 Phenotyping for Personalized Therapy of Uncontrolled Hypertension in Africa. *Am J Hypertens*.  
43 2017;30(9):923-30.

44  
45 26. Aweto HA, Owoeye OB, Akinbo SR, Onabajo AA. Effects of dance movement therapy on  
46 selected cardiovascular parameters and estimated maximum oxygen consumption in hypertensive  
47 patients. *Nigerian quarterly journal of hospital medicine [Internet]*. 2012; 22(2):[125-9 pp.].

48  
49 27. Ayodapo AO, Olukokun TAV. Lifestyle counselling and behavioural change: role among adult  
50 hypertensives in a rural tertiary institution. *South African Family Practice*. 2019;61(3):91-6.

51  
52 28. Bobrow K, Farmer AJ, Springer D, Shanyinde M, Yu LM, Brennan T, et al. Mobile Phone Text  
53 Messages to Support Treatment Adherence in Adults With High Blood Pressure (SMS-Text Adherence  
54 Support [StAR]): A Single-Blind, Randomized Trial. *Circulation*. 2016;133(6):592-600.

- 1  
2  
3  
4 29. Bolarinwa OA, Juni MH, Nor Afiah MZ, Salmiah MS, Akande TM. Mid-term impact of home-based follow-up care on health-related quality of life of hypertensive patients at a teaching hospital in Ilorin, Nigeria. *Niger J Clin Pract.* 2019;22(1):69-78.
- 5  
6  
7  
8 30. Cappuccio FP, Kerry SM, Micah FB, Plange-Rhule J, Eastwood JB. A community programme to reduce salt intake and blood pressure in Ghana [ISRCTN88789643]. *BMC Public Health.* 2006;6:13.
- 9  
10  
11 31. Charlton KE, Steyn K, Levitt NS, Peer N, Jonathan D, Gogela T, et al. A food-based dietary strategy lowers blood pressure in a low socio-economic setting: a randomised study in South Africa.[Erratum appears in *Public Health Nutr.* 2009 Feb;12(2):284]. *Public Health Nutrition.* 2008;11(12):1397-406.
- 12  
13  
14  
15  
16  
17 32. Fairall LR, Folb N, Timmerman V, Lombard C, Steyn K, Bachmann MO, et al. Educational Outreach with an Integrated Clinical Tool for Nurse-Led Non-communicable Chronic Disease Management in Primary Care in South Africa: A Pragmatic Cluster Randomised Controlled Trial. *PLoS Medicine / Public Library of Science.* 2016;13(11):e1002178.
- 18  
19  
20  
21  
22  
23 33. Folb N, Timmerman V, Levitt NS, Steyn K, Bachmann MO, Lund C, et al. Multimorbidity, control and treatment of noncommunicable diseases among primary healthcare attenders in the Western Cape, South Africa. *S Afr Med J.* 2015;105(8):642-7.
- 24  
25  
26  
27  
28 34. Goudge J, Chirwa T, Eldridge S, Gómez-Olivé FFX, Kabudula C, Limbani F, et al. Can lay health workers support the management of hypertension? Findings of a cluster randomised trial in South Africa. *BMJ Glob Health.* 2018;3(1):e000577.
- 29  
30  
31  
32  
33 35. Gyamfi J, Plange-Rhule J, Iwelunmor J, Lee D, Blackstone SR, Mitchell A, et al. Training nurses in task-shifting strategies for the management and control of hypertension in Ghana: a mixed-methods study. *BMC Health Serv Res.* 2017;17(1):104.
- 34  
35  
36  
37 36. Labhardt ND, Balo JR, Ndam M, Manga E, Stoll B. Improved retention rates with low-cost interventions in hypertension and diabetes management in a rural African environment of nurse-led care: a cluster-randomised trial. *Tropical Medicine & International Health.* 2011;16(10):1276-84.
- 38  
39  
40  
41  
42 37. Lamina S. Effects of continuous and interval training programs in the management of hypertension: a randomized controlled trial. *The Journal of Clinical Hypertension [Internet].* 2010; 12(11):[841-49 pp.].
- 43  
44  
45  
46 38. Lamina S. Comparative effect of interval and continuous training programs on serum uric acid in management of hypertension: a randomized controlled trial. *Journal of Strength & Conditioning Research.* 2011;25(3):719-26.
- 47  
48  
49  
50  
51 39. Lamina S, Okoye CG. Effect of low intensity continuous training programme on serum uric acid in the non pharmacological management of hypertension: a randomized controlled trial. *Nigerian journal of medicine : journal of the national association of resident doctors of nigeria [Internet].* 2010; 19(1):[77- 86 pp.].
- 52  
53  
54  
55  
56  
57 40. Lamina S, Okoye CG. Uricemia as a cardiovascular events risk factor in hypertension: the role of interval training programme in its downregulation. *Journal of the Association of Physicians of India.* 2011;59:23-8.
- 58  
59  
60

- 1  
2  
3  
4 41. Lamina S, Okoye CG. Effect of interval training program on white blood cell count in the  
5 management of hypertension: A randomized controlled study. *Nigerian Medical Journal* [Internet].  
6 2011; 52(4):[271-7 pp.].
- 7  
8 42. Lamina S, Okoye CG, Dagogo TT. Managing erectile dysfunction in hypertension: the effects  
9 of a continuous training programme on biomarker of inflammation. *BJU international* [Internet]. 2009;  
10 103(9):[1218-21 pp.].
- 11  
12 43. Lamina S, Okoye CG, Dagogo TT. Therapeutic effect of an interval exercise training program  
13 in the management of erectile dysfunction in hypertensive patients. *Journal of clinical hypertension*  
14 (greenwich, conn) [Internet]. 2009; 11(3):[125-9 pp.].
- 15  
16 44. Lamina S, Okoye CG, Hanif SM. Randomised controlled trial: effects of aerobic exercise  
17 training programme on indices of adiposity and metabolic markers in hypertension. *JPMA - Journal of*  
18 *the Pakistan Medical Association*. 2013;63(6):680-7.
- 19  
20 45. Lamina S, Okoye CG, Hanif SM. Effects of interval exercise training programme on the indices  
21 of adiposity and biomarker of inflammation in hypertension: a randomised controlled trial. *Nigerian*  
22 *Postgraduate Medical Journal*. 2014;21(2):136-43.
- 23  
24 46. Lamina S, Okoye G. Effects of aerobic exercise training on psychosocial status and serum uric  
25 Acid in men with essential hypertension: a randomized controlled trial. *Annals of Medical & Health*  
26 *Sciences Research*. 2012;2(2):161-8.
- 27  
28 47. Lamina S, Okoye GC. Therapeutic effect of a moderate intensity interval training program on  
29 the lipid profile in men with hypertension: a randomized controlled trial. *Nigerian journal of clinical*  
30 *practice* [Internet]. 2012; 15(1):[42-7 pp.].
- 31  
32 48. Lamina S, Okoye GC. Effect of interval exercise training programme on C-reactive protein in  
33 the non-pharmacological management of hypertension: a randomized controlled trial. *African journal*  
34 *of medicine and medical sciences* [Internet]. 2012; 41(4):[379-86 pp.]. Available from:  
35 <http://onlinelibrary.wiley.com/o/cochrane/clcentral/articles/365/CN-00863365/frame.html>.
- 36  
37 49. Leon N, Surender R, Bobrow K, Muller J, Farmer A. Improving treatment adherence for blood  
38 pressure lowering via mobile phone SMS-messages in South Africa: a qualitative evaluation of the  
39 SMS-text Adherence Support (StAR) trial. *BMC Family Practice*. 2015;16:80.
- 40  
41 50. Maruf FA, Akinpelu AO, Salako BL. Self-reported quality of life before and after aerobic  
42 exercise training in individuals with hypertension: a randomised-controlled trial. *Applied Psychology*  
43 *Health and Well-being*. 2013;5(2):209-24.
- 44  
45 51. Maruf FA, Akinpelu AO, Salako BL, Akinyemi JO. Effects of aerobic dance training on blood  
46 pressure in individuals with uncontrolled hypertension on two antihypertensive drugs: a randomized  
47 clinical trial. *Journal of the american society of hypertension : JASH* [Internet]. 2016; 10(4):[336-45  
48 pp.].
- 49  
50 52. Mendis S, Johnston SC, Fan W, Oladapo O, Cameron A, Faramawi MF. Cardiovascular risk  
51 management and its impact on hypertension control in primary care in low-resource settings: a cluster-  
52 randomized trial. *Bulletin of the World Health Organization*. 2010;88(6):412-9.
- 53  
54  
55  
56  
57  
58  
59  
60

- 1
- 2
- 3
- 4 53. Ogedegbe G, Plange-Rhule J, Gyamfi J, Chaplin W, Ntim M, Apusiga K, et al. Health insurance
- 5 coverage with or without a nurse-led task shifting strategy for hypertension control: A pragmatic cluster
- 6 randomized trial in Ghana. *PLoS Med.* 2018;15(5):e1002561.
- 7
- 8 54. Ogedegbe G, Plange-Rhule J, Gyamfi J, Chaplin W, Ntim M, Apusiga K, et al. A cluster-
- 9 randomized trial of task shifting and blood pressure control in Ghana: study protocol. *Implement Sci.*
- 10 2014;9:73.
- 11
- 12 55. Okeahialam B, Ohihoin E, Ajuluchukwu J. Chronotherapy in Nigerian hypertensives.
- 13 *Therapeutic Advances in Cardiovascular Disease.* 2011;5(2):113-8.
- 14
- 15 56. Owolabi MO, Gebregziabher M, Akinyemi RO, Akinyemi JO, Akpa O, Olaniyan O, et al.
- 16 Randomized Trial of an Intervention to Improve Blood Pressure Control in Stroke Survivors. *Circulation*
- 17 *Cardiovascular Quality & Outcomes.* 2019;12(12):e005904.
- 18
- 19 57. Sarfo FS, Ovbiagele B. Stroke minimization through additive anti-atherosclerotic agents in
- 20 routine treatment (SMAART): a pilot trial concept for improving stroke outcomes in sub-Saharan
- 21 Africa. *Journal of the neurological sciences* [Internet]. 2017; 377:[167-73 pp.].
- 22
- 23 58. Sarfo FS, Treiber F, Gebregziabher M, Adamu S, Nichols M, Singh A, et al. Phone-based
- 24 intervention for blood pressure control among Ghanaian stroke survivors: A pilot randomized controlled
- 25 trial. *Int J Stroke.* 2019;14(6):630-8.
- 26
- 27 59. Sarfo FS, Treiber F, Jenkins C, Patel S, Gebregziabher M, Singh A, et al. Phone-based
- 28 Intervention under Nurse Guidance after Stroke (PINGS): study protocol for a randomized controlled
- 29 trial. *Trials.* 2016;17(1):436.
- 30
- 31 60. Saunders LD, Irwig LM, Gear JS, Ramushu DL. A randomized controlled trial of compliance
- 32 improving strategies in Soweto hypertensives. *Medical Care.* 1991;29(7):669-78.
- 33
- 34 61. Stewart A, Noakes T, Eales C, Shepard K, Becker P, Veriawa Y. Adherence to cardiovascular
- 35 risk factor modification in patients with hypertension. *Cardiovascular journal of South Africa* [Internet].
- 36 2005; 16(2):[102-7 pp.].
- 37
- 38 62. Steyn K, Lombard C, Gwebushe N, Fourie JM, Everett-Murphy K, Zwarenstein M, et al.
- 39 Implementation of national guidelines, incorporated within structured diabetes and hypertension records
- 40 at primary level care in Cape Town, South Africa: a randomised controlled trial. *Glob Health Action.*
- 41 2013;6:20796.
- 42
- 43 63. Turky K, Elnahas N, Oruch R. Effects of exercise training on postmenopausal hypertension:
- 44 Implications on nitric oxide levels. *Medical journal of Malaysia* [Internet]. 2013; 68(6):[459-64 pp.].
- 45
- 46 64. Vedanthan R, Kamano JH, DeLong AK, Naanyu V, Binanay CA, Bloomfield GS, et al.
- 47 Community Health Workers Improve Linkage to Hypertension Care in Western Kenya. *J Am Coll*
- 48 *Cardiol.* 2019;74(15):1897-906.
- 49
- 50 65. Vedanthan R, Kamano JH, Naanyu V, DeLong AK, Were MC, Finkelstein EA, et al. Optimizing
- 51 linkage and retention to hypertension care in rural Kenya (LARK hypertension study): study protocol
- 52 for a randomized controlled trial. *Trials.* 2014;15:143.
- 53
- 54
- 55
- 56
- 57
- 58
- 59
- 60



- 1  
2  
3  
4 66. Wahab KW, Owolabi M, Akinyemi R, Jenkins C, Arulogun O, Akpa O, et al. Short-term pilot  
5 feasibility study of a nurse-led intervention to improve blood pressure control after stroke in Nigeria.  
6 *Journal of the Neurological Sciences*. 2017;377:116-20.  
7  
8 67. Jagannathan R, Patel SA, Ali MK, Narayan KV. Global updates on cardiovascular disease  
9 mortality trends and attribution of traditional risk factors. *Current diabetes reports*. 2019;19(7):44.  
10  
11 68. Jeemon P, Gupta R, Onen C, Adler A, Gaziano TA, Prabhakaran D, et al. Management of  
12 hypertension and dyslipidemia for primary prevention of cardiovascular diseases. Prabhakaran D,  
13 Anand S, Gaziano TA, Mbanya J-C, Nugent R, editors: World Bank Publications; 2017. 444 p.  
14  
15 69. Noone C, Leahy J, Morrissey EC, Newell J, Newell M, Dwyer CP, et al. Comparative efficacy  
16 of exercise and anti-hypertensive pharmacological interventions in reducing blood pressure in people  
17 with hypertension: A network meta-analysis. *Eur J Prev Cardiol*. 2020;27(3):247-55.  
18  
19 70. Burnier M. Drug adherence in hypertension. *Pharmacological Research*. 2017;125:142-9.  
20  
21 71. GBD. Global, regional, and national age-sex-specific mortality for 282 causes of death in 195  
22 countries and territories, 1980-2017: a systematic analysis for the Global Burden of Disease Study 2017.  
23 *Lancet*. 2018;392(10159):1736-88.  
24  
25 72. Nielsen JØ, Shrestha AD, Neupane D, Kallestrup P. Non-adherence to anti-hypertensive  
26 medication in low-and middle-income countries: a systematic review and meta-analysis of 92443  
27 subjects. *Journal of human hypertension*. 2017;31(1):14-21.  
28  
29 73. Ajiboye RO, Okafor NA, Abiodun IO. Knowledge and Practice of Lifestyle Modification  
30 among Hypertensive Patients in a General Hospital Lagos. *Indian Journal of Community Health*.  
31 2015;27(1):143-9.  
32  
33 74. Tedla YG, Bautista LE. Drug Side Effect Symptoms and Adherence to Antihypertensive  
34 Medication. *American Journal of Hypertension*. 2016;29(6):772-9.  
35  
36 75. Goel MK. Non-Adherence to Anti-Hypertensive Treatment. *Indian Journal of Community  
37 Health*. 2020;32(1):126-9.  
38  
39 76. Xu T, Yu X, Ou S, Liu X, Yuan J, Tan X, et al. Adherence to Antihypertensive Medications and  
40 Stroke Risk: A Dose-Response Meta-Analysis. *J Am Heart Assoc*. 2017;6(7).  
41  
42 77. WHO. Noncommunicable diseases country profiles. Licence: CC BY-NC-SA 3.0 IGO. ed:  
43 Geneva: World Health Organization; 2018.  
44  
45 78. Nieuwlaat R, Wilczynski N, Navarro T, Hobson N, Jeffery R, Keenanasseril A, et al.  
46 Interventions for enhancing medication adherence. *Cochrane Database of Systematic Reviews*.  
47 2014(11):CD000011.  
48  
49 79. Ayodele OE, Alebiosu CO, Akinwusi PO, Akinsola A, Mejiuni A. Target organ damage and  
50 associated clinical conditions in newly diagnosed hypertensives attending a tertiary health facility. *Niger  
51 J Clin Pract*. 2007;10(4):319-25.  
52  
53 80. Seedat YK, Rayner BL, Veriava Y. South African hypertension practice guideline 2014.  
54 *Cardiovasc J Afr*. 2014;25(6):288-94.  
55  
56  
57  
58  
59  
60

- 1  
2  
3  
4 81. Borjesson M, Onerup A, Lundqvist S, Dahlof B. Physical activity and exercise lower blood  
5 pressure in individuals with hypertension: narrative review of 27 RCTs. *Br J Sports Med.*  
6 2016;50(6):356-61.  
7  
8 82. Cernota MD. Randomized controlled trials on prevention, diagnosis and treatment of  
9 hypertension in Africa, a systematic review, 2020.  
10  
11 83. Nations U. World Population Prospects: Available at  
12 <https://population.un.org/wpp/Download/Standard/Population/>: Department of Economic and Social  
13 Affairs, Population Division 2019 [accessed September 21 2020].  
14  
15 84. Gomez F, Hirbo J, Tishkoff SA. Genetic variation and adaptation in Africa: implications for  
16 human evolution and disease. *Cold Spring Harb Perspect Biol.* 2014;6(7):a008524.  
17  
18  
19  
20  
21  
22  
23  
24  
25  
26  
27  
28  
29  
30  
31  
32  
33  
34  
35  
36  
37  
38  
39  
40  
41  
42  
43  
44  
45  
46  
47  
48  
49  
50  
51  
52  
53  
54  
55  
56  
57  
58  
59  
60



**Table 1: Inclusion and exclusion criteria**

|                                                                                                                                                                                 |                                                                                                                                                                                     |
|---------------------------------------------------------------------------------------------------------------------------------------------------------------------------------|-------------------------------------------------------------------------------------------------------------------------------------------------------------------------------------|
| Design                                                                                                                                                                          | RCTs conducted in African countries, in international studies with at least 50 % African countries                                                                                  |
| Population                                                                                                                                                                      | African adult patients in secondary and tertiary prevention, diagnosis and treatment of hypertension<br>Exclusion of patients with gestational diabetes, Pre-eclampsia or eclampsia |
| Intervention                                                                                                                                                                    | All non-pharmacological strategies to improve adequate diagnoses, prevention and treatment of hypertension                                                                          |
| Control                                                                                                                                                                         | <ul style="list-style-type: none"> <li>- No intervention</li> <li>- Standard care</li> <li>- Another intervention</li> </ul>                                                        |
| Outcome                                                                                                                                                                         | blood pressure (SBP, DBP, MAP) and adherence to recommendations (medications and lifestyle changes) within longest follow-up                                                        |
| Publication                                                                                                                                                                     | Full-text publications according to CONSORT in English or German                                                                                                                    |
| CONSORT: Consolidated Standards of Reporting Trials; DBP: Diastolic blood pressure; MAP: Mean arterial pressure; SBP: Systolic blood pressure, RCT: Randomized controlled trial |                                                                                                                                                                                     |

Table 1: Study characteristics

|                                                       |                         | Participants |                          |                                                   | Intervention (IG) vs. Control (CG)                                                                                                                                                                                                                       |                       | Results on adherence and blood pressure                                                                                                                                                                                                                                                                                                                                                                                                                  |
|-------------------------------------------------------|-------------------------|--------------|--------------------------|---------------------------------------------------|----------------------------------------------------------------------------------------------------------------------------------------------------------------------------------------------------------------------------------------------------------|-----------------------|----------------------------------------------------------------------------------------------------------------------------------------------------------------------------------------------------------------------------------------------------------------------------------------------------------------------------------------------------------------------------------------------------------------------------------------------------------|
| Name (design)                                         | Country                 | n            | Age (years) /<br>Females | hypertension;<br>SBP /DBP<br>(mmHg)               | Description                                                                                                                                                                                                                                              | Follow-up<br>(months) | IG vs. CG; treatment effect (95 %-CI)                                                                                                                                                                                                                                                                                                                                                                                                                    |
| <b>Educational strategies for patients (11 RCTs)</b>  |                         |              |                          |                                                   |                                                                                                                                                                                                                                                          |                       |                                                                                                                                                                                                                                                                                                                                                                                                                                                          |
| Adeyemo 2013 (24)<br>RCT                              | Nigeria<br>(mixed)      | 668          | 62.7±10.0 /<br>66 %      | mild to<br>moderate<br>167.4±19.2 /<br>91.8 ±12.3 | home visits by nurses and clinic management<br>(community based, nurse-led treatment<br>program with physician backup; facilitation of<br>clinic visits and health education; use of<br>diuretics and a beta blocker as needed) vs.<br>clinic management | 6                     | <u>excellent adherence</u> (missed ≤2 pills per<br>month): worse in IG: 72.5% vs. 79.0%;<br>OR <sub>a</sub> 0.524 (0.30; 0.75)<br>BP control: no difference 65.0 vs. 66.3%;<br>RR 0.98 (0.87;1.11)                                                                                                                                                                                                                                                       |
| Ayodapo 2019 (27)<br>RCT                              | Nigeria<br>(mixed)      | 322          | 60.9±10.0 /<br>51 %      | MAP:<br>106.4±8.3                                 | Counselling on lifestyle behaviors (physical<br>activity, fruit and vegetable consumption,<br>alcohol consumption, smoking) over 30-45<br>minutes, reminders (telephone calls/SMS) vs.<br>usual care                                                     | 3                     | <u>Met recommendations on:</u><br>Physical activity: better in IG: 22.4 vs.<br>6.2 %; RR 3.60 (1.85;7.00)<br>fruit and vegetable consumption: better<br>in IG: 71.4 vs. 66 %; RR 1.74 (1.41;2.15)<br>alcohol consumption: better in IG: 100<br>vs. 87.6 %; RR 1.14 (1.08; 1.21)<br>smoking: no difference: 83.9 vs. 78.5 %;<br>RR 1.05 (0.95; 1.17)<br><u>blood pressure:</u><br>MAP: lower in IG: 94.6±8.1 vs.<br>106.2±7.6 mmHg; MD -9.8 (-11.5; -8.1) |
| Bobrow 2016 (28)<br>(PACTR2014<br>11000724141)<br>RCT | South Africa<br>(urban) | 1372         | 54.3±11.5 /<br>72 %      | mild to<br>moderate<br>135.4±17.5<br>83.4±12.1    | mobile phone text messages on behavior<br>change techniques (IG2: interactive with<br>information and possibility to response vs.<br>IG1: only information on hypertension,<br>motivation to take medications and<br>reminders) vs. usual care           | 12                    | <u>adherence</u> (days with medication<br>≥ 80 %): higher with IG: 59.7 vs. 62.8 vs.<br>49.4 %; RR 1.12 (1.01;1.23)<br>IG2 vs. CG: OR <sub>a</sub> 1.86 (1.39;2.49)<br>IG1 vs. CG: OR <sub>a</sub> 1.60 (1.20;2.16)<br><u>blood pressure:</u> slightly lower with IG1                                                                                                                                                                                    |

|                                                 |                  | Participants |                          |                                     | Intervention (IG) vs. Control (CG)                                                                                                                                             |                       | Results on adherence and blood pressure                                                                                                                                                                                                                                                                                                                                                                                                                                                                                                                               |
|-------------------------------------------------|------------------|--------------|--------------------------|-------------------------------------|--------------------------------------------------------------------------------------------------------------------------------------------------------------------------------|-----------------------|-----------------------------------------------------------------------------------------------------------------------------------------------------------------------------------------------------------------------------------------------------------------------------------------------------------------------------------------------------------------------------------------------------------------------------------------------------------------------------------------------------------------------------------------------------------------------|
| Name (design)                                   | Country          | n            | Age (years) /<br>Females | hypertension;<br>SBP /DBP<br>(mmHg) | Description                                                                                                                                                                    | Follow-up<br>(months) | IG vs. CG; treatment effect (95 %-CI)                                                                                                                                                                                                                                                                                                                                                                                                                                                                                                                                 |
|                                                 |                  |              |                          |                                     |                                                                                                                                                                                |                       | SBP: 132.7±17.5 vs. 132.1±16.6 vs. 134.3±17.3 mmHg<br>IG2 vs. CG: MD <sub>a</sub> -1.6 mmHg (-3.7; 0.6)<br>IG1 vs. CG: MD <sub>a</sub> -2.2mmHg (-4.4; -0.04)<br>BP control: slightly better with IG: 65 vs. 65 vs. 58 %<br>IG1 vs. CG: OR <sub>a</sub> 1.42 (1.03; 1.95)<br>IG2 vs. CG: OR <sub>a</sub> 1.41 (1.02; 1.95)                                                                                                                                                                                                                                            |
| Bolarinwa 2019 (29) (PACTR2016 06001671335) RCT | Nigeria (urban)  | 299          | 61.1±10.8 / 77 %         | 140.0 ± 22.9 / 86.9 ±11.9           | task-shifting (driven by trained and professionally competent nurses) home-based follow-up care (BP and BMI monitoring, medical advice and counselling at home) vs. usual care | 12                    | medical adherence: better with IG: low: 4 vs. 16.6%, medium: 17.5 vs. 34.7%, high: 78.5% vs. 48.7%<br>BP control: better with IG: 85.9% vs. 76.7%; RR 1.12 (1.00; 1.25)                                                                                                                                                                                                                                                                                                                                                                                               |
| Labhardt 2011 (36) cluster RCT                  | Cameroon (rural) | 187          | 59.9± 12.5/ 64 %         | mild to moderate 175.8 / 100.7      | reminder letters in case of missing follow-up (IG2) vs. financial incentive (one month free treatment for regular attenders) (IG1) vs. usual care in nurse-led facilities      | 12                    | adherence:<br>retention rate: 60 vs. 65 vs. 29%;<br>lower risk of loss to follow up from the program and better adherence in IG<br>IG2 vs. CG: HR <sub>a</sub> : 0.38 (0.24; 0.61)<br>IG1 vs. CG: HR <sub>a</sub> : 0.44 (0.27; 0.72)<br>adherence (≥ 80 %): 38 vs. 35 vs. 10 %<br>IG2 vs. CG: MD <sub>a</sub> : 28 % (14; 42)<br>IG1 vs. CG: MD <sub>a</sub> : 25 % (13; 37)<br>blood pressure:<br>no differences in SBP in retained patients<br>Costs:<br>In IG1: average monthly cost per patient for antihypertensive medication: 1.1±0.9 €, transport: 1.1±1.0 € |

|                                           |                      | Participants |                           |                                                                                                                                               | Intervention (IG) vs. Control (CG)                                                                                                                                                                                                                                                                                                                                                                                                          |                    | Results on adherence and blood pressure                                                                                                                                                                                                                                 |
|-------------------------------------------|----------------------|--------------|---------------------------|-----------------------------------------------------------------------------------------------------------------------------------------------|---------------------------------------------------------------------------------------------------------------------------------------------------------------------------------------------------------------------------------------------------------------------------------------------------------------------------------------------------------------------------------------------------------------------------------------------|--------------------|-------------------------------------------------------------------------------------------------------------------------------------------------------------------------------------------------------------------------------------------------------------------------|
| Name (design)                             | Country              | n            | Age (years) / Females     | hypertension; SBP /DBP (mmHg)                                                                                                                 | Description                                                                                                                                                                                                                                                                                                                                                                                                                                 | Follow-up (months) | IG vs. CG; treatment effect (95 %-CI)                                                                                                                                                                                                                                   |
| Owolabi 2019 (56) (NCT01900756) RCT       | Nigeria (mixed)      | 400#         | 57.2 ± 11.7 / 37 %        | All stroke (n=400); 138.3 ± 23.6 / 83.0 ± 15.2 stroke and uncontrolled hypertension (SBP/DBP>140 /90 mmHg) (n=168) 158.7 ± 21.7 / 92.5 ± 15.6 | chronic care model components of delivery system redesign (increased follow-up visits, pre-appointment phone texts), self-management support (patient report card, post-clinic follow-up phone texts, waiting room educational video) and clinical information systems (patient report card as part of medical chart, hospital registry) vs. standardized usual care (risk factor identification and control) and phone contact information | 12                 | <u>Blood pressure:</u><br>No difference for all patients after stroke:<br>SBP: 136.5±22.3 vs. 136.2±21.2 mmHg<br>patients with uncontrolled hypertension:<br>SBP: 145.1±22.6 vs. 148.5±22.8 mmHg                                                                        |
| Sarfo 2019 (58) (NCT02568137) cluster-RCT | Ghana (urban)        | 60#          | 55 ± 13 / 35 %            | stroke and uncontrolled hypertension; 143.8 ± 26.7 / 90.5 ± 15.7                                                                              | Nurse-led, multilevel approach with m-Health technology for monitoring and reporting BP measurement and tailored motivational text messages vs. usual care                                                                                                                                                                                                                                                                                  | 9                  | <u>adherence:</u><br>modified MMA score: no difference: 13±1.5 vs. 13±1.7<br><u>Blood pressure:</u><br>BP control: no difference: 47 vs. 40 %; OR <sub>a</sub> : 1.24 (0.83; 1.84)<br>SBP<140 mmHg: better in IG: 73 vs. 43 %<br>DBP<90 mmHg: better in CG: 47 vs. 77 % |
| Saunders 1991 (60) RCT                    | South Africa (urban) | 224          | 65 % between 40-50 / 73 % | mild to moderate; n.r. 116.6                                                                                                                  | Reminder letters and home visits by fieldworkers and patient-retained records for self-monitoring of medication compliance and BP control vs. usual care (appointment system and health education)                                                                                                                                                                                                                                          | 6                  | <u>adherence</u> (treatment received) over 6 months:<br>higher for newly treated (135.5±48.9 vs. 95.0±60.0 days) and infrequent attenders (168.4±16.4 vs.116.7±56.9 days) of 180 days<br>>80 % of treatment: better for newly treated (59 vs. 29 %; p< 0.001) and       |

|                                                        |                         | Participants |                              |                                                  | Intervention (IG) vs. Control (CG)                                                                                                                                                                    |                       | Results on adherence and blood pressure                                                                                                                                                                                                                                                                                                                                                                                                                                                                       |
|--------------------------------------------------------|-------------------------|--------------|------------------------------|--------------------------------------------------|-------------------------------------------------------------------------------------------------------------------------------------------------------------------------------------------------------|-----------------------|---------------------------------------------------------------------------------------------------------------------------------------------------------------------------------------------------------------------------------------------------------------------------------------------------------------------------------------------------------------------------------------------------------------------------------------------------------------------------------------------------------------|
| Name (design)                                          | Country                 | n            | Age (years) /<br>Females     | hypertension;<br>SBP /DBP<br>(mmHg)              | Description                                                                                                                                                                                           | Follow-up<br>(months) | IG vs. CG; treatment effect (95 %-CI)                                                                                                                                                                                                                                                                                                                                                                                                                                                                         |
|                                                        |                         |              |                              |                                                  |                                                                                                                                                                                                       |                       | infrequent attenders (87 vs. 42 %; p< 0.001)<br><u>blood pressure</u> :<br>DBP: lower for newly treated patients (93.4 vs. 100.5 mmHg; MD: 7.1 mmHg (0.5-13.7), no difference for infrequent attenders: 97.5 vs. 94.7 mmHg; MD: - 2.8 mmHg (-6.9; 1.3)                                                                                                                                                                                                                                                        |
| Stewart 2005(61)<br>RCT                                | South Africa<br>(urban) | 83           | late middle<br>aged/<br>n.r. | all<br>hypertensives;<br>146.4±18.5<br>93.5±11.1 | telephonic intervention (educational and home-based exercise program + support of a healthcare practitioner and a family member) vs. control group (educational and home-based exercise program only) | 6                     | <u>adherence</u> : better with IG: 62.8 ±34.5% vs. 39.3± 42.8 %; p=0.007<br><u>blood pressure</u> : no difference: SBP: 142±16 vs. 144±20 mmHg; MD: - 2 mmHg (-10.3 - 6.3)<br>DBP: 92±12 vs. 91±10 mmHg, change: MD: 1 mmHg (-4.0 - 6.0)                                                                                                                                                                                                                                                                      |
| Vedanthan 2019<br>(64)<br>(NCT01844596)<br>cluster-RCT | Kenya (rural)           | 1460         | 54.2±16.4/<br>58 %           | all<br>hypertensives;<br>159.4±19.5<br>89.7 ±12  | tailored behavioral communication (smartphone (IG2) or paper-based (IG1)) vs. usual care                                                                                                              | 12                    | <u>adherence</u> (Linkage to care): best results with IG2, worse with IG1:<br>IG2 vs. CG: OR <sub>a</sub> : 1.21 (0.70; 2.01)<br>IG1 vs. CG: OR <sub>a</sub> : 0.64 (0.43; 0.91)<br>IG2 vs. IG1: OR <sub>a</sub> : 1.95 (1.23; 3.01)<br><u>blood pressure</u> : no difference<br>SBP: 149.4±20.8 vs. 150.2±21.6 vs. 150.0±22.9 mmHg, change: -13.1±20.5 vs. -8.4±24.0 vs. - 9.7±25.1 mmHg<br>IG2 vs. CG: MD <sub>a</sub> : -2.13 mmHg (- 4.89;0.42)<br>IG1 vs. CG: MD <sub>a</sub> : -0.06 mmHg (-3.61; 3.20) |

|                                                                      |                      | Participants |                       |                                                             | Intervention (IG) vs. Control (CG)                                                                                                                                                                                               |                    | Results on adherence and blood pressure                                                                                                                                                                                                                                                                                                                           |
|----------------------------------------------------------------------|----------------------|--------------|-----------------------|-------------------------------------------------------------|----------------------------------------------------------------------------------------------------------------------------------------------------------------------------------------------------------------------------------|--------------------|-------------------------------------------------------------------------------------------------------------------------------------------------------------------------------------------------------------------------------------------------------------------------------------------------------------------------------------------------------------------|
| Name (design)                                                        | Country              | n            | Age (years) / Females | hypertension; SBP /DBP (mmHg)                               | Description                                                                                                                                                                                                                      | Follow-up (months) | IG vs. CG; treatment effect (95 %-CI)                                                                                                                                                                                                                                                                                                                             |
|                                                                      |                      |              |                       |                                                             |                                                                                                                                                                                                                                  |                    | IG2 vs. IG1: MD <sub>a</sub> : -2.07 mmHg (-5.14;1.12)<br>DBP: no difference: 91.3±12.7 vs. 91.0±14.1 vs. 90.1±13.7 mmHg, change: 1.5±12.7 vs. 0.4±15.2 vs. 0.1±14.7 mmHg<br>BP control: no difference:<br>IG2 vs. CG: OR <sub>a</sub> : 0.95 (0.61; 1.38)<br>IG1 vs. CG: OR <sub>a</sub> : 0.97 (0.63; 1.42)<br>IG2 vs. IG1: OR <sub>a</sub> : 1.00 (0.69; 1.40) |
| Wahab 2017 (66) RCT                                                  | Nigeria (urban)      | 35#          | 58.1 ±10.5/ 34 %      | all patients with stroke; 138.3 ± 24.2 85.0 ±12.4           | feasibility of a nurse-led Intervention (education and skill building, BP monitor with review, phone calls) vs. usual care                                                                                                       | 0.5                | <u>adherence</u> : no difference, but improvement in both groups: MMA Score: 7.32±0.93 vs. 7.03±1.36<br><u>Blood pressure</u> : no difference<br>SBP: 137.5±23.0 vs.133.1±18.2 mmHG; MD: 4.40 mmHg (-9.4; 18.2)<br>DBP: 84.1±9.7 vs. 84.2±13.1 mmHg; MD -0.1 mmHg (-7.7; 7.5)                                                                                     |
| <b>Educational strategies for health-care professionals (5 RCTs)</b> |                      |              |                       |                                                             |                                                                                                                                                                                                                                  |                    |                                                                                                                                                                                                                                                                                                                                                                   |
| Fairall 2016 (32) (ISRCTN20283604) cluster-RCT                       | South Africa (rural) | 4393         | 52 (IQR 43-62)/ 73 %  | mild to moderate 139±23.6 <sup>a</sup> 90±13.2 <sup>a</sup> | Education of nurses on NCD care (nurse training in educational outreach sessions with a primary care program to expand their role in NCD care, authorization to prescribe an expanded range of drugs on NCDs) vs. usual training | 14                 | <u>adherence</u> : no difference<br><u>Blood pressure</u> :<br>BP controlled: no difference: 33 vs. 32 %; RR 1.01 (0.2-1.8)                                                                                                                                                                                                                                       |
| Goudge 2018 (34) (ISRCTN12128227) cluster-RCT                        | South Africa (rural) | 4722         | 56.6±19.4 / 56 %      | hypertension: 46.6 %, of them: 53.4%,                       | Support of nurses by health workers (e.g. assistance with booking appointments, retrieve and fill patient files, health education,                                                                                               | 18                 | No hypertension: 50.9% vs. 52.9%<br><u>adherence and blood pressure: no difference</u>                                                                                                                                                                                                                                                                            |

|                                           |                 | Participants |                       |                                                                                              | Intervention (IG) vs. Control (CG)                                                                                                                      |                    | Results on adherence and blood pressure                                                                                                                                                                                                                                                                                                                 |
|-------------------------------------------|-----------------|--------------|-----------------------|----------------------------------------------------------------------------------------------|---------------------------------------------------------------------------------------------------------------------------------------------------------|--------------------|---------------------------------------------------------------------------------------------------------------------------------------------------------------------------------------------------------------------------------------------------------------------------------------------------------------------------------------------------------|
| Name (design)                             | Country         | n            | Age (years) / Females | hypertension; SBP / DBP (mmHg)                                                               | Description                                                                                                                                             | Follow-up (months) | IG vs. CG; treatment effect (95 %-CI)                                                                                                                                                                                                                                                                                                                   |
|                                           |                 |              |                       | on treatment and controlled: 8.6%, on treatment and uncontrolled: 9 %, not on treatment 29 % | measurements in the vital signs queue, prepacking of medications, reminders to appointment for patients) to provide chronic disease care vs. usual care |                    | on treatment and controlled: 11.3 vs. 11.2 %<br>on treatment and uncontrolled 13.0 vs. 13.2 %<br>not on treatment 24.9% vs. 22.7%<br>undiagnosed: 24.1 vs. 22.2 %<br>taking medication: 24.3 vs. 24.4 %                                                                                                                                                 |
| Gyamfi 2017(35) (NCT01802372) cluster-RCT | Ghana (mixed)   | 757          | 58.0±12.4 / 60 %      | mild to moderate 155.9 ± 12.1 / 89.6 ± 10.8                                                  | Training of nurses in task shifting for hypertension control + health insurance coverage vs. health coverage                                            | 12                 | <u>blood pressure</u> : improvement in both groups, but no difference between groups:<br>SBP: 137.1±27.5 vs. 138.4±27.3 mmHg; change: -19.5±18.0 vs. -16.6±17.9 mmHg; MD: -2.9 mmHg (-6.9; 1.0)<br>DBP: 79.8±22.9 vs.81.8±22.8 mmHg; change -9,3±11.5 vs. 8.7±18.7 mmHg; MD -0.6 mmHg (-2.9; 1.7)<br>BP control: 55.2 vs. 49.9 % (MD 5.2 % (-1.8; 12.4) |
| Mendis 2010 (52) cluster-RCT              | Nigeria (mixed) | 1188         | 55 ± 4.7 / 58 %       | mild to moderate 153.2±12.4 94 ± 9.7                                                         | Education of health-care workers and patients with a simple cardiovascular risk management package vs. usual care                                       | 12                 | <u>adherence</u> : higher with IG<br>Attended visits: 90.1 vs. 74.5 %<br>quit smoking: 100 vs. 74.4 % (p=0.023)<br>Increased fruit consumption: 93.4 vs. 18.8 % (p< 0.0001)<br>increased vegetable consumption: 14.2 vs. 7.0 % (p=0.0002)<br><u>blood pressure</u> : higher decrease in IG                                                              |

|                                                                                   |                                      | Participants |                       |                                                            | Intervention (IG) vs. Control (CG)                                                                                                                                                               |                    | Results on adherence and blood pressure                                                                                                                                                                          |
|-----------------------------------------------------------------------------------|--------------------------------------|--------------|-----------------------|------------------------------------------------------------|--------------------------------------------------------------------------------------------------------------------------------------------------------------------------------------------------|--------------------|------------------------------------------------------------------------------------------------------------------------------------------------------------------------------------------------------------------|
| Name (design)                                                                     | Country                              | n            | Age (years) / Females | hypertension; SBP /DBP (mmHg)                              | Description                                                                                                                                                                                      | Follow-up (months) | IG vs. CG; treatment effect (95 %-CI)                                                                                                                                                                            |
|                                                                                   |                                      |              |                       |                                                            |                                                                                                                                                                                                  |                    | SBP: -11.0±15.4 vs. -6.6±20.6 mmHg; MD -4.4 mmHg (-6.7; -2.1)<br>DBP: -5.4±10.0 vs. -2.0±13.2 mmHg; MD -3.4 mmHg (-4.9; -1.9)                                                                                    |
| Steyn 2013 (62) (PACTR2013 03000493351) cluster-RCT                               | South Africa (urban)                 | 920          | 60.3±11.1 / 79 %      | all hypertensives <sup>1</sup><br>51.2 ±26.7 / 87.1 ± 12.4 | multi-faced intervention to implement national guidelines (structured record of national guidelines and visits to train clinicians) vs. usual care (passive dissemination) at primary care level | 12                 | <u>Blood pressure</u> : no difference<br>SBP: 161±28.9 vs. 158.2±29.5 mmHg; MD 2.8 mmHg (-1.2; 6.8)<br>DBP: 88.1±13 vs. 87.1±12.6 mmHg; MD 1.00 mmHg (-0.73; 2.73)<br>controlled BP: 23.1 vs. 26 %               |
| <b>Individualized treatment (3 RCTs)</b>                                          |                                      |              |                       |                                                            |                                                                                                                                                                                                  |                    |                                                                                                                                                                                                                  |
| Akintunde 2017 (25) (ISRCTN69440037) RCT {Akintunde, 2017 #4980} (ISRCTN69440037) | Nigeria, Kenya, South Africa (urban) | 105          | 56.6±14.3 / 53 %      | uncontrolled<br>170.9 ± 19.2 / 85.6 ± 21.8                 | physiologically individualized care (guided by their physiological phenotype, based on plasma renin and aldosterone) vs. usual care                                                              | 12                 | <u>blood pressure</u> : lower in IG<br>SBP: 139.4±17.4 vs. 152.6±12.3 mmHg; MD -13.2 mmHg (-19.4; -7.0)<br>DBP: 84.0±11.0 vs. 89.6±7.0 mmHg; MD -5.6 mmHg (-9.4; -1.8)<br>BP control: 50.0 vs. 11.1 % (p=0.0001) |
| Okeahialam 2011 (55) RCT                                                          | Nigeria (urban)                      | 181          | 49.7±14.2 / 61 %      | mild to moderate<br>150.3 ± 14.8 / 93.7 ± 9.6              | chronotherapy: drug intake in the night (10 pm) vs. drug intake in the morning (10 am)                                                                                                           | 3                  | <u>blood pressure</u> : higher decrease in IG<br>SBP: . -18.1±17.9 vs.-14.1±14.7 mmHg; MD -4.0 mmHg (-9.0;1.0)<br>DBP-15.6±12.2 vs.-8.7±10.2 mmHg; MD -6.9 mmHg (-10.4; -3.4)                                    |
| <b>Physical activity (4 RCTs)</b>                                                 |                                      |              |                       |                                                            |                                                                                                                                                                                                  |                    |                                                                                                                                                                                                                  |



|                                      |                      | Participants |                               |                                                     | Intervention (IG) vs. Control (CG)                                                                                                                 |                    | Results on adherence and blood pressure                                                                                                                                                      |
|--------------------------------------|----------------------|--------------|-------------------------------|-----------------------------------------------------|----------------------------------------------------------------------------------------------------------------------------------------------------|--------------------|----------------------------------------------------------------------------------------------------------------------------------------------------------------------------------------------|
| Name (design)                        | Country              | n            | Age (years) / Females         | hypertension; SBP /DBP (mmHg)                       | Description                                                                                                                                        | Follow-up (months) | IG vs. CG; treatment effect (95 %-CI)                                                                                                                                                        |
| Aweto 2012 (26) RCT                  | Nigeria (urban)      | 50           | 45±12.3 / 58 %                | mild to moderate<br>138.7±10.9 / 79.9±9.3           | dance movement therapy (50 minutes) vs. educational sessions, both 2x/week over 4 wks                                                              | 1                  | <u>blood pressure</u> : lower in IG<br>SBP: 119.9±8.3 vs. 135.5±11.6 mmHg; MD -15.6 mmHg (-22.4; -8.8)<br>DBP: 70.9±7.2 vs. 74.1±7.7 mmHg; MD -3.2 mmHg (-8.1; 1.7)                          |
| Lamina 2010 (37) RCT                 | Nigeria (urban)      | 485          | 58.5 ±6.8 / 0 %               | mild to moderate, stable<br>165.4±13.2 / 98.1 ± 4.6 | training programs on bicycle ergometer, 3x/wk, 45-60 minutes: Interval training (IG2) vs. continuous training (IG1) vs. usual care over 8 wks      | 2                  | <u>blood pressure</u> : lower in IG<br>SBP: 150.4±16.7 vs. 154.4±12.6 vs.163.5±14.9 mmHg; MD -11.1 mmHg (-14.8; -7.4)<br>DBP: 95±5 vs. 94.4±8.8 vs. 96.1±2.7 mmHg; MD -1.4 mmHg (-2.6; -0.2) |
| Maruf 2016 (51) (ISRCTN81952488) RCT | Nigeria (urban)      | 120          | 52.8±8.4 (range 38-65) / 71 % | mild to moderate,<br>155.7±11.4 / 93±10             | aerobic dance training (3x/wk, 45 minutes) vs. usual care over 12 wks                                                                              | 3                  | <u>blood pressure</u> : lower in IG<br>SBP: 135.3±5.6 vs. 142.4±4.7 mmHg; MD: -7.1 mmHg (-9.3; -4.9)<br>DBP: 82.2±3.4 vs. 83.9±2.8 mmHg; MD: -1.7 mmHg (-3.0; -0.4)                          |
| Turky 2013 (63) RCT                  | Egypt (urban)        | 30           | 52.8±2.4, 40-50 / 100 %       | postmeno-pausal hypertensives<br>151±6.2 / 94.5±4.2 | moderate aerobic exercise training (40 minutes, 3x/wk) by walking on a treadmill vs. usual care over 8 wks                                         | 2                  | <u>blood pressure</u> : lower in IG<br>SBP: 124±5.6 vs. 145±6.7 mmHg; MD: -21.0 mmHg (-25.8; -16.2)<br>DBP: 85±5.4 vs. 95±3.7 mmHg; MD: -10.0 mmHg (-13.7; -6.3)                             |
| <b>Modified nutrition (1 RCT)</b>    |                      |              |                               |                                                     |                                                                                                                                                    |                    |                                                                                                                                                                                              |
| Charlton 2008 (31) RCT               | South Africa (urban) | 92           | 61.1±7/ 84 %                  | mild to moderate<br>134.6±15.7 / 81.1±8.1           | food-based dietary strategy (modified food, salt replacement, + 500 ml of maas (fermented milk) vs. control (same quantities of the targeted foods | 2                  | <u>blood pressure</u> : lower in IG<br>SBP: 132.5±15.8 vs. 127.5±15.8 mmHg; MD <sub>a</sub> :-6.2 mmHg (-11.4; -0.9)                                                                         |

1  
2  
3  
4  
5  
6  
7  
8  
9  
10  
11  
12  
13  
14  
15  
16  
17  
18  
19  
20  
21  
22  
23  
24  
25  
26  
27  
28  
29  
30  
31  
32  
33  
34  
35  
36  
37  
38  
39  
40  
41  
42  
43  
44  
45  
46

|                                                                                                                                                                                                                                                                                                                                                                                                                                                                               |         | Participants |                       |                               | Intervention (IG) vs. Control (CG)                                             |                    | Results on adherence and blood pressure                                   |
|-------------------------------------------------------------------------------------------------------------------------------------------------------------------------------------------------------------------------------------------------------------------------------------------------------------------------------------------------------------------------------------------------------------------------------------------------------------------------------|---------|--------------|-----------------------|-------------------------------|--------------------------------------------------------------------------------|--------------------|---------------------------------------------------------------------------|
| Name (design)                                                                                                                                                                                                                                                                                                                                                                                                                                                                 | Country | n            | Age (years) / Females | hypertension; SBP /DBP (mmHg) | Description                                                                    | Follow-up (months) | IG vs. CG; treatment effect (95 %-CI)                                     |
|                                                                                                                                                                                                                                                                                                                                                                                                                                                                               |         |              |                       |                               | of standard commercial composition, 500 ml/d artificially sweetened cooldrink) |                    | DBP: 82.2±9.5 vs. 79.2±11.4 mmHg; MD <sub>a</sub> : -0.6 mmHg (-3.0; 1.8) |
| # tertiary prevention<br>BMI: body mass index; BP: blood pressure; CG: Control group; DBP: diastolic blood pressure; IG: Intervention group; MD: mean difference; MD <sub>a</sub> : adjusted mean difference; n: number of randomized participants; MMA: Morisky medication adherence; NCD: non-communicable disease; n.r. not reported; ; OR <sub>a</sub> : adjusted odds ratio; RCT: randomized controlled trial; RR: relative risk; SBP: systolic blood pressure; wk: week |         |              |                       |                               |                                                                                |                    |                                                                           |

peer review only

Table 2: Risk of bias assessment

| Study                         | Sequence generation | Allocation concealment | Blinding of              |                   | Incomplete outcome data | Selective reporting | Other sources |
|-------------------------------|---------------------|------------------------|--------------------------|-------------------|-------------------------|---------------------|---------------|
|                               |                     |                        | personnel / participants | outcome assessors |                         |                     |               |
| <b>Educational strategies</b> |                     |                        |                          |                   |                         |                     |               |
| Adeyemo 2013 (24)             |                     |                        |                          |                   |                         |                     |               |
| Ayodapo 2019 (27)             |                     |                        |                          |                   |                         |                     |               |
| Bobrow 2016 (28)              |                     |                        |                          |                   |                         |                     |               |
| Bolarinwa 2019 (29)           |                     |                        |                          |                   |                         |                     |               |
| Fairall 2016 (32)             |                     |                        |                          |                   |                         |                     |               |
| Goudge 2018 (34)              |                     |                        |                          |                   |                         |                     |               |
| Gyamfi 2017 (35)              |                     |                        |                          |                   |                         |                     |               |
| Labhardt 2011 (36)            |                     |                        |                          |                   |                         |                     |               |
| Mendis 2010 (52)              |                     |                        |                          |                   |                         |                     |               |
| Owolabi 2019 (56)             |                     |                        |                          |                   |                         |                     |               |
| Sarfo 2019 (58)               |                     |                        |                          |                   |                         |                     |               |
| Saunders 1991 (60)            |                     |                        |                          |                   |                         |                     |               |
| Stewart 2005 (61)             |                     |                        |                          |                   |                         |                     |               |
| Steyn 2013 (62)               |                     |                        |                          |                   |                         |                     |               |
| Vedanthan 2019 (64)           |                     |                        |                          |                   |                         |                     |               |
| Wahab 2017 (66)               |                     |                        |                          |                   |                         |                     |               |
| <b>Standardized treatment</b> |                     |                        |                          |                   |                         |                     |               |
| Akintunde 2017 (25)           |                     |                        |                          |                   |                         |                     |               |

| Study                                 | Sequence generation | Allocation concealment | Blinding of              |                   | Incomplete outcome data | Selective reporting | Other sources |
|---------------------------------------|---------------------|------------------------|--------------------------|-------------------|-------------------------|---------------------|---------------|
|                                       |                     |                        | personnel / participants | outcome assessors |                         |                     |               |
| Okeahialam 2011 (55)                  |                     |                        |                          |                   |                         |                     |               |
| <b>Physical activity</b>              |                     |                        |                          |                   |                         |                     |               |
| Aweto 2012 (26)                       |                     |                        |                          |                   |                         |                     |               |
| Lamina 2010 (37)                      |                     |                        |                          |                   |                         |                     |               |
| Maruf 2016 (51)                       |                     |                        |                          |                   |                         |                     |               |
| Turky 2013 (63)                       |                     |                        |                          |                   |                         |                     |               |
| <b>Modified nutrition</b>             |                     |                        |                          |                   |                         |                     |               |
| Charlton 2008 (31)                    |                     |                        |                          |                   |                         |                     |               |
| : low; : unclear; : high risk of bias |                     |                        |                          |                   |                         |                     |               |

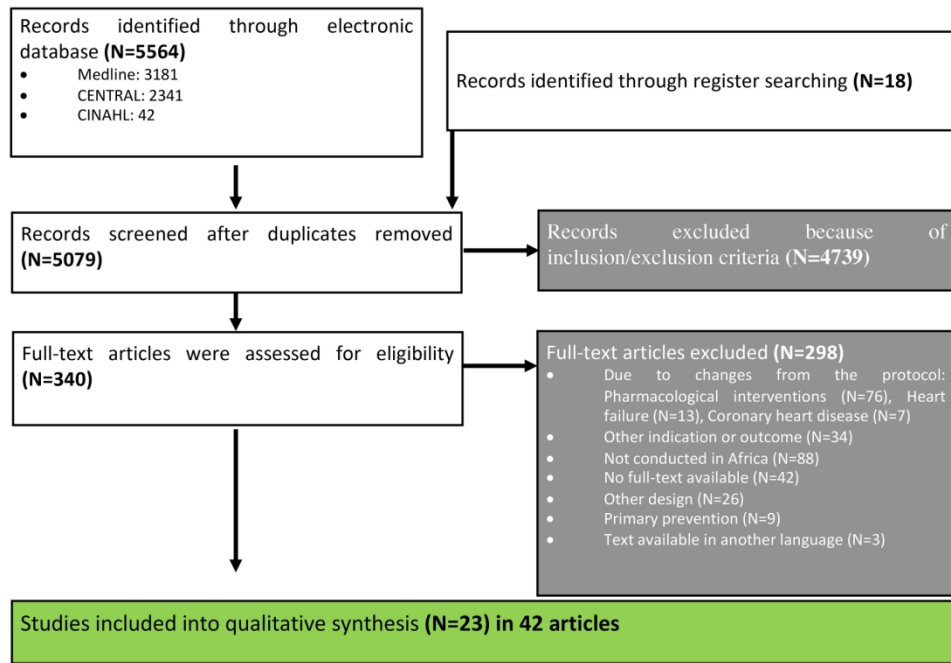

Figure 1: PRISMA flow chart describing the process of study selection

164x118mm (300 x 300 DPI)

1  
2  
3  
4  
5  
6  
7  
8  
9  
10  
11  
12  
13  
14  
15  
16  
17  
18  
19  
20  
21  
22  
23  
24  
25  
26  
27  
28  
29  
30  
31  
32  
33  
34  
35  
36  
37  
38  
39  
40  
41  
42  
43  
44  
45  
46  
47  
48  
49  
50  
51  
52  
53  
54  
55  
56  
57  
58  
59  
60

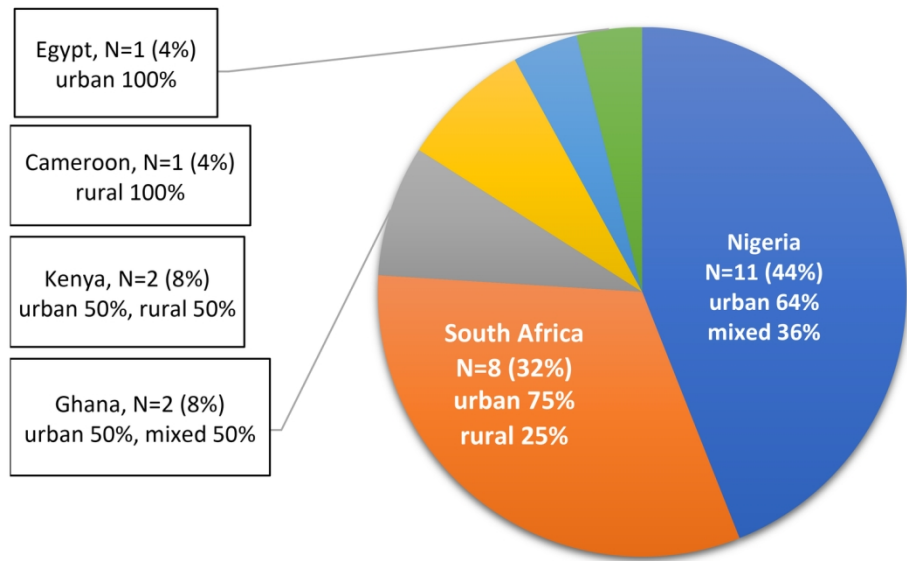

Figure 2: Spatial distribution of countries in which randomized studies were conducted

140x89mm (300 x 300 DPI)

**A: Results on systolic blood pressure (SBP)**

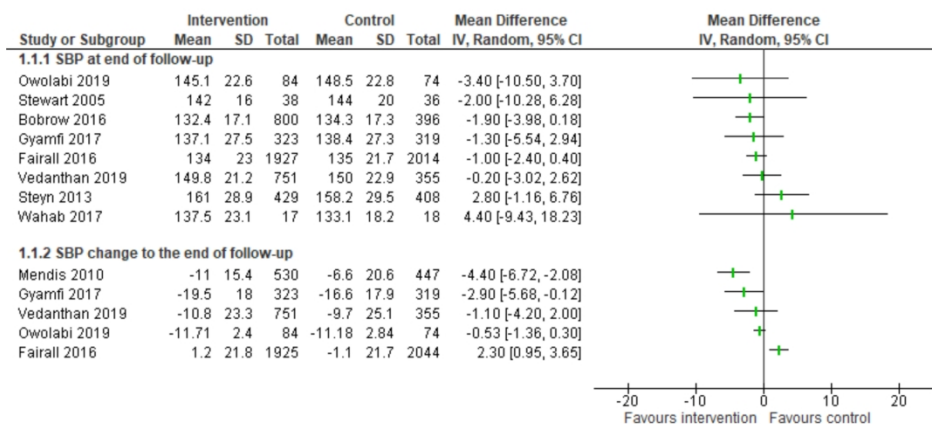

**B: Results on diastolic blood pressure (DBP)**

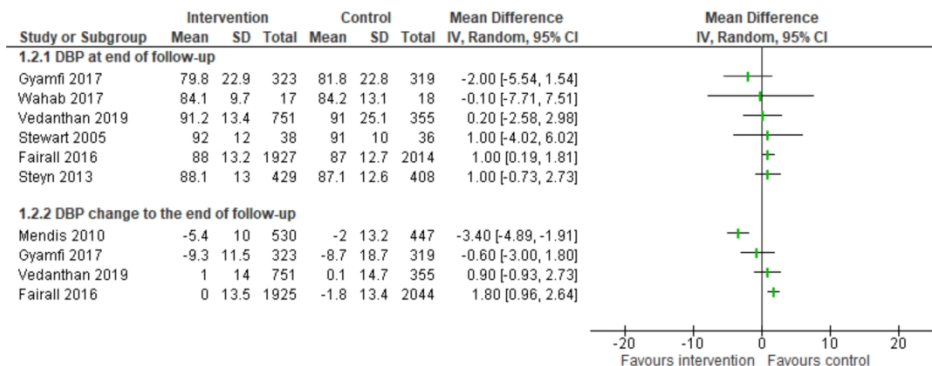

**C: Results on Blood pressure (BP) control**

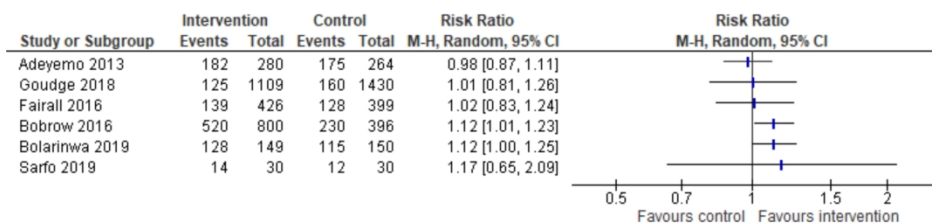

Figure 3: Results of educational strategies to improve adherence

160x204mm (300 x 300 DPI)

**A: Results on systolic blood pressure (SBP)**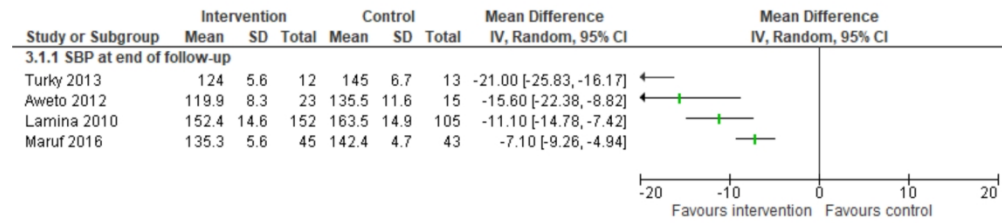**B: Results on diastolic blood pressure (DBP)**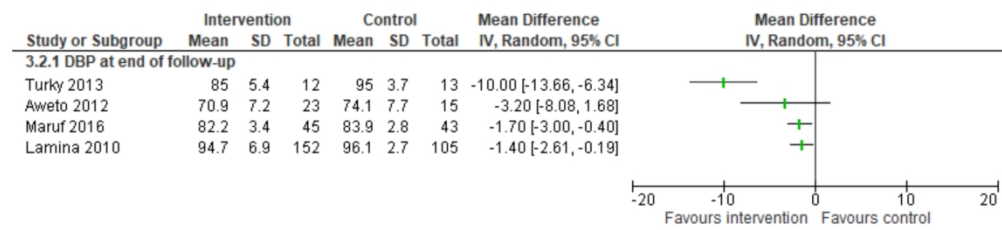

Figure 4: Results of strategies to enhance physical activity

160x96mm (300 x 300 DPI)



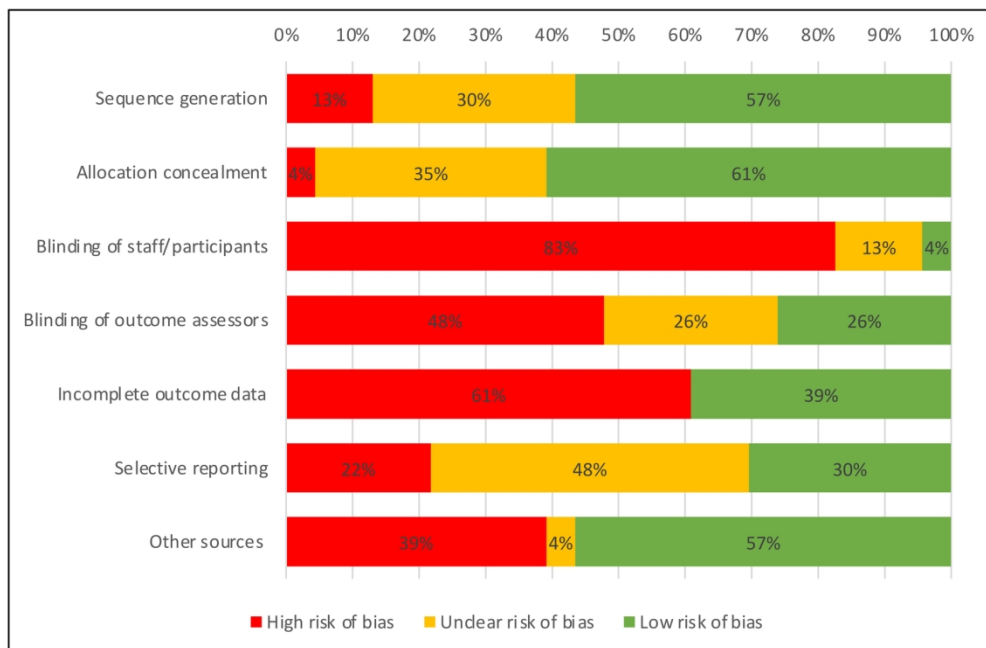

Figure 5: Summary of risk of bias

158x104mm (300 x 300 DPI)

## Search strategies

### Medline (Ovid): Search on CVDs

| Nr.               | Searches (24th July 2017)                  | Results |
|-------------------|--------------------------------------------|---------|
| <b>Indication</b> |                                            |         |
| 1.                | exp heart diseases/                        |         |
| 2.                | exp vascular diseases/                     |         |
| 3.                | cerebrovascular disorders/                 |         |
| 4.                | exp brain ischemia/                        |         |
| 5.                | exp carotid artery diseases/               |         |
| 6.                | exp dementia, vascular/                    |         |
| 7.                | exp intracranial arterial diseases/        |         |
| 8.                | exp intracranial embolism/ and thrombosis/ |         |
| 9.                | exp intracranial hemorrhages/              |         |
| 10.               | exp stroke/                                |         |
| 11.               | exp hyperlipidemias/                       |         |
| 12.               | Exp hypercholesteremia/                    |         |
| 13.               | exp Myocardial Ischemia/                   |         |
| 14.               | angina.tw                                  |         |
| 15.               | (heart adj3 disease\$.tw.                  |         |
| 16.               | (coronary adj3 disease\$.tw.               |         |
| 17.               | (peripheral adj3 disease\$.tw.             |         |
| 18.               | (cerebrovascular disease).tw               |         |
| 19.               | Renal artery stenosis.tw                   |         |
| 20.               | (Aortic aneurism or Aneurysm\$.tw          |         |
| 21.               | myocardial infarct\$.tw.                   |         |
| 22.               | exp Myocardial Revascularization/          |         |
| 23.               | (coronary adj3 bypass\$.tw.                |         |
| 24.               | (coronary adj3 angioplast\$.tw.            |         |
| 25.               | (heart adj3 infarct\$.tw.                  |         |
| 26.               | postmyocardial infarct\$.tw.               |         |
| 27.               | cardiovascular diseases/                   |         |
| 28.               | Hypertens\$.tw                             |         |
| 29.               | (high adj2 blood pressure).tw              |         |
| 30.               | (blood pressure control).tw                |         |
| 31.               | Hypertensive heart disease.tw.             |         |
| 32.               | Cardiomyopath\$.tw.                        |         |
| 33.               | Heart failure.tw.                          |         |

| Nr.                                 | Searches (24th July 2017)                                           | Results   |
|-------------------------------------|---------------------------------------------------------------------|-----------|
| 34.                                 | (Pulmonary heart disease).tw                                        |           |
| 35.                                 | Cardiac dysrhythmia*.tw.                                            |           |
| 36.                                 | Inflammatory heart disease.tw.                                      |           |
| 37.                                 | Endocarditis.tw.                                                    |           |
| 38.                                 | Cardiomegaly.tw                                                     |           |
| 39.                                 | Valvular heart disease.tw.                                          |           |
| 40.                                 | Rheumatic heart disease.tw                                          |           |
| 41.                                 | Myocarditis.tw                                                      |           |
| 42.                                 | Arrhythmi\$.tw                                                      |           |
| 43.                                 | Vasculitis.tw                                                       |           |
| 44.                                 | or/1-43                                                             | 2 498 192 |
| <b>Africa and African countries</b> |                                                                     |           |
| 45.                                 | Africa.tw                                                           |           |
| 46.                                 | Exp Africa/                                                         |           |
| 47.                                 | Algeria\$.tw or exp Algeria/                                        |           |
| 48.                                 | Angol\$.tw or exp Angola/                                           |           |
| 49.                                 | Benin\$.tw or exp Benin/                                            |           |
| 50.                                 | Botswan\$.tw or exp Botswana/                                       |           |
| 51.                                 | Burkina Faso.tw or exp Burkina Faso/                                |           |
| 52.                                 | Burund\$.tw or exp Burundi/                                         |           |
| 53.                                 | Cameroon\$.tw or exp Cameroon/                                      |           |
| 54.                                 | Cape Verde.tw or exp Cape Verde/                                    |           |
| 55.                                 | Central African Republic\$.tw or exp Central African Republic/      |           |
| 56.                                 | Chad\$.tw or exp Chad/                                              |           |
| 57.                                 | Comoros\$.tw or exp Comoros/                                        |           |
| 58.                                 | Cote d'Ivoire.tw or exp Cote d'Ivoire/                              |           |
| 59.                                 | Democratic Republic of Congo.tw or exp Democratic Republic of Congo |           |
| 60.                                 | Djibout\$.tw or exp Djibouti/                                       |           |
| 61.                                 | Egypt\$.tw or exp Egypt/                                            |           |
| 62.                                 | Equatorial Guinea\$.tw or exp Equatorial Guinea/                    |           |
| 63.                                 | Eritrea\$.tw or exp Eritrea/                                        |           |
| 64.                                 | Ethiop\$.tw or exp Ethiopia/                                        |           |
| 65.                                 | Gabon\$.tw or exp Gabon/                                            |           |
| 66.                                 | Gambia\$.tw or exp Gambia/                                          |           |
| 67.                                 | Ghana\$.tw or exp Ghana/                                            |           |
| 68.                                 | Guinea\$.tw or exp Guinea/                                          |           |
| 69.                                 | Guinea-Bissau.tw or exp Guinea-Bissau/                              |           |

| Nr.                 | Searches (24th July 2017)                | Results |
|---------------------|------------------------------------------|---------|
| 70.                 | Kenya\$.tw or exp Kenya/                 |         |
| 71.                 | Lesoth\$.tw or exp Lesotho/              |         |
| 72.                 | Liberia\$.tw or exp Liberia/             |         |
| 73.                 | Libya\$.tw or exp Libya/                 |         |
| 74.                 | Madagascar\$.tw or exp Madagascar/       |         |
| 75.                 | Malawi\$.tw or exp Malawi/               |         |
| 76.                 | Mali.tw or exp Mali/                     |         |
| 77.                 | Mauritania\$.tw or exp Mauritania/       |         |
| 78.                 | Mauritius\$.tw or exp Mauritius/         |         |
| 79.                 | Morocc\$.tw or exp Morocco/              |         |
| 80.                 | Mozambique\$.tw or exp Mozambique/       |         |
| 81.                 | Namibia\$.tw or exp Namibia/             |         |
| 82.                 | Niger.tw or exp Niger/                   |         |
| 83.                 | Nigeria\$.tw or exp Nigeria/             |         |
| 84.                 | Rwanda\$.tw or exp Rwanda/               |         |
| 85.                 | (Sao Tome and Principe).tw               |         |
| 86.                 | Senegal\$.tw or exp Senegal/             |         |
| 87.                 | Seychell\$.tw                            |         |
| 88.                 | Sierra Leone.tw or exp Sierra Leone/     |         |
| 89.                 | Somalia\$.tw or exp Somalia/             |         |
| 90.                 | South Africa\$.tw or exp South Africa.de |         |
| 91.                 | South Sudan.tw or exp South Sudan/       |         |
| 92.                 | Sudan\$.tw or exp Sudan/                 |         |
| 93.                 | Swaziland\$.tw or exp Swaziland/         |         |
| 94.                 | Tanzania\$.tw or exp Tanzania/           |         |
| 95.                 | Togo\$.tw or exp Togo/                   |         |
| 96.                 | Tunisia\$.tw or exp Tunisia/             |         |
| 97.                 | Uganda\$.tw or exp Uganda/               |         |
| 98.                 | Zambia\$.tw or exp Zambia/               |         |
| 99.                 | Zimbabwe\$.tw or exp Zimbabwe/           |         |
| 100.                | Somaliland\$.tw or exp Somaliland/       |         |
| 101.                | #1.tw                                    |         |
| 102.                | or/45-101                                | 436 084 |
| 103.                | 44 and 102                               | 19 017  |
| <b>Study design</b> |                                          |         |
| 104.                | randomized controlled trial.pt.          |         |
| 105.                | controlled clinical trial.pt.            |         |

| Nr.  | Searches (24th July 2017)   | Results     |
|------|-----------------------------|-------------|
| 106. | randomized.ab.              |             |
| 107. | placebo.ab.                 |             |
| 108. | randomly.ab.                |             |
| 109. | trial.ab.                   |             |
| 110. | groups.ab.                  |             |
| 111. | or/104-110                  | 2 535 560   |
| 112. | exp animals/ not humans.sh. |             |
| 113. | 111 not 112                 | 2 133 129   |
| 114. | 103 and 113                 | <b>2643</b> |

### Medline (Ovid): Update on hypertension

| Nr.                                 | Searches (23th June 2020)                                           | Results |
|-------------------------------------|---------------------------------------------------------------------|---------|
| <b>Indication</b>                   |                                                                     |         |
| 1.                                  | Exp hypertension                                                    |         |
| 2.                                  | Hypertens\$.ti,ab                                                   |         |
| 3.                                  | (high adj2 blood pressure).ti,ab                                    |         |
| 4.                                  | (blood pressure control).ti,ab                                      |         |
| 5.                                  | or/1-4                                                              | 464 555 |
| <b>Africa and African countries</b> |                                                                     |         |
| 6.                                  | Africa.tw                                                           |         |
| 7.                                  | Exp Africa/                                                         |         |
| 8.                                  | Algeria\$.tw or exp Algeria/                                        |         |
| 9.                                  | Angol\$.tw or exp Angola/                                           |         |
| 10.                                 | Benin\$.tw or exp Benin/                                            |         |
| 11.                                 | Botswan\$.tw or exp Botswana/                                       |         |
| 12.                                 | Burkina Faso.tw or exp Burkina Faso/                                |         |
| 13.                                 | Burund\$.tw or exp Burundi/                                         |         |
| 14.                                 | Cameroon\$.tw or exp Cameroon/                                      |         |
| 15.                                 | Cape Verde.tw or exp Cape Verde/                                    |         |
| 16.                                 | Central African Republic\$.tw or exp Central African Republic/      |         |
| 17.                                 | Chad\$.tw or exp Chad/                                              |         |
| 18.                                 | Comoros\$.tw or exp Comoros/                                        |         |
| 19.                                 | Cote d'Ivoire.tw or exp Cote d'Ivoire/                              |         |
| 20.                                 | Democratic Republic of Congo.tw or exp Democratic Republic of Congo |         |
| 21.                                 | Djibout\$.tw or exp Djibouti/                                       |         |

| Nr. | Searches (23th June 2020)                        | Results |
|-----|--------------------------------------------------|---------|
| 22. | Egypt\$.tw or exp Egypt/                         |         |
| 23. | Equatorial Guinea\$.tw or exp Equatorial Guinea/ |         |
| 24. | Eritrea\$.tw or exp Eritrea/                     |         |
| 25. | Ethiop\$.tw or exp Ethiopia/                     |         |
| 26. | Gabon\$.tw or exp Gabon/                         |         |
| 27. | Gambia\$.tw or exp Gambia/                       |         |
| 28. | Ghana\$.tw or exp Ghana/                         |         |
| 29. | Guinea\$.tw or exp Guinea/                       |         |
| 30. | Guinea-Bissau.tw or exp Guinea-Bissau/           |         |
| 31. | Kenya\$.tw or exp Kenya/                         |         |
| 32. | Lesoth\$.tw or exp Lesotho/                      |         |
| 33. | Liberia\$.tw or exp Liberia/                     |         |
| 34. | Libya\$.tw or exp Libya/                         |         |
| 35. | Madagascar\$.tw or exp Madagascar/               |         |
| 36. | Malawi\$.tw or exp Malawi/                       |         |
| 37. | Mali.tw or exp Mali/                             |         |
| 38. | Mauritania\$.tw or exp Mauritania/               |         |
| 39. | Mauritius\$.tw or exp Mauritius/                 |         |
| 40. | Morocc\$.tw or exp Morocco/                      |         |
| 41. | Mozambique\$.tw or exp Mozambique/               |         |
| 42. | Namibia\$.tw or exp Namibia/                     |         |
| 43. | Niger.tw or exp Niger/                           |         |
| 44. | Nigeria\$.tw or exp Nigeria/                     |         |
| 45. | Rwanda\$.tw or exp Rwanda/                       |         |
| 46. | (Sao Tome and Principe).tw                       |         |
| 47. | Senegal\$.tw or exp Senegal/                     |         |
| 48. | Seychell\$.tw                                    |         |
| 49. | Sierra Leone.tw or exp Sierra Leone/             |         |
| 50. | Somalia\$.tw or exp Somalia/                     |         |
| 51. | South Africa\$.tw or exp South Africa.de         |         |
| 52. | South Sudan.tw or exp South Sudan/               |         |
| 53. | Sudan\$.tw or exp Sudan/                         |         |
| 54. | Swaziland\$.tw or exp Swaziland/                 |         |
| 55. | Tanzania\$.tw or exp Tanzania/                   |         |
| 56. | Togo\$.tw or exp Togo/                           |         |
| 57. | Tunisia\$.tw or exp Tunisia/                     |         |
| 58. | Uganda\$.tw or exp Uganda/                       |         |

| Nr.                 | Searches (23th June 2020)                    | Results    |
|---------------------|----------------------------------------------|------------|
| 59.                 | Zambia\$.tw or exp Zambia/                   |            |
| 60.                 | Zimbabwe\$.tw or exp Zimbabwe/               |            |
| 61.                 | Somaliland\$.tw or exp Somaliland/           |            |
| 62.                 | Sahrawi Arab Democratic Republic.tw.         |            |
| 63.                 | or/6-62                                      | 530 370    |
| <b>Study design</b> |                                              |            |
| 64.                 | randomized controlled trial.pt.              |            |
| 65.                 | controlled clinical trial.pt.                |            |
| 66.                 | (randomized or randomised or randomly).ti,ab |            |
| 67.                 | placebo.ab.                                  |            |
| 68.                 | trial.ab.                                    |            |
| 69.                 | groups.ab.                                   |            |
| 70.                 | or/64-69                                     | 2 757 989  |
| 71.                 | 5 and 63 and 70                              | 3036       |
| 72.                 | exp animals/ not humans.sh.                  |            |
| 73.                 | 71 not 72                                    |            |
| 74.                 | 73 not (comment or editorial).pt             | 2964       |
| 75.                 | Limit 74 to yr= "2017-Current"               | <b>538</b> |

**CENTRAL: Search on CVDs**

| Nr. | Searches (14th August 2017)                                                                                                | Results |
|-----|----------------------------------------------------------------------------------------------------------------------------|---------|
| 1   | Africa, explode all trees                                                                                                  |         |
| 2   | Algeria* or Angol* or Benin* or Botswan*                                                                                   |         |
| 3   | (Burkina Faso) or Burund* or Cameroon* or (Cape Verde) or (Central African Republic)                                       |         |
| 4   | Chad* or Comoros* or Cote d'Ivoire or Congo*                                                                               |         |
| 5   | Djibout* or Egypt* or (Equatorial Guinea*) or Eritrea*                                                                     |         |
| 6   | Ethiop* or Gabon* or Gambia* or Ghana* or Guinea* or Guinea-Bissau                                                         |         |
| 7   | Kenya* or Lesoth* or Liberia* or Libya* or Madagascar* or Malawi*                                                          |         |
| 8   | Mali* or Mauritania* or Mauritius* or Morocc* or Mozambique* or Namibia* or Niger*                                         |         |
| 9   | Nigeria* or Rwanda* or (Sao Tome and Principe) or Senegal* or Seychell*                                                    |         |
| 10  | Sierra Leone or Somalia* or (South Africa) or (South Sudan*) or Sudan* or Swasiland                                        |         |
| 11  | Tanzania* or Togo* or Tunisia* or Uganda* or Zambia* or Zimbabwe* or Somaliland or (Sahrawi Arab Democratic Republic)      |         |
| 12  | #1 or #2 or #3 or #4 or #5 or #6 or #7 or #8 or #9 or #10 or #11                                                           | 39 610  |
| 13  | MeSH descriptor Cardiovascular Diseases, this term only                                                                    |         |
| 14  | MeSH descriptor Heart Diseases explode all trees                                                                           |         |
| 15  | MeSH descriptor Vascular Diseases explode all trees                                                                        |         |
| 16  | MeSH descriptor Cerebrovascular Disorders, this term only                                                                  |         |
| 17  | MeSH descriptor Brain Ischemia explode all trees                                                                           |         |
| 18  | MeSH descriptor Carotid Artery Diseases explode all trees                                                                  |         |
| 19  | MeSH descriptor Dementia, Vascular explode all trees                                                                       |         |
| 20  | MeSH descriptor Intracranial Arterial Diseases explode all trees                                                           |         |
| 21  | MeSH descriptor Intracranial Embolism and Thrombosis explode all trees                                                     |         |
| 22  | MeSH descriptor Intracranial Hemorrhages explode all trees                                                                 |         |
| 23  | MeSH descriptor Stroke explode all trees                                                                                   |         |
| 24  | MeSH descriptor Hyperlipidemias explode all trees (4197)                                                                   |         |
| 25  | (coronar* or heart or peripheral* or cerebrovascular* or myocardial) near 3 (disease or infarct*)                          |         |
| 26  | myocardi* near 3 (infarct* or revascular* or ischaem* or ischem*)                                                          |         |
| 27  | vascular* near 3 (peripheral* or disease* or complication*)                                                                |         |
| 28  | hypertensi* or (high near 2 blood pressure)                                                                                |         |
| 29  | (heart near 2 failure) or stroke                                                                                           |         |
| 30  | Endocarditis or myocarditis or Cardiomegaly or arrythmi*                                                                   |         |
| 31  | #13 or #14 or #15 or #16 or #17 or #18 or #19 or #20 or #21 or #22 or #23 or #24 or #25 or #26 or #27 or #28 or #29 or #30 | 101 472 |
| 32  | #12 and #31                                                                                                                | 4139    |
| 32  | Trials                                                                                                                     | 2008    |

**CENTRAL, Update on hypertension**

| Nr. | Searches (23th June 2020)                                                            | Results |
|-----|--------------------------------------------------------------------------------------|---------|
| 1   | Africa, explode all trees                                                            |         |
| 2   | Algeria* or Angol* or Benin* or Botswan*                                             |         |
| 3   | (Burkina Faso) or Burund* or Cameroon* or (Cape Verde) or (Central African Republic) |         |
| 4   | Chad* or Comoros* or Cote d'Ivoire or Congo*                                         |         |
| 5   | Djibout* or Egypt* or (Equatorial Guinea*) or Eritrea*                               |         |
| 6   | Ethiop* or Gabon* or Gambia* or Ghana* or Guinea* or Guinea-Bissau                   |         |
| 7   | Kenya* or Lesoth* or Liberia* or Libya* or Madagascar* or Malawi*                    |         |
| 8   | Mali* or Mauritania* or Mauritius* or Morocc* or Mozambique* or Namibia* or Niger*   |         |
| 9   | Nigeria* or Rwanda* or (Sao Tome and Principe) or Senegal* or Seychell*              |         |



| Nr. | Searches (23th June 2020)                                                                                             | Results    |
|-----|-----------------------------------------------------------------------------------------------------------------------|------------|
| 10  | Sierra Leone or Somalia* or (South Africa) or (South Sudan*) or Sudan* or Swasiland                                   |            |
| 11  | Tanzania* or Togo* or Tunisia* or Uganda* or Zambia* or Zimbabwe* or Somaliland or (Sahrawi Arab Democratic Republic) |            |
| 12  | #1 or #2 or #3 or #4 or #5 or #6 or #7 or #8 or #9 or #10 or #11                                                      | 60 623     |
| 13  | MeSH descriptor: [Hypertension] explode all trees                                                                     |            |
| 14  | hypertensi* or (high near 2 blood pressure)                                                                           |            |
| 15  | #13 or #14                                                                                                            | 67 954     |
| 16  | #12 and #15                                                                                                           | 2929       |
|     | Trials, 2017-Current                                                                                                  | <b>333</b> |

### CINAHL, Search on 23.06.2020

(Africa\$ or Africa\$ or Algeria\$ or Angol\$ or Benin\$ or Botswan\$ or (Burkina Faso) or Burund\$ or Cameroon\$ or (Cape Verde) or (Central African Republic) or Chad\$ or Comoros\$ or Cote d'Ivoire or Congo\$ Djibout\$ or Egypt\$ or (Equatorial Guinea\$) or Eritrea\$ or Ethiop\$ or Gabon\$ or Gambia\$ or Ghana\$ or Guinea\$ or Guinea-Bissau or Kenya\$ or Lesoth\$ or Liberia\$ or Libya\$ or Madagascar\$ or Malawi\$ or Mali\$ or Mauritania\$ or Mauritius\$ or Morocc\$ or Mozambique\$ or Namibia\$ or Niger\$ or Nigeria\$ or Rwanda\$ or (Sao Tome and Principe) or Senegal\$ or Seychell\$ or Sierra Leone or Somalia\$ or (South Africa) or (South Sudan\$) or Sudan\$ or Swasiland or Tanzania\$ or Togo\$ or Tunisia\$ or Uganda\$ or Zambia\$ or Zimbabwe\$ or Somaliland or (Sahrawi Arab Democratic Republic)) in Abstract

AND

hypertension or high blood pressure or elevated blood pressure or htn or hypertensive in Abstract

AND

randomized or rct or randomised in Abstract

AND

In English

AND

Peer-reviewed

And

Humans

**Total: 42 results**

### International Clinical Trials Registry Platform (<http://apps.who.int/trialsearch/AdvSearch.aspx>), Search on 22 October 2019

**hypertension or (blood pressure control) or (high blood pressure) in the condition,**

**Recruitment status: all**

**Countries of recruitment:**

- Africa or African in the title: 90 trials
- Algeria or Angola or Behin or Burkina Faso or Botswana or Burundi or Cameroon or Central Africa Republic or Chad or Congo or Cabo Verde or Cite D'Ivoire: 13 trials
- Democratic Republic of Congo or Djibouti or Egypt or Equatorial Guinea or Eritrea or Ethiopia or Gabon or Gambia or Ghana or Guinea or Guinea-Bissau or Kenya: 78 trials
- Lesotho or Liberia or Libya or Madagascar or Malawi or Mali or Mauritius or Morocco or Mozambique: 14 trials
- Namibia or Niger or Nigeria or Rwanda or Sao Tome and Principe or Senegal or Seychelles or Sierra Leone or Somalia or Sudan or South Sudan or Swaziland: 23 trials
- Togo or Tunezia or United Republic of Tanzania or Uganda or Zambia or Zimbabwe: 25 trials

**Total: 18 results**

**Adeyemo 2013**

Adeyemo A, Tayo BO, Luke A, Ogedegbe O, Durazo-Arvizu R, Cooper RS. The Nigerian antihypertensive adherence trial: a community-based randomized trial. *Journal of Hypertension*. 2013.

DOI: <https://doi.org/10.1007/s11892-019-1161-2>

**Akintunde 2018**

Akintunde A, Nondi J, Gogo K, Jones ESW, Rayner BL, Hackam DG, et al. Physiological Phenotyping for Personalized Therapy of Uncontrolled Hypertension in Africa. *Am J Hypertens*. 2017.

DOI: <https://doi.org/10.1093/ajh/hpx066>

**Aweto 2012**

Aweto HA, Owwoye OB, Akinbo SR, Onabajo AA. Effects of dance movement therapy on selected cardiovascular parameters and estimated maximum oxygen consumption in hypertensive patients. *Nigerian Quarterly Journal of Hospital Medicine*. 2012.

PMID: <https://europepmc.org/article/med/23175912>

**Ayodapo 2019**

Ayodapo AO, Olukokun TAV. Lifestyle counselling and behavioural change: role among adult hypertensives in a rural tertiary institution. *South African Family Practice*. 2019.

DOI: <https://doi.org/10.1080/20786190.2019.1569453>

**Bobrow 2016**

Bobrow K, Farmer AJ, Springer D, Shanyinde M, Yu LM, Brennan T, et al. Mobile Phone Text Messages to Support Treatment Adherence in Adults With High Blood Pressure (SMS-Text Adherence Support [StAR]): A Single-Blind, Randomized Trial. *Circulation*. 2016.

DOI: <https://doi.org/10.1161/CIRCULATIONAHA.115.017530>

Leon N, Surrender R, Bobrow K, Muller J, Farmer A. Improving treatment adherence for blood pressure lowering via mobile phone SMS-messages in South Africa: a qualitative evaluation of the SMS-text Adherence Support (StAR) trial. *BMC Family Practice*. 2015.

DOI: <https://doi.org/10.1186/s12875-015-0289-7>

**Bolarinwa 2019**

Bolarinwa OA, Juni MH, Nor Afiah MZ, Salmiah MS, Akande TM. Mid-term impact of home-based follow-up care on health-related quality of life of hypertensive patients at a teaching hospital in Ilorin, Nigeria. *Niger J Clin Pract*. 2019.

PMID: <https://europepmc.org/article/med/30666023>

**Cappuccio 2006**

Cappuccio FP, Kerry SM, Micah FB, Plange-Rhule J, Eastwood JB. A community programme to reduce salt intake and blood pressure in Ghana. *BMC Public Health*. 2006.

1  
2  
3 DOI: <https://doi.org/10.1186/1471-2458-6-13>  
4  
5

#### 6 **Charlton 2009**

7  
8 Charlton KE, Steyn K, Levitt NS, Peer N, Jonathan D, Gogela T, et al. A food-based dietary strategy  
9 lowers blood pressure in a low socio-economic setting: a randomised study in South Africa. Public  
10 Health Nutrition. 2008.

11  
12 DOI: <https://doi.org/10.1017/S136898000800342X>  
13

#### 14 **Fairall 2016**

15  
16 Fairall LR, Folb N, Timmerman V, Lombard C, Steyn K, Bachmann MO, et al. Educational Outreach  
17 with an Integrated Clinical Tool for Nurse-Led Non-communicable Chronic Disease Management in  
18 Primary Care in South Africa: A Pragmatic Cluster Randomised Controlled Trial. PLoS Medicine /  
19 Public Library of Science. 2016.

20  
21 DOI: <https://doi.org/10.1371/journal.pmed.1002178>  
22

23  
24 Folb N, Timmerman V, Levitt NS, Steyn K, Bachmann MO, Lund C, et al. Multimorbidity, control and  
25 treatment of noncommunicable diseases among primary healthcare attenders in the Western Cape,  
26 South Africa. S Afr Med J. 2015.

27  
28 DOI: <http://dx.doi.org/10.7196/SAMJNEW.7882>  
29

#### 30 **Goudge 2018**

31  
32 Goudge J, Chirwa T, Eldridge S, Gómez-Olivé FXF, Kabudula C, Limbani F, et al. Can lay health workers  
33 support the management of hypertension? Findings of a cluster randomised trial in South Africa. BMJ  
34 Glob Health. 2018.

35  
36 DOI: <https://doi.org/10.1136/bmjgh-2017-000577>  
37

#### 38 **Gyamfi 2017**

39  
40 Gyamfi J, Plange-Rhule J, Iwelunmor J, Lee D, Blackstone SR, Mitchell A, et al. Training nurses in task-  
41 shifting strategies for the management and control of hypertension in Ghana: a mixed-methods  
42 study. BMC Health Serv Res. 2017.

43  
44 DOI: <https://doi.org/10.1186/s12913-017-2026-5>  
45

46  
47 Ogedegbe G, Plange-Rhule J, Gyamfi J, Chaplin W, Ntim M, Apusiga K, et al. Health insurance  
48 coverage with or without a nurse-led task shifting strategy for hypertension control: A pragmatic  
49 cluster randomized trial in Ghana. PLoS Med. 2018.

50  
51 DOI: <https://doi.org/10.1371/journal.pmed.1002561>  
52

53  
54 Ogedegbe G, Plange-Rhule J, Gyamfi J, Chaplin W, Ntim M, Apusiga K, et al. A cluster-randomized trial  
55 of task shifting and blood pressure control in Ghana: study protocol. Implement Sci. 2014.

56  
57 DOI: <https://doi.org/10.1186/1748-5908-9-73>  
58

#### 59 **Labhardt 2011**

1  
2  
3 Labhardt ND, Balo JR, Ndam M, Manga E, Stoll B. Improved retention rates with low-cost  
4 interventions in hypertension and diabetes management in a rural African environment of nurse-led  
5 care: a cluster-randomised trial. *Tropical Medicine & International Health*. 2011.

6  
7 DOI: <https://doi.org/10.1111/j.1365-3156.2011.02827.x>  
8  
9

### 10 **Lamina 2010**

11  
12 Lamina S. Effects of continuous and interval training programs in the management of hypertension: a  
13 randomized controlled trial. *Journal of clinical hypertension*. 2010.

14  
15 DOI: <https://doi.org/10.1111/j.1751-7176.2010.00315.x>  
16  
17

18 Lamina S. Comparative effect of interval and continuous training programs on serum uric acid in  
19 management of hypertension: a randomized controlled trial. *Journal of Strength & Conditioning*  
20 *Research*. 2011.

21  
22 PMID: <https://www.ncbi.nlm.nih.gov/pubmed/20574413>  
23  
24

25 Lamina S, Okoye CG. Effect of low intensity continuous training programme on serum uric acid in the  
26 non pharmacological management of hypertension: a randomized controlled trial. *Nigerian journal of*  
27 *medicine : journal of the national association of resident doctors of nigeria*. 2010.

28  
29 PMID: <https://pubmed.ncbi.nlm.nih.gov/23672102/>  
30  
31

32 Lamina S, Okoye CG. Uricaemia as a cardiovascular events risk factor in hypertension: the role of  
33 interval training programme in its downregulation. *Journal of the Association of Physicians of India*.  
34 2011.

35  
36 PMID: <https://pubmed.ncbi.nlm.nih.gov/21751661/>  
37  
38

39 Lamina S, Okoye CG. Effect of interval training program on white blood cell count in the management  
40 of hypertension: A randomized controlled study. *Nigerian Medical Journal*. 2011.

41  
42 PMID: <https://pubmed.ncbi.nlm.nih.gov/22529513/>  
43  
44

45 Lamina S, Okoye CG, Dagogo TT. Managing erectile dysfunction in hypertension: the effects of a  
46 continuous training programme on biomarker of inflammation. *BJU international*. 2009.

47  
48 DOI: <https://doi.org/10.1111/j.1464-410X.2008.08254.x>  
49  
50

51 Lamina S, Okoye CG, Dagogo TT. Therapeutic effect of an interval exercise training program in the  
52 management of erectile dysfunction in hypertensive patients. *Journal of clinical hypertension*  
53 *(greenwich, conn) [Internet]*. 2009.

54  
55 DOI: <https://doi.org/10.1111/j.1751-7176.2009.00086.x>  
56  
57

58 Lamina S, Okoye CG, Hanif SM. Randomised controlled trial: effects of aerobic exercise training  
59 programme on indices of adiposity and metabolic markers in hypertension. *JPMA - Journal of the*  
60 *Pakistan Medical Association*. 2013.

1  
2  
3 PMID: <https://pubmed.ncbi.nlm.nih.gov/23901664/>  
4  
5

6 Lamina S, Okoye CG, Hanif SM. Effects of interval exercise training programme on the indices of  
7 adiposity and biomarker of inflammation in hypertension: a randomised controlled trial. Nigerian  
8 Postgraduate Medical Journal. 2014.  
9

10 PMID: <https://pubmed.ncbi.nlm.nih.gov/25126867/>  
11  
12

13 Lamina S, Okoye G. Effects of aerobic exercise training on psychosocial status and serum uric Acid in  
14 men with essential hypertension: a randomized controlled trial. Annals of Medical & Health Sciences  
15 Research. 2012.  
16

17 PMID: <https://pubmed.ncbi.nlm.nih.gov/23439606/>  
18  
19

20 Lamina S, Okoye GC. Therapeutic effect of a moderate intensity interval training program on the lipid  
21 profile in men with hypertension: a randomized controlled trial. Nigerian journal of clinical practice.  
22 2012.  
23

24 PMID: <https://pubmed.ncbi.nlm.nih.gov/22437088/>  
25  
26

27 Lamina S, Okoye GC. Effect of interval exercise training programme on C-reactive protein in the non-  
28 pharmacological management of hypertension: a randomized controlled trial. African journal of  
29 medicine and medical sciences. 2012.  
30

31 PMID: <https://pubmed.ncbi.nlm.nih.gov/23672102/>  
32  
33

### 34 **Maruf 2013**

35 Maruf FA, Akinpelu AO, Salako BL. Self-reported quality of life before and after aerobic exercise  
36 training in individuals with hypertension: a randomised-controlled trial. Applied Psychology Health  
37 and Well-being. 2013.  
38

39 DOI: <https://doi.org/10.1111/aphw.12005>  
40  
41

42 Maruf FA, Akinpelu AO, Salako BL, Akinyemi JO. Effects of aerobic dance training on blood pressure in  
43 individuals with uncontrolled hypertension on two antihypertensive drugs: a randomized clinical trial.  
44 Journal of the american society of hypertension. 2016.  
45

46 DOI: <https://doi.org/10.1016/j.jash.2016.02.002>  
47  
48

### 49 **Mendis 2010**

50 Mendis S, Johnston SC, Fan W, Oladapo O, Cameron A, Faramawi MF. Cardiovascular risk  
51 management and its impact on hypertension control in primary care in low-resource settings: a  
52 cluster-randomized trial. Bulletin of the World Health Organization. 2010.  
53

54 PMID: <https://www.ncbi.nlm.nih.gov/pmc/articles/PMC2878142/>  
55  
56

### 57 **Okeahialam 2011**

58 Okeahialam B, Ohihoin E, Ajuluchukwu J. Chronotherapy in Nigerian hypertensives. Therapeutic  
59 Advances in Cardiovascular Disease. 2011;5(2):113-8.  
60

1  
2  
3 DOI: <https://doi.org/10.1177%2F1753944711402119>  
4  
5

6 **Owolabi 2019**

7  
8 Owolabi MO, Gebregziabher M, Akinyemi RO, Akinyemi JO, Akpa O, Olaniyan O, et al. Randomized  
9 Trial of an Intervention to Improve Blood Pressure Control in Stroke Survivors. *Circulation*  
10 *Cardiovascular Quality & Outcomes*. 2019.

11 DOI: <https://doi.org/10.1161/CIRCOUTCOMES.119.005904>  
12  
13

14 **Sarfo 2019**

15  
16 Sarfo FS, Ovbiagele B. Stroke minimization through additive anti-atherosclerotic agents in routine  
17 treatment (SMAART): a pilot trial concept for improving stroke outcomes in sub-Saharan Africa.  
18 *Journal of the neurological sciences*. 2017.

19 DOI: <https://doi.org/10.1016/j.jns.2017.04.012>  
20  
21

22  
23 Sarfo FS, Treiber F, Gebregziabher M, Adamu S, Nichols M, Singh A, et al. Phone-based intervention  
24 for blood pressure control among Ghanaian stroke survivors: A pilot randomized controlled trial. *Int J*  
25 *Stroke*. 2019.

26 DOI: <https://doi.org/10.1177%2F1747493018816423>  
27  
28

29  
30 Sarfo FS, Treiber F, Jenkins C, Patel S, Gebregziabher M, Singh A, et al. Phone-based Intervention  
31 under Nurse Guidance after Stroke (PINGS): study protocol for a randomized controlled trial. *Trials*.  
32 2016.

33 DOI: <https://doi.org/10.1186/s13063-016-1557-0>  
34  
35

36  
37 **Saunders 1991**

38  
39 Saunders LD, Irwig LM, Gear JS, Ramushu DL. A randomized controlled trial of compliance improving  
40 strategies in Soweto hypertensives. *Medical Care*. 1991.

41 PMID: <https://pubmed.ncbi.nlm.nih.gov/2072772/>  
42  
43

44  
45 **Stewart 2005**

46  
47 Stewart A, Noakes T, Eales C, Shepard K, Becker P, Veriawa Y. Adherence to cardiovascular risk factor  
48 modification in patients with hypertension. *Cardiovascular journal of South Africa*. 2005

49 PMID: <https://pubmed.ncbi.nlm.nih.gov/15915277/>  
50  
51

52  
53 **Steyn 2013**

54  
55 Steyn K, Lombard C, Gwebushe N, Fourie JM, Everett-Murphy K, Zwarenstein M, et al.  
56 Implementation of national guidelines, incorporated within structured diabetes and hypertension  
57 records at primary level care in Cape Town, South Africa: a randomised controlled trial. *Glob Health*  
58 *Action*. 2013.

59 DOI: <http://dx.doi.org/10.3402/gha.v6i0.20796>  
60

**Turky 2013**

Turky K, Elnahas N, Oruch R. Effects of exercise training on postmenopausal hypertension: Implications on nitric oxide levels. Medical journal of Malaysia [Internet]. 2013.

PMID: <https://pubmed.ncbi.nlm.nih.gov/24632913/>

**Vedanthan 2019**

Vedanthan R, Kamano JH, DeLong AK, Naanyu V, Binanay CA, Bloomfield GS, et al. Community Health Workers Improve Linkage to Hypertension Care in Western Kenya. J Am Coll Cardiol. 2019.

DOI: <https://doi.org/10.1016/j.jacc.2019.08.003>

Vedanthan R, Kamano JH, Naanyu V, DeLong AK, Were MC, Finkelstein EA, et al. Optimizing linkage and retention to hypertension care in rural Kenya (LARK hypertension study): study protocol for a randomized controlled trial. Trials. 2014.

DOI: <https://doi.org/10.1186/1745-6215-15-143>

**Wahab 2017**

Wahab KW, Owolabi M, Akinyemi R, Jenkins C, Arulogun O, Akpa O, et al. Short-term pilot feasibility study of a nurse-led intervention to improve blood pressure control after stroke in Nigeria. Journal of the Neurological Sciences. 2017.

DOI: <https://doi.org/10.1016/j.jns.2017.04.005>



**Heart failure (N=13)**

1. Adigun AQ, Ajayi OE, Sofowora GG, Ajayi AA (1998) Vasodilator therapy of hypertensive acute left ventricular failure: comparison of captopril-prazosin with hydralazine-isosorbide dinitrate. *International Journal of Cardiology*, 67(1):81-6.
2. Ajayi AA, Balogun MO, Oyewo EA, Ladipo GO (1989) Enalapril in African patients with congestive cardiac failure. *British Journal of Clinical Pharmacology*, 27(3):400-3.
3. Ajayi AA, Sofowora GG, Adigun AQ, Asiyanbola B (2003) Adjunctive sympathoplegic therapy to ACE inhibition in Blacks with congestive heart failure: a comparison of alpha-1 with beta-1 blockade on exercise tolerance and cardiac sympathovagal reflex activity. *Ethnicity & Disease*, 13(1):71-9.
4. Ajiboye OA, Anigbogu CN, Ajuluchukwu JN, Jaja SI (2013) Therapeutic Effects of Exercise Training On Selected Cardio-Pulmonary Parameters and Body Composition of Nigerians with Chronic Heart Failure (A Preliminary Study). *Nigerian Quarterly Journal of Hospital Medicine*, 23(4):295-301.
5. Ajiboye OA, Anigbogu CN, Ajuluchukwu JN, Jaja SI (2015) Exercise training improves functional walking capacity and activity level of Nigerians with chronic biventricular heart failure. *Hong Kong Physiotherapy Journal* 33(1): 42-9.
6. Ibrahim MH, Elmahdy MA (2014) Improvement of exercise performance and ventilator efficiency in patients with chronic heart failure after sildenafil use for 8 weeks. *Egyptian Journal of Chest Diseases and Tuberculosis* 63(2): 477-81.
7. Mahgoub AA, El-Medany AH, Abdulatif AS (2002) A comparison between the effects of diltiazem and isosorbide dinitrate on digoxin pharmacodynamics and kinetics in the treatment of patients with chronic ischemic heart failure. *Saudi Medical Journal*, 23(6):725-31.
8. Mansour S, Youssef A, Rayan M, Ayman Saleh M (2011) Efficacy of ivabradine in idiopathic dilated cardiomyopathy patients with chronic heart failure. *Egyptian Heart Journal*63(2):79-85.
9. Marcus RH, Raw K, Patel J, Mitha A, Sareli P (1990) Comparison of intravenous amrinone and dobutamine in congestive heart failure due to idiopathic dilated cardiomyopathy. *American journal of cardiology* 66(15):1107-12.
10. Noura S, Boukef R, Bouida W, Kerkeni W, Beltaief K, Boubaker H, et al. (2011) Noninvasive pressure support ventilation and CPAP in cardiogenic pulmonary edema: a multicenter randomized study in the emergency department. *Intensive care medicine*, 37(2):249-56.
11. Sliwa K, Damasceno A, Davison BA, Mayosi BM, Sani MU, Ogah O, et al. (2016) Bitreatment with hydralazine/nitrates vs. placebo in Africans admitted with acute Heart Failure (BA-HEF). *European Journal of Heart Failure*, 18(10):1248-58.
12. Sliwa K, Norton GR, Kone N, Candy G, Kachope J, Woodiwiss AJ, et al. (2004) Impact of initiating carvedilol before angiotensin-converting enzyme inhibitor therapy on cardiac function in newly diagnosed heart failure. *Journal of the American College of Cardiology*, 44(9):1825-30.
13. Wisenbaugh T, Katz I, Davis J, Essop R, Skoularigis J, Middlemost S, et al. (1993) Longterm (3-month) effects of a new beta-blocker (nebivolol) on cardiac performance in dilated cardiomyopathy. *Journal of the American College of Cardiology*, 21(5):1094-100.

**Coronary heart disease (N=7)**

1. Adel M, Mansour S, Sabri NA, Badary OA, Ayman Saleh M (2016) A clinical study evaluating the effect of ivabradine on inflammation in patients with non ST-segment elevation acute coronary syndromes. *International Journal of Pharmaceutical Sciences and Research*, 7(4):1441-9.



2. Ahmed RM, Mohamed el HA, Ashraf M, Maithili S, Nabil F, Rami R, et al. (2013) Effect of remote ischemic preconditioning on serum troponin T level following elective percutaneous coronary intervention. *Catheterization & Cardiovascular Interventions*, 82(5):E647-53.
3. Coetzee A, Roussouw G, Macgregor L (1996) Failure of allopurinol to improve left ventricular stroke work after cardiopulmonary bypass surgery. *Journal of cardiothoracic and vascular anesthesia*, 10(5):627-33.
4. Hamza MA, Galal A, Suweilam S, Ismail M (2014) Local intracoronary eptifibatid versus mechanical aspiration in patients with acute ST-elevation myocardial infarction. *International journal of vascular medicine*. Available from: <http://onlinelibrary.wiley.com/doi/10.1111/ijvm.12189>
5. Harilall Y, Adam JK, Biccard BM, Reddi A (2014) The effect of optimising cerebral tissue oxygen saturation on markers of neurological injury during coronary artery bypass graft surgery. *Heart, Lung & Circulation*, 23(1):68-74.
6. Nassar YS, Laimud M, Afify M, Shawky MA (2014) Platelet aggregation inhibition by Eptifibatid versus high dose Tirofiban during primary percutaneous interventions. *Egyptian Heart Journal*, 66(3): 241-50.
7. Shehata M, Fayez G, Nassar A (2015) Intensive Statin Therapy in NSTEMI-ACS Patients Undergoing PCI: Clinical and Biochemical Effects. *Texas Heart Institute Journal*, 42(6):528-36.

#### **Pharmacotherapy for hypertension (N=76)**

1. Abengowe CU (1985) A double-blind comparison of acebutolol (Sectral) and propranolol (Inderal) in the treatment of hypertension in black Nigerian patients. *Journal of International Medical Research*. 13(2):116-21
2. Abson CP, Levy LM, Eyherabide G (1981) Once-daily atenolol in hypertensive Zimbabwean blacks. A double-blind trial using two different doses. *South African Medical Journal Suid-Afrikaanse Tydskrif Vir Geneeskunde* 60(2):47-8.
3. Ahaneku JE, Agbedana OE, Taylor OG (1995) Relationship between body mass index (BMI) and changes in plasma total and HDL-cholesterol levels during treatment of hypertension in African patients. *Acta Medica Okayama*. 49(5):267.
4. Ajayi AA, Oyewo EA, Ladipo GO, Akinsola A (1989) Enalapril and hydrochlorothiazide in hypertensive Africans. *European Journal of Clinical Pharmacology*. 36(3):229-34.
5. Ajayi AA, Akintomide AO (1995) The efficacy and tolerability of amlodipine and hydrochlorothiazide in Nigerians with essential hypertension. *Journal of the National Medical Association*. 87(7):485-8.
6. Bosman AR, Goldberg B, McKechnie JK, Offermeier J, Oosthuizen OJ (1977) South African multicentre study of metoprolol and propranolol in essential hypertension. *South African Medical Journal Suid-Afrikaanse Tydskrif Vir Geneeskunde*. 51(3):57-61.
7. Cilliers AJ (1979) Atenolol as primary therapy in previously untreated hypertensives and as an adjuvant to other therapy. A South African Multicentre Study. *South African Medical Journal Suid-Afrikaanse Tydskrif Vir Geneeskunde*. 55(9):321-4.
8. Daniels AR, Opie LH (1987) Monotherapy with the calcium channel antagonist nisoldipine for systemic hypertension and comparison with diuretic drugs. *American journal of cardiology* 60(8): 703-7.

- 1  
2  
3 9. Dean G, Louw S, Hersch C, Kirsten HO, Brereton DN, Finnemore L, et al. (1971) A double-blind trial  
4 in hypertension comparing Baycaron (FBA 1500), hydrochlorothiazide and placebo. South African  
5 Medical Journal Suid-Afrikaanse Tydskrif Vir Geneeskunde. 45(12):323.
- 6  
7 10. Djoumessi RN, Noubiap JJ, Kaze FF, et al. (2016) Effect of low-dose spironolactone on resistant  
8 hypertension in type 2 diabetes mellitus: a randomized controlled trial in a sub-Saharan African  
9 population. BMC Res Notes. 9:187.
- 10  
11 11. Fadayomi MO, Akinroye KK, Ajao RO, Awosika LA (1986) Monotherapy with nifedipine for essential  
12 hypertension in adult blacks. Journal of Cardiovascular Pharmacology. 8(3):466-9.
- 13  
14 12. Farag, SM, Rabea HM, Mahmoud HB (2018) Effect of Amlodipine/Valsartan Versus  
15 Nebivolol/Valsartan Fixed Dose Combinations on Peripheral and Central Blood Pressure. High Blood  
16 Pressure & Cardiovascular Prevention. 25:407-13.
- 17  
18 13. Goodman C, Rosendorff C, Coull A (1985) Comparison of the antihypertensive effect of enalapril  
19 and propranolol in black South Africans. South African Medical Journal Suid-Afrikaanse Tydskrif Vir  
20 Geneeskunde. 67(17):672-6.
- 21  
22 14. Habte B (1992) The efficacy of hydrochlorothiazide, timolol and enalapril in Ethiopians with  
23 essential hypertension. Ethiop Med J 30: 163–7.
- 24  
25 15. Isles CG, Johnson AO, Milne FJ (1986) Slow release nifedipine and atenolol as initial treatment in  
26 blacks with malignant hypertension. British journal of clinical pharmacology 21(4): 377-83.
- 27  
28 16. Iyalomhe GB, Omogbai EK, Isah AO, Iyalomhe OO, Dada FL, Iyalomhe SI (2013) Efficacy of initiating  
29 therapy with amlodipine and hydrochlorothiazide or their combination in hypertensive Nigerians.  
30 Clinical & Experimental Hypertension 35(8):620-7.
- 31  
32 17. Iyalomhe GBSOEKIIOOBISI. (2013) Long-term effects of amlodipine and hydrochlorothiazide  
33 combination therapy on creatinine clearance in hypertensive Nigerians. Global journal of  
34 pharmacology. 7(1): 45-51.
- 35  
36 18. Iyalomhe GBS, Omogbai EKI, Ozolua RI (2007) Antihypertensive and some biochemical effects of  
37 hydrochlorothiazide and furosemide in some Nigerians. Journal of medical sciences (Taipei, Taiwan)  
38 7(6): 977-83.
- 39  
40 19. Iyalomhe GBS, Omogbai EKI, Ozolua RI, Iyalomhe OOB (2008) Effects of hydrochlorothiazide and  
41 furosemide on creatinine clearance in some hypertensive Nigerians. African journal of biotechnology  
42 7 (7): 848-51.
- 43  
44 20. Leary WP, Maharaj B (1990) Comparison of felodipine and hydrochlorothiazide for the treatment  
45 of mild to moderate hypertension in black Africans. Journal of Cardiovascular Pharmacology. 15 Suppl  
46 4:S91-3.
- 47  
48 21. Leary WP, Reyes AJ, Byl K, Maharaj B (1987) Comparative antihypertensive effects of ketanserin  
49 and a ketanserin-hydrochlorothiazide combination administered once daily. Journal of cardiovascular  
50 pharmacology 10 Suppl 3: 127-34.
- 51  
52 22. Leary WP, Reyes AJ, Maharaj B, Byl K (1991) Time course of the blood pressure response to oral  
53 isradipine in uncomplicated mild-to-moderate essential hypertension. American journal of  
54 hypertension 4(2 Pt 2): 147-50.
- 55  
56 23. Levenstein JH (1978) Oxprenolol slow-release with cyclopentiazide-KCl compared with  
57 methyldopa in the treatment of essential hypertension. A multicentre general practice trial. South  
58 African Medical Journal Suid-Afrikaanse Tydskrif Vir Geneeskunde. 54(21):860-4.
- 59  
60

- 1
- 2
- 3 24. Lubbe WF (1974) Clonidine in the management of uncontrolled hypertension. *South African*
- 4 *medical journal* 48(10): 391-6.
- 5
- 6 25. Mabadeje AFB (1977) Controlled clinical trial between oxprenolol and methyldopa in hypertensive
- 7 Nigerians. *Current therapeutic research - clinical and experimental* 22(3): 391-7.
- 8
- 9 26. Mabadeje AF, Adebayo GI (1989) Comparative effects of labetalol and bromazepam on ambulatory
- 10 blood pressure of Nigerians with labile and stress hypertension. *Clinical & Experimental Hypertension*
- 11 *- Part A, Theory & Practice.* 11 Suppl 1:441-7.
- 12
- 13 27. Maharaj B, Byl K (1992) A comparison of the acute hypotensive effects of two different doses of
- 14 nifedipine. *American heart journal* 124(3): 720-5.
- 15
- 16 28. Maharaj B, Byl K (1993) Randomised double-blind comparative study of efficacy and safety of
- 17 hydroflumethiazide and reserpine and chlortalidone and atenolol in the treatment of mild to moderate
- 18 hypertension in black patients. *Journal of human hypertension* 7(5): 447-50.
- 19
- 20 29. Maharaj B, Byl K (1993) A comparative study of isradipine SRO and enalapril in black patients with
- 21 mild-to-moderate hypertension. *American journal of hypertension* 6(3 Pt 2): 80-1.
- 22
- 23 30. Mangoush M, Singh NK, Kumar S, Basha A, Gupta BS, Bolya YK, et al. (1990) Efficacy of enalapril in
- 24 essential hypertension and its comparison with atenolol. *Postgraduate medical journal* 66 (776): 446-
- 25 9.
- 26
- 27 31. Manyemba J (1997) A randomised crossover comparison of reserpine and sustained-release
- 28 nifedipine in hypertension. *Central African Journal of Medicine.* 43(12):344-9.
- 29
- 30 32. M'Buyamba-Kabangu JR, Anisiuba BC, Ndiaye MB, Lemogoum D, Jacobs L, Ijoma CK, et al. (2013)
- 31 Efficacy of newer versus older antihypertensive drugs in black patients living in sub-Saharan Africa.
- 32 *Journal of Human Hypertension.* 27(12):729-35.
- 33
- 34 33. Osakwe CE, Jacobs L, Anisiuba BC, Ndiaye MB, Lemogoum D, Ijoma CK, et al. (2014) Heart rate
- 35 variability on antihypertensive drugs in black patients living in sub-Saharan Africa. *Blood Pressure,*
- 36 *23(3):174-80.*
- 37
- 38 34. M'Buyamba-Kabangu JR, Lepira B, Lijnen P, Tshiani K, Fagard R, Amery A (1988) Intracellular sodium
- 39 and the response to nitrendipine or atenolol in African blacks. *Hypertension.* 11(1):100-5
- 40
- 41 35. Mengesha HG, Welegerima AH, Hadgu A, Temesgen H, Otieno MG, Tsegay K, Fisseha T, Getachew
- 42 S, Merha Z, Tewodros H, Dabessa J, Gebreegzabher B, Petrucka P (2018) Comparative effectiveness of
- 43 antihypertensive drugs prescribed in Ethiopian healthcare practice: A pilot prospective, randomized,
- 44 open label study. *PLoS ONE* 13(9): e0203166. <https://doi.org/10.1371/journal.pone.0203166>.
- 45
- 46 36. Middlemost SJ, Tager R, Davis J, Sareli P (1994) Effectiveness of enalapril in combination with low-
- 47 dose hydrochlorothiazide versus enalapril alone for mild to moderate systemic hypertension in black
- 48 patients. *American journal of cardiology* 73(15):1092-7.
- 49
- 50 37. Mngola EN (1980) The use of a spironolactone and althiazide combination (aldactacine) in the
- 51 treatment of benign essential hypertension. *Journal of International Medical Research.* 8(3):199-204.
- 52
- 53 38. Norton GR, Woodiwiss AJ, Hartford C, Trifunovic B, Middlemost S, Lee A, et al. (1999) Sustained
- 54 antihypertensive actions of a dual angiotensin-converting enzyme neutral endopeptidase inhibitor,
- 55 sampatrilat, in black hypertensive subjects. *American journal of hypertension* 12(6): 563-71.
- 56
- 57 40. Nwachukwu DC, Aneke E, Nwachukwu NZ, Obika LF, Nwagha UI, Eze AA (2015) Effect of Hibiscus
- 58 sabdariffa on blood pressure and electrolyte profile of mild to moderate hypertensive Nigerians: A
- 59 comparative study with hydrochlorothiazide. *Nigerian Journal of Clinical Practice.* 18(6):762-70.
- 60

- 1
- 2
- 3
- 4 41. Nwachukwu DC, Aneke EI, Nwachukwu NZ, Azubike N, Obika LF (2017) Does consumption of an
- 5 aqueous extract of Hibiscus sabdariffa affect renal function in subjects with mild to moderate
- 6 hypertension? *Journal of Physiological Sciences: JPS*, 67(1):227-34.
- 7
- 8 42. Nwachukwu DC, Aneke EI, Obika LF, Nwachukwu NZ (2015) Effects of aqueous extract of Hibiscus
- 9 sabdariffa on the renin-angiotensin-aldosterone system of Nigerians with mild to moderate essential
- 10 hypertension: A comparative study with lisinopril. *Indian Journal of Pharmacology*, 47(5):540-5.
- 11
- 12 43. Nwachukwu DC, Eze AA, Nwachukwu NZ, Aneke EI, Agu PU, Azubike NC, et al.(2017) Monotherapy
- 13 with amlodipine or hydrochlorothiazide in patients with mild to moderate hypertension: Comparison
- 14 of their efficacy and effects on electrolytes, *Malawi Medical Journal* 29 (2): 108-112.
- 15
- 16 44. Obel AO, Gitau W (1981) Comparison of the antihypertensive effect of metipranolol, butizide and
- 17 torrat in Kenyan Africans. *East African Medical Journal*. 58(11):867-71.
- 18
- 19 45. Obel AO (1983) A comparison of timolol plus hydrochlorothiazide plus amiloride and methyldopa
- 20 in essential hypertension in Black Africans. *Tropical & Geographical Medicine*. 35(3):285-91.
- 21
- 22 46. Obel A, Griffin L, Were J (1984) Comparison of slow-release frusemide (Lasix Retard) and
- 23 bendrofluazide in the treatment of moderate hypertension in Kenyan negroes. *Clinical trials* 1(6): 443-
- 24 50.
- 25
- 26 47. Obel AO (1989) Placebo-controlled trial of potassium supplements in black patients with mild
- 27 essential hypertension. *Journal of cardiovascular pharmacology* 14(2): 294-6.
- 28
- 29 48. Obel AO (1989) Effects of chlorthalidone, oxprenolol, and their combination in hypertensive blacks:
- 30 a randomized double-blind crossover study. *Journal of cardiovascular pharmacology* 13(3): 465-70.
- 31
- 32 49. Obel AO (1990) Efficacy and tolerability of long term oxprenolol and chlorthalidone singly and in
- 33 combination in hypertensive blacks. *Japanese heart journal* 31(2): 183-92.
- 34
- 35 50. Obel AO, Koeh DK. (1991) Potassium supplementation versus bendrofluazide in mildly to
- 36 moderately hypertensive Kenyans. *Journal of Cardiovascular Pharmacology*. 17(3):504-7.
- 37
- 38 51. Ogola EN, Yonga GO (1993) Comparative study of the efficacy and tolerability of
- 39 hydroflumethiazide versus propranolol in Africans with mild to moderate hypertension. *East African*
- 40 *Medical Journal*. 70(5):277-9.
- 41
- 42 52. Ojii DB, Mayosi B, Francis V, Badri M, Cornelius V, Poulter N et al. (2019) Comparison of Dual
- 43 Therapies for Lowering Blood Pressure in Black Africans. *The New England Journal of Medicine*
- 44 380:2429-2439.
- 45
- 46 53. Okeahialam BN, Ohihoin EN, Ajuluchukwu JN (2012) Diuretic drugs benefit patients with
- 47 hypertension more with night-time dosing. *Therapeutic Advances in Drug Safety*, 3(6):273-8.
- 48
- 49 54. Onwubere BJ, Obodo JO, Oke DA, Okeahialam BN, Danbauchi SS, Mbakwem AC (2001) A
- 50 randomised trial to compare the efficacy and safety of Felodipine (Plendil) and Nifedipine (Adalat)
- 51 retard in patients with mild-to-moderate hypertension. *West African Journal of Medicine*. 20(4):196-
- 52 202.
- 53
- 54 55. Opie LH, Müller FO, Myburgh DP, Rosendorff C, Sareli P, Seedat YK, et al. (1997) Efficacy and
- 55 tolerability of nisoldipine coat-core formulation in the treatment of essential hypertension: the South
- 56 African Multicenter ANCHOR Study. *Ambulatory Nisoldipine Coat-Core Hypertension Outpatient*
- 57 *Response (ANCHOR) Investigators*. *American journal of hypertension* 10(3): 250-60.
- 58
- 59 56. Opie LH, Haus M, Commerford PJ, Levetan B, Moore K, Brink J (2002) Antihypertensive effects of
- 60 angiotensin converting enzyme inhibition by lisinopril in post-transplant patients. *American journal of*
- hypertension 15(10 Pt 1): 911-6.

- 1  
2  
3 57. Poulter NR, Sanderson JE, Thompson AV, Sever PS, Chang CL (1993) Comparison of nifedipine and  
4 propranolol as second line agent for hypertension in black Kenyans. *BMJ* 306(6878): 621-2.  
5  
6 58. Radevski I, Skudicky D, Candy G, Sathekge S, Strugo V, Sareli P (1999) Antihypertensive  
7 monotherapy with nisoldipine CC is superior to enalapril in black patients with severe hypertension.  
8 *American Journal of Hypertension*. 12(2 Pt 1):194-203.  
9  
10 59. Radevski IV, Valtchanova ZP, Candy GP, Wald AM, Ngcezula T, Sareli P (2002). Comparison of  
11 indapamide and low-dose hydrochlorothiazide monotherapy in black patients with mild to moderate  
12 hypertension. *South African Medical Journal Suid-Afrikaanse Tydskrif Vir Geneeskunde*. 92(7):532-6.  
13  
14 60. Rogers, GG, Rosendorff C, Goodman C, Radford HM (1988) Effects of angiotensin converting  
15 enzyme inhibition and beta-blockade on exercise responses in hypertensive patients: *Journal of*  
16 *Hypertension*, 6 (4): 662–S665.  
17  
18 61. Salako LA, Falase AO, Aderounmu AF (1979) Placebo-controlled, double-blind clinical trial of  
19 alprenolol in African hypertensive patients. *Current Medical Research & Opinion*. 6(5):358-63.  
20  
21 62. Salako LA, Falase AO, Aderounmu AF (1979) Comparative beta-adrenoreceptor-blocking effects  
22 and pharmacokinetics of propranolol and pindolol in hypertensive Africans. *Clinical Science*. 57 Suppl  
23 5:393-6.  
24  
25 63. Salako LA, Falase AO, Aderounmu AF, Walker O (1990) Assessment of a fixed-dosage combination  
26 of atenolol and chlorthalidone (Tenoretic) in hypertensive Nigerians. *African Journal of Medicine &*  
27 *Medical Sciences*. 19(1):57-61.  
28  
29 64. Salako BL, Kadiri S, Walker O, Fehintola FA (1998) Evaluation of lacidipine (a calcium blocker) in the  
30 treatment of hypertension in black African people: a double-blind comparison with  
31 hydrochlorothiazide. *African Journal of Medicine & Medical Sciences*. 27(1-2):73-5  
32  
33 65. Sareli P, Radevski IV, Valtchanova ZP, Libhaber E, Candy GP, Den Hond E, et al. (2001) Efficacy of  
34 different drug classes used to initiate antihypertensive treatment in black subjects: results of a  
35 randomized trial in Johannesburg, South Africa. *Archives of Internal Medicine*. 161(7):965-71.  
36  
37 66. Seedat YK (1980) Trial of atenolol and chlorthalidone for hypertension in black South Africans.  
38 *British Medical Journal*. 281(6250):1241-3.  
39  
40 67. Seedat YK, Parag KB (1987) A comparison of lisinopril and atenolol in black and Indian patients with  
41 mild-to-moderate essential hypertension. *South African Medical Journal Suid-Afrikaanse Tydskrif Vir*  
42 *Geneeskunde*. 71(3):149-53.  
43  
44 68. Seedat YK, Parag KB, Nathoo BC (1990) Nitrendipine in a fixed stepped-dose study compared with  
45 methyldopa in black and Indian hypertensive patients. *Current therapeutic research - clinical and*  
46 *experimental* 48(1): 10-9.  
47  
48 69. Skoularigis J, Eitzman L, Davis J, Strugo V, Sareli P (1994) Nifedipine versus captopril in the  
49 management of moderate hypertension in black patients. *American journal of hypertension* 7(5): 440-  
50 7.  
51  
52 70. Skoularigis J, Strugo V, Zambakides C, Eintracht S, Reddy K, Tshele E, et al. (1996) Comparison of  
53 captopril-thiazide and enalapril-thiazide combinations in the management of mild to moderate black  
54 hypertensive patients: how important is diuretic dose and duration of action of the ACE-inhibitor?  
55 *International journal of clinical pharmacology and therapeutics* 34(6): 263-8.  
56  
57 71. Sobngwi E, Mfeukeu-Kuate L, Kouam M, Tankeu AT, Nganou-Gnindjio CN, Hamadou B, et al. (2019)  
58 Short-term effects of perindopril-amlodipine vs perindopril-indapamide on blood pressure control in  
59  
60

1  
2  
3 sub-Saharan type 2 diabetic individuals newly diagnosed for hypertension: A double-blinded  
4 randomized controlled trial, *Journal of Clinical Hypertension*. 21:1002-9.

5  
6 72. Stein CM, Neill P, Kusemamuriwo T (1992) Antihypertensive effects of low doses of  
7 hydrochlorothiazide in hypertensive black Zimbabweans. *International Journal of Cardiology*.  
8 37(2):231-5.  
9

10 73. Venter CP, Joubert PH, Booyens J (1988) Effects of essential fatty acids on mild to moderate  
11 essential hypertension. *Prostaglandins, leukotrienes, and essential fatty acids* 33(1): 49-51.  
12

13 74. Venter CP, Venter HL, Muntingh GL (1991) The effect of enalapril and prazosin on mild to moderate  
14 hypertension in black Africans. *Results of a clinical trial. South African medical journal* 80(7): 324-6.  
15

16 75. Wadhawan DN (1981) Antihypertensive therapy with diuretics without potassium supplement.  
17 *Medical journal of zambia* 16(1): 4-6.  
18

19 76. Wahab KW, Owolabi M, Akinyemi R, Jenkins C, Arulogun O, Akpa O, et al. (2017) Shortterm pilot  
20 feasibility study of a nurse-led intervention to improve blood pressure control after stroke in Nigeria.  
21 *Journal of the Neurological Sciences*. 377:116-20.  
22  
23  
24  
25  
26  
27  
28  
29  
30  
31  
32  
33  
34  
35  
36  
37  
38  
39  
40  
41  
42  
43  
44  
45  
46  
47  
48  
49  
50  
51  
52  
53  
54  
55  
56  
57  
58  
59  
60





# PRISMA 2009 Checklist

| Section/topic                      | #  | Checklist item                                                                                                                                                                                                                                                                                              | Reported on page #    |
|------------------------------------|----|-------------------------------------------------------------------------------------------------------------------------------------------------------------------------------------------------------------------------------------------------------------------------------------------------------------|-----------------------|
| <b>TITLE</b>                       |    |                                                                                                                                                                                                                                                                                                             |                       |
| Title                              | 1  | Identify the report as a systematic review, meta-analysis, or both.                                                                                                                                                                                                                                         | 1                     |
| <b>ABSTRACT</b>                    |    |                                                                                                                                                                                                                                                                                                             |                       |
| Structured summary                 | 2  | Provide a structured summary including, as applicable: background; objectives; data sources; study eligibility criteria, participants, and interventions; study appraisal and synthesis methods; results; limitations; conclusions and implications of key findings; systematic review registration number. | 2                     |
| <b>INTRODUCTION</b>                |    |                                                                                                                                                                                                                                                                                                             |                       |
| Rationale                          | 3  | Describe the rationale for the review in the context of what is already known.                                                                                                                                                                                                                              | 4                     |
| Objectives                         | 4  | Provide an explicit statement of questions being addressed with reference to participants, interventions, comparisons, outcomes, and study design (PICOS).                                                                                                                                                  | 4,5                   |
| <b>METHODS</b>                     |    |                                                                                                                                                                                                                                                                                                             |                       |
| Protocol and registration          | 5  | Indicate if a review protocol exists, if and where it can be accessed (e.g., Web address), and, if available, provide registration information including registration number.                                                                                                                               | 2,6                   |
| Eligibility criteria               | 6  | Specify study characteristics (e.g., PICOS, length of follow-up) and report characteristics (e.g., years considered, language, publication status) used as criteria for eligibility, giving rationale.                                                                                                      | 6                     |
| Information sources                | 7  | Describe all information sources (e.g., databases with dates of coverage, contact with study authors to identify additional studies) in the search and date last searched.                                                                                                                                  | 6                     |
| Search                             | 8  | Present full electronic search strategy for at least one database, including any limits used, such that it could be repeated.                                                                                                                                                                               | 6, supplementary file |
| Study selection                    | 9  | State the process for selecting studies (i.e., screening, eligibility, included in systematic review, and, if applicable, included in the meta-analysis).                                                                                                                                                   | 6                     |
| Data collection process            | 10 | Describe method of data extraction from reports (e.g., piloted forms, independently, in duplicate) and any processes for obtaining and confirming data from investigators.                                                                                                                                  | 6,7                   |
| Data items                         | 11 | List and define all variables for which data were sought (e.g., PICOS, funding sources) and any assumptions and simplifications made.                                                                                                                                                                       | 7                     |
| Risk of bias in individual studies | 12 | Describe methods used for assessing risk of bias of individual studies (including specification of whether this was done at the study or outcome level), and how this information is to be used in any data synthesis.                                                                                      | 8                     |
| Summary measures                   | 13 | State the principal summary measures (e.g., risk ratio, difference in means).                                                                                                                                                                                                                               | 8                     |

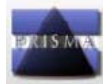

# PRISMA 2009 Checklist

|                      |    |                                                                                                                                                           |   |
|----------------------|----|-----------------------------------------------------------------------------------------------------------------------------------------------------------|---|
| Synthesis of results | 14 | Describe the methods of handling data and combining results of studies, if done, including measures of consistency (e.g., $I^2$ ) for each meta-analysis. | 8 |
|----------------------|----|-----------------------------------------------------------------------------------------------------------------------------------------------------------|---|

Page 1 of 2

| Section/topic                 | #  | Checklist item                                                                                                                                                                                           | Reported on page #             |
|-------------------------------|----|----------------------------------------------------------------------------------------------------------------------------------------------------------------------------------------------------------|--------------------------------|
| Risk of bias across studies   | 15 | Specify any assessment of risk of bias that may affect the cumulative evidence (e.g., publication bias, selective reporting within studies).                                                             | 8                              |
| Additional analyses           | 16 | Describe methods of additional analyses (e.g., sensitivity or subgroup analyses, meta-regression), if done, indicating which were pre-specified.                                                         | 8                              |
| <b>RESULTS</b>                |    |                                                                                                                                                                                                          |                                |
| Study selection               | 17 | Give numbers of studies screened, assessed for eligibility, and included in the review, with reasons for exclusions at each stage, ideally with a flow diagram.                                          | 9                              |
| Study characteristics         | 18 | For each study, present characteristics for which data were extracted (e.g., study size, PICOS, follow-up period) and provide the citations.                                                             | 9                              |
| Risk of bias within studies   | 19 | Present data on risk of bias of each study and, if available, any outcome level assessment (see item 12).                                                                                                | 12, Table 3                    |
| Results of individual studies | 20 | For all outcomes considered (benefits or harms), present, for each study: (a) simple summary data for each intervention group (b) effect estimates and confidence intervals, ideally with a forest plot. | 10,11                          |
| Synthesis of results          | 21 | Present results of each meta-analysis done, including confidence intervals and measures of consistency.                                                                                                  | None done, narrative synthesis |
| Risk of bias across studies   | 22 | Present results of any assessment of risk of bias across studies (see Item 15).                                                                                                                          | 12, Figure 5                   |
| Additional analysis           | 23 | Give results of additional analyses, if done (e.g., sensitivity or subgroup analyses, meta-regression [see Item 16]).                                                                                    | None done                      |
| <b>DISCUSSION</b>             |    |                                                                                                                                                                                                          |                                |
| Summary of evidence           | 24 | Summarize the main findings including the strength of evidence for each main outcome; consider their relevance to key groups (e.g., healthcare providers, users, and policy makers).                     | 13,14, 15                      |
| Limitations                   | 25 | Discuss limitations at study and outcome level (e.g., risk of bias), and at review-level (e.g., incomplete retrieval of identified research, reporting bias).                                            | 15, 16                         |
| Conclusions                   | 26 | Provide a general interpretation of the results in the context of other evidence, and implications for future research.                                                                                  | 17                             |





# PRISMA 2009 Checklist

| FUNDING |    |                                                                                                                                            |    |
|---------|----|--------------------------------------------------------------------------------------------------------------------------------------------|----|
| Funding | 27 | Describe sources of funding for the systematic review and other support (e.g., supply of data); role of funders for the systematic review. | 19 |

From: Moher D, Liberati A, Tetzlaff J, Altman DG, The PRISMA Group (2009). Preferred Reporting Items for Systematic Reviews and Meta-Analyses: The PRISMA Statement. PLoS Med 6(7): e1000097. doi:10.1371/journal.pmed1000097

For more information, visit: [www.prisma-statement.org](http://www.prisma-statement.org).

Page 2 of 2

For peer review only
