# Supplementary material for: Non-pharmacological interventions to achieve blood pressure control in African patients: a systematic review
Source: PubMed Central journal article supplement — BMJ Open. 2022 Feb 28;12(2):e048079. doi: 10.1136/bmjopen-2020-048079 (PMC8886440; doi:10.1136/bmjopen-2020-048079), 2022-02-28
Supplement: bmjopen-2020-048079supp001.pdf [file bmjopen-2020-048079supp001.pdf]

## Search strategies

### Medline (Ovid): Search on CVDs

| Nr.               | Searches (24th July 2017)                  | Results |
|-------------------|--------------------------------------------|---------|
| <b>Indication</b> |                                            |         |
| 1.                | exp heart diseases/                        |         |
| 2.                | exp vascular diseases/                     |         |
| 3.                | cerebrovascular disorders/                 |         |
| 4.                | exp brain ischemia/                        |         |
| 5.                | exp carotid artery diseases/               |         |
| 6.                | exp dementia, vascular/                    |         |
| 7.                | exp intracranial arterial diseases/        |         |
| 8.                | exp intracranial embolism/ and thrombosis/ |         |
| 9.                | exp intracranial hemorrhages/              |         |
| 10.               | exp stroke/                                |         |
| 11.               | exp hyperlipidemias/                       |         |
| 12.               | Exp hypercholesteremia/                    |         |
| 13.               | exp Myocardial Ischemia/                   |         |
| 14.               | angina.tw                                  |         |
| 15.               | (heart adj3 disease\$.tw.                  |         |
| 16.               | (coronary adj3 disease\$.tw.               |         |
| 17.               | (peripheral adj3 disease\$.tw.             |         |
| 18.               | (cerebrovascular disease).tw               |         |
| 19.               | Renal artery stenosis.tw                   |         |
| 20.               | (Aortic aneurism or Aneurysm\$.tw          |         |
| 21.               | myocardial infarct\$.tw.                   |         |
| 22.               | exp Myocardial Revascularization/          |         |
| 23.               | (coronary adj3 bypass\$.tw.                |         |
| 24.               | (coronary adj3 angioplast\$.tw.            |         |
| 25.               | (heart adj3 infarct\$.tw.                  |         |
| 26.               | postmyocardial infarct\$.tw.               |         |
| 27.               | cardiovascular diseases/                   |         |
| 28.               | Hypertens\$.tw                             |         |
| 29.               | (high adj2 blood pressure).tw              |         |
| 30.               | (blood pressure control).tw                |         |
| 31.               | Hypertensive heart disease.tw.             |         |
| 32.               | Cardiomyopath\$.tw.                        |         |
| 33.               | Heart failure.tw.                          |         |

| Nr.                                 | Searches (24th July 2017)                                           | Results          |
|-------------------------------------|---------------------------------------------------------------------|------------------|
| 34.                                 | (Pulmonary heart disease).tw                                        |                  |
| 35.                                 | Cardiac dysrhythmia*.tw.                                            |                  |
| 36.                                 | Inflammatory heart disease.tw.                                      |                  |
| 37.                                 | Endocarditis.tw.                                                    |                  |
| 38.                                 | Cardiomegaly.tw                                                     |                  |
| 39.                                 | Valvular heart disease.tw.                                          |                  |
| 40.                                 | Rheumatic heart disease.tw                                          |                  |
| 41.                                 | Myocarditis.tw                                                      |                  |
| 42.                                 | Arrhythmi\$.tw                                                      |                  |
| 43.                                 | Vasculitis.tw                                                       |                  |
| <b>44.</b>                          | <b>or/1-43</b>                                                      | <b>2 498 192</b> |
| <b>Africa and African countries</b> |                                                                     |                  |
| 45.                                 | Africa.tw                                                           |                  |
| 46.                                 | Exp Africa/                                                         |                  |
| 47.                                 | Algeria\$.tw or exp Algeria/                                        |                  |
| 48.                                 | Angol\$.tw or exp Angola/                                           |                  |
| 49.                                 | Benin\$.tw or exp Benin/                                            |                  |
| 50.                                 | Botswan\$.tw or exp Botswana/                                       |                  |
| 51.                                 | Burkina Faso.tw or exp Burkina Faso/                                |                  |
| 52.                                 | Burund\$.tw or exp Burundi/                                         |                  |
| 53.                                 | Cameroon\$.tw or exp Cameroon/                                      |                  |
| 54.                                 | Cape Verde.tw or exp Cape Verde/                                    |                  |
| 55.                                 | Central African Republic\$.tw or exp Central African Republic/      |                  |
| 56.                                 | Chad\$.tw or exp Chad/                                              |                  |
| 57.                                 | Comoros\$.tw or exp Comoros/                                        |                  |
| 58.                                 | Cote d'Ivoire.tw or exp Cote d'Ivoire/                              |                  |
| 59.                                 | Democratic Republic of Congo.tw or exp Democratic Republic of Congo |                  |
| 60.                                 | Djibout\$.tw or exp Djibouti/                                       |                  |
| 61.                                 | Egypt\$.tw or exp Egypt/                                            |                  |
| 62.                                 | Equatorial Guinea\$.tw or exp Equatorial Guinea/                    |                  |
| 63.                                 | Eritrea\$.tw or exp Eritrea/                                        |                  |
| 64.                                 | Ethiop\$.tw or exp Ethiopia/                                        |                  |
| 65.                                 | Gabon\$.tw or exp Gabon/                                            |                  |
| 66.                                 | Gambia\$.tw or exp Gambia/                                          |                  |
| 67.                                 | Ghana\$.tw or exp Ghana/                                            |                  |
| 68.                                 | Guinea\$.tw or exp Guinea/                                          |                  |
| 69.                                 | Guinea-Bissau.tw or exp Guinea-Bissau/                              |                  |

| Nr.                 | Searches (24th July 2017)                | Results |
|---------------------|------------------------------------------|---------|
| 70.                 | Kenya\$.tw or exp Kenya/                 |         |
| 71.                 | Lesoth\$.tw or exp Lesotho/              |         |
| 72.                 | Liberia\$.tw or exp Liberia/             |         |
| 73.                 | Libya\$.tw or exp Libya/                 |         |
| 74.                 | Madagascar\$.tw or exp Madagascar/       |         |
| 75.                 | Malawi\$.tw or exp Malawi/               |         |
| 76.                 | Mali.tw or exp Mali/                     |         |
| 77.                 | Mauritania\$.tw or exp Mauritania/       |         |
| 78.                 | Mauritius\$.tw or exp Mauritius/         |         |
| 79.                 | Morocc\$.tw or exp Morocco/              |         |
| 80.                 | Mozambique\$.tw or exp Mozambique/       |         |
| 81.                 | Namibia\$.tw or exp Namibia/             |         |
| 82.                 | Niger.tw or exp Niger/                   |         |
| 83.                 | Nigeria\$.tw or exp Nigeria/             |         |
| 84.                 | Rwanda\$.tw or exp Rwanda/               |         |
| 85.                 | (Sao Tome and Principe).tw               |         |
| 86.                 | Senegal\$.tw or exp Senegal/             |         |
| 87.                 | Seychell\$.tw                            |         |
| 88.                 | Sierra Leone.tw or exp Sierra Leone/     |         |
| 89.                 | Somalia\$.tw or exp Somalia/             |         |
| 90.                 | South Africa\$.tw or exp South Africa.de |         |
| 91.                 | South Sudan.tw or exp South Sudan/       |         |
| 92.                 | Sudan\$.tw or exp Sudan/                 |         |
| 93.                 | Swaziland\$.tw or exp Swaziland/         |         |
| 94.                 | Tanzania\$.tw or exp Tanzania/           |         |
| 95.                 | Togo\$.tw or exp Togo/                   |         |
| 96.                 | Tunisia\$.tw or exp Tunisia/             |         |
| 97.                 | Uganda\$.tw or exp Uganda/               |         |
| 98.                 | Zambia\$.tw or exp Zambia/               |         |
| 99.                 | Zimbabwe\$.tw or exp Zimbabwe/           |         |
| 100.                | Somaliland\$.tw or exp Somaliland/       |         |
| 101.                | #1.tw                                    |         |
| 102.                | or/45-101                                | 436 084 |
| 103.                | 44 and 102                               | 19 017  |
| <b>Study design</b> |                                          |         |
| 104.                | randomized controlled trial.pt.          |         |
| 105.                | controlled clinical trial.pt.            |         |

| Nr.  | Searches (24th July 2017)   | Results     |
|------|-----------------------------|-------------|
| 106. | randomized.ab.              |             |
| 107. | placebo.ab.                 |             |
| 108. | randomly.ab.                |             |
| 109. | trial.ab.                   |             |
| 110. | groups.ab.                  |             |
| 111. | or/104-110                  | 2 535 560   |
| 112. | exp animals/ not humans.sh. |             |
| 113. | 111 not 112                 | 2 133 129   |
| 114. | 103 and 113                 | <b>2643</b> |

#### Medline (Ovid): Update on hypertension

| Nr.                                 | Searches (23th June 2020)                                           | Results |
|-------------------------------------|---------------------------------------------------------------------|---------|
| <b>Indication</b>                   |                                                                     |         |
| 1.                                  | Exp hypertension                                                    |         |
| 2.                                  | Hypertens\$.ti,ab                                                   |         |
| 3.                                  | (high adj2 blood pressure).ti,ab                                    |         |
| 4.                                  | (blood pressure control).ti,ab                                      |         |
| 5.                                  | or/1-4                                                              | 464 555 |
| <b>Africa and African countries</b> |                                                                     |         |
| 6.                                  | Africa.tw                                                           |         |
| 7.                                  | Exp Africa/                                                         |         |
| 8.                                  | Algeria\$.tw or exp Algeria/                                        |         |
| 9.                                  | Angol\$.tw or exp Angola/                                           |         |
| 10.                                 | Benin\$.tw or exp Benin/                                            |         |
| 11.                                 | Botswan\$.tw or exp Botswana/                                       |         |
| 12.                                 | Burkina Faso.tw or exp Burkina Faso/                                |         |
| 13.                                 | Burund\$.tw or exp Burundi/                                         |         |
| 14.                                 | Cameroon\$.tw or exp Cameroon/                                      |         |
| 15.                                 | Cape Verde.tw or exp Cape Verde/                                    |         |
| 16.                                 | Central African Republic\$.tw or exp Central African Republic/      |         |
| 17.                                 | Chad\$.tw or exp Chad/                                              |         |
| 18.                                 | Comoros\$.tw or exp Comoros/                                        |         |
| 19.                                 | Cote d'Ivoire.tw or exp Cote d'Ivoire/                              |         |
| 20.                                 | Democratic Republic of Congo.tw or exp Democratic Republic of Congo |         |
| 21.                                 | Djibout\$.tw or exp Djibouti/                                       |         |

| Nr. | Searches (23th June 2020)                        | Results |
|-----|--------------------------------------------------|---------|
| 22. | Egypt\$.tw or exp Egypt/                         |         |
| 23. | Equatorial Guinea\$.tw or exp Equatorial Guinea/ |         |
| 24. | Eritrea\$.tw or exp Eritrea/                     |         |
| 25. | Ethiop\$.tw or exp Ethiopia/                     |         |
| 26. | Gabon\$.tw or exp Gabon/                         |         |
| 27. | Gambia\$.tw or exp Gambia/                       |         |
| 28. | Ghana\$.tw or exp Ghana/                         |         |
| 29. | Guinea\$.tw or exp Guinea/                       |         |
| 30. | Guinea-Bissau.tw or exp Guinea-Bissau/           |         |
| 31. | Kenya\$.tw or exp Kenya/                         |         |
| 32. | Lesoth\$.tw or exp Lesotho/                      |         |
| 33. | Liberia\$.tw or exp Liberia/                     |         |
| 34. | Libya\$.tw or exp Libya/                         |         |
| 35. | Madagascar\$.tw or exp Madagascar/               |         |
| 36. | Malawi\$.tw or exp Malawi/                       |         |
| 37. | Mali.tw or exp Mali/                             |         |
| 38. | Mauritania\$.tw or exp Mauritania/               |         |
| 39. | Mauritius\$.tw or exp Mauritius/                 |         |
| 40. | Morocc\$.tw or exp Morocco/                      |         |
| 41. | Mozambique\$.tw or exp Mozambique/               |         |
| 42. | Namibia\$.tw or exp Namibia/                     |         |
| 43. | Niger.tw or exp Niger/                           |         |
| 44. | Nigeria\$.tw or exp Nigeria/                     |         |
| 45. | Rwanda\$.tw or exp Rwanda/                       |         |
| 46. | (Sao Tome and Principe).tw                       |         |
| 47. | Senegal\$.tw or exp Senegal/                     |         |
| 48. | Seychell\$.tw                                    |         |
| 49. | Sierra Leone.tw or exp Sierra Leone/             |         |
| 50. | Somalia\$.tw or exp Somalia/                     |         |
| 51. | South Africa\$.tw or exp South Africa.de         |         |
| 52. | South Sudan.tw or exp South Sudan/               |         |
| 53. | Sudan\$.tw or exp Sudan/                         |         |
| 54. | Swaziland\$.tw or exp Swaziland/                 |         |
| 55. | Tanzania\$.tw or exp Tanzania/                   |         |
| 56. | Togo\$.tw or exp Togo/                           |         |
| 57. | Tunisia\$.tw or exp Tunisia/                     |         |
| 58. | Uganda\$.tw or exp Uganda/                       |         |

| Nr.                 | Searches (23th June 2020)                    | Results    |
|---------------------|----------------------------------------------|------------|
| 59.                 | Zambia\$.tw or exp Zambia/                   |            |
| 60.                 | Zimbabwe\$.tw or exp Zimbabwe/               |            |
| 61.                 | Somaliland\$.tw or exp Somaliland/           |            |
| 62.                 | Sahrawi Arab Democratic Republic.tw.         |            |
| 63.                 | or/6-62                                      | 530 370    |
| <b>Study design</b> |                                              |            |
| 64.                 | randomized controlled trial.pt.              |            |
| 65.                 | controlled clinical trial.pt.                |            |
| 66.                 | (randomized or randomised or randomly).ti,ab |            |
| 67.                 | placebo.ab.                                  |            |
| 68.                 | trial.ab.                                    |            |
| 69.                 | groups.ab.                                   |            |
| 70.                 | or/64-69                                     | 2 757 989  |
| 71.                 | 5 and 63 and 70                              | 3036       |
| 72.                 | exp animals/ not humans.sh.                  |            |
| 73.                 | 71 not 72                                    |            |
| 74.                 | 73 not (comment or editorial).pt             | 2964       |
| 75.                 | Limit 74 to yr= "2017-Current"               | <b>538</b> |

**CENTRAL: Search on CVDs**

| Nr. | Searches (14th August 2017)                                                                                                | Results     |
|-----|----------------------------------------------------------------------------------------------------------------------------|-------------|
| 1   | Africa, explode all trees                                                                                                  |             |
| 2   | Algeria* or Angol* or Benin* or Botswan*                                                                                   |             |
| 3   | (Burkina Faso) or Burund* or Cameroon* or (Cape Verde) or (Central African Republic)                                       |             |
| 4   | Chad* or Comoros* or Cote d'Ivoire or Congo*                                                                               |             |
| 5   | Djibout* or Egypt* or (Equatorial Guinea*) or Eritrea*                                                                     |             |
| 6   | Ethiop* or Gabon* or Gambia* or Ghana* or Guinea* or Guinea-Bissau                                                         |             |
| 7   | Kenya* or Lesoth* or Liberia* or Libya* or Madagascar* or Malawi*                                                          |             |
| 8   | Mali* or Mauritania* or Mauritius* or Morocc* or Mozambique* or Namibia* or Niger*                                         |             |
| 9   | Nigeria* or Rwanda* or (Sao Tome and Principe) or Senegal* or Seychell*                                                    |             |
| 10  | Sierra Leone or Somalia* or (South Africa) or (South Sudan*) or Sudan* or Swasiland                                        |             |
| 11  | Tanzania* or Togo* or Tunisia* or Uganda* or Zambia* or Zimbabwe* or Somaliland or (Sahrawi Arab Democratic Republic)      |             |
| 12  | #1 or #2 or #3 or #4 or #5 or #6 or #7 or #8 or #9 or #10 or #11                                                           | 39 610      |
| 13  | MeSH descriptor Cardiovascular Diseases, this term only                                                                    |             |
| 14  | MeSH descriptor Heart Diseases explode all trees                                                                           |             |
| 15  | MeSH descriptor Vascular Diseases explode all trees                                                                        |             |
| 16  | MeSH descriptor Cerebrovascular Disorders, this term only                                                                  |             |
| 17  | MeSH descriptor Brain Ischemia explode all trees                                                                           |             |
| 18  | MeSH descriptor Carotid Artery Diseases explode all trees                                                                  |             |
| 19  | MeSH descriptor Dementia, Vascular explode all trees                                                                       |             |
| 20  | MeSH descriptor Intracranial Arterial Diseases explode all trees                                                           |             |
| 21  | MeSH descriptor Intracranial Embolism and Thrombosis explode all trees                                                     |             |
| 22  | MeSH descriptor Intracranial Hemorrhages explode all trees                                                                 |             |
| 23  | MeSH descriptor Stroke explode all trees                                                                                   |             |
| 24  | MeSH descriptor Hyperlipidemias explode all trees (4197)                                                                   |             |
| 25  | (coronar* or heart or peripheral* or cerebrovascular* or myocardial) near 3 (disease or infarct*)                          |             |
| 26  | myocardi* near 3 (infarct* or revascular* or ischaem* or ischem*)                                                          |             |
| 27  | vascular* near 3 (peripheral* or disease* or complication*)                                                                |             |
| 28  | hypertensi* or (high near 2 blood pressure)                                                                                |             |
| 29  | (heart near 2 failure) or stroke                                                                                           |             |
| 30  | Endocarditis or myocarditis or Cardiomegaly or arrythmi*                                                                   |             |
| 31  | #13 or #14 or #15 or #16 or #17 or #18 or #19 or #20 or #21 or #22 or #23 or #24 or #25 or #26 or #27 or #28 or #29 or #30 | 101 472     |
| 32  | #12 and #31                                                                                                                | 4139        |
| 32  | Trials                                                                                                                     | <b>2008</b> |

**CENTRAL, Update on hypertension**

| Nr. | Searches (23th June 2020)                                                            | Results |
|-----|--------------------------------------------------------------------------------------|---------|
| 1   | Africa, explode all trees                                                            |         |
| 2   | Algeria* or Angol* or Benin* or Botswan*                                             |         |
| 3   | (Burkina Faso) or Burund* or Cameroon* or (Cape Verde) or (Central African Republic) |         |
| 4   | Chad* or Comoros* or Cote d'Ivoire or Congo*                                         |         |
| 5   | Djibout* or Egypt* or (Equatorial Guinea*) or Eritrea*                               |         |
| 6   | Ethiop* or Gabon* or Gambia* or Ghana* or Guinea* or Guinea-Bissau                   |         |
| 7   | Kenya* or Lesoth* or Liberia* or Libya* or Madagascar* or Malawi*                    |         |
| 8   | Mali* or Mauritania* or Mauritius* or Morocc* or Mozambique* or Namibia* or Niger*   |         |
| 9   | Nigeria* or Rwanda* or (Sao Tome and Principe) or Senegal* or Seychell*              |         |

| Nr. | Searches (23th June 2020)                                                                                             | Results    |
|-----|-----------------------------------------------------------------------------------------------------------------------|------------|
| 10  | Sierra Leone or Somalia* or (South Africa) or (South Sudan*) or Sudan* or Swasiland                                   |            |
| 11  | Tanzania* or Togo* or Tunisia* or Uganda* or Zambia* or Zimbabwe* or Somaliland or (Sahrawi Arab Democratic Republic) |            |
| 12  | #1 or #2 or #3 or #4 or #5 or #6 or #7 or #8 or #9 or #10 or #11                                                      | 60 623     |
| 13  | MeSH descriptor: [Hypertension] explode all trees                                                                     |            |
| 14  | hypertensi* or (high near 2 blood pressure)                                                                           |            |
| 15  | #13 or #14                                                                                                            | 67 954     |
| 16  | #12 and #15                                                                                                           | 2929       |
|     | Trials, 2017-Current                                                                                                  | <b>333</b> |

### CINAHL, Search on 23.06.2020

(Africa\$ or Africa\$ or Algeria\$ or Angol\$ or Benin\$ or Botswan\$ or (Burkina Faso) or Burund\$ or Cameroon\$ or (Cape Verde) or (Central African Republic) or Chad\$ or Comoros\$ or Cote d'Ivoire or Congo\$ Djibout\$ or Egypt\$ or (Equatorial Guinea\$) or Eritrea\$ or Ethiop\$ or Gabon\$ or Gambia\$ or Ghana\$ or Guinea\$ or Guinea-Bissau or Kenya\$ or Lesoth\$ or Liberia\$ or Libya\$ or Madagascar\$ or Malawi\$ or Mali\$ or Mauritania\$ or Mauritius\$ or Morocc\$ or Mozambique\$ or Namibia\$ or Niger\$ or Nigeria\$ or Rwanda\$ or (Sao Tome and Principe) or Senegal\$ or Seychell\$ or Sierra Leone or Somalia\$ or (South Africa) or (South Sudan\$) or Sudan\$ or Swasiland or Tanzania\$ or Togo\$ or Tunisia\$ or Uganda\$ or Zambia\$ or Zimbabwe\$ or Somaliland or (Sahrawi Arab Democratic Republic)) in Abstract

AND

hypertension or high blood pressure or elevated blood pressure or htn or hypertensive in Abstract

AND

randomized or rct or randomised in Abstract

AND

In English

AND

Peer-reviewed

And

Humans

**Total: 42 results**

### International Clinical Trials Registry Platform (<http://apps.who.int/trialsearch/AdvSearch.aspx>), Search on 22 October 2019

hypertension or (blood pressure control) or (high blood pressure) in the condition,

**Recruitment status: all**

**Countries of recruitment:**

- Africa or African in the title: 90 trials
- Algeria or Angola or Behin or Burkina Faso or Botswana or Burundi or Cameroon or Central Africa Republic or Chad or Congo or Cabo Verde or Cite D'Ivoire: 13 trials
- Democratic Republic of Congo or Djibouti or Egypt or Equatorial Guinea or Eritrea or Ethiopia or Gabon or Gambia or Ghana or Guinea or Guinea-Bissau or Kenya: 78 trials
- Lesotho or Liberia or Libya or Madagascar or Malawi or Mali or Mauritius or Morocco or Mozambique: 14 trials
- Namibia or Niger or Nigeria or Rwanda or Sao Tome and Principe or Senegal or Seychelles or Sierra Leone or Somalia or Sudan or South Sudan or Swaziland: 23 trials
- Togo or Tunezia or United Republic of Tanzania or Uganda or Zambia or Zimbabwe: 25 trials

**Total: 18 results**
