# Supplementary material for: Non-pharmacological interventions to achieve blood pressure control in African patients: a systematic review
Source: PubMed Central journal article supplement — BMJ Open. 2022 Feb 28;12(2):e048079. doi: 10.1136/bmjopen-2020-048079 (PMC8886440; doi:10.1136/bmjopen-2020-048079), 2022-02-28
Supplement: bmjopen-2020-048079supp002.pdf [file bmjopen-2020-048079supp002.pdf]

**Heart failure (N=13)**

1. Adigun AQ, Ajayi OE, Sofowora GG, Ajayi AA (1998) Vasodilator therapy of hypertensive acute left ventricular failure: comparison of captopril-prazosin with hydralazine-isosorbide dinitrate. *International Journal of Cardiology*, 67(1):81-6.
2. Ajayi AA, Balogun MO, Oyewo EA, Ladipo GO (1989) Enalapril in African patients with congestive cardiac failure. *British Journal of Clinical Pharmacology*, 27(3):400-3.
3. Ajayi AA, Sofowora GG, Adigun AQ, Asiyabola B (2003) Adjunctive sympathoplegic therapy to ACE inhibition in Blacks with congestive heart failure: a comparison of alpha-1 with beta-1 blockade on exercise tolerance and cardiac sympathovagal reflex activity. *Ethnicity & Disease*, 13(1):71-9.
4. Ajiboye OA, Anigbogu CN, Ajuluchukwu JN, Jaja SI (2013) Therapeutic Effects of Exercise Training On Selected Cardio-Pulmonary Parameters and Body Composition of Nigerians with Chronic Heart Failure (A Preliminary Study). *Nigerian Quarterly Journal of Hospital Medicine*, 23(4):295-301.
5. Ajiboye OA, Anigbogu CN, Ajuluchukwu JN, Jaja SI (2015) Exercise training improves functional walking capacity and activity level of Nigerians with chronic biventricular heart failure. *Hong Kong Physiotherapy Journal* 33(1): 42-9.
6. Ibrahim MH, Elmahdy MA (2014) Improvement of exercise performance and ventilator efficiency in patients with chronic heart failure after sildenafil use for 8 weeks. *Egyptian Journal of Chest Diseases and Tuberculosis* 63(2): 477-81.
7. Mahgoub AA, El-Medany AH, Abdulatif AS (2002) A comparison between the effects of diltiazem and isosorbide dinitrate on digoxin pharmacodynamics and kinetics in the treatment of patients with chronic ischemic heart failure. *Saudi Medical Journal*, 23(6):725-31.
8. Mansour S, Youssef A, Rayan M, Ayman Saleh M (2011) Efficacy of ivabradine in idiopathic dilated cardiomyopathy patients with chronic heart failure. *Egyptian Heart Journal*63(2):79-85.
9. Marcus RH, Raw K, Patel J, Mitha A, Sareli P (1990) Comparison of intravenous amrinone and dobutamine in congestive heart failure due to idiopathic dilated cardiomyopathy. *American journal of cardiology* 66(15):1107-12.
10. Noura S, Boukef R, Bouida W, Kerkeni W, Beltaief K, Boubaker H, et al. (2011) Noninvasive pressure support ventilation and CPAP in cardiogenic pulmonary edema: a multicenter randomized study in the emergency department. *Intensive care medicine*, 37(2):249-56.
11. Sliwa K, Damasceno A, Davison BA, Mayosi BM, Sani MU, Ogah O, et al. (2016) Bitreatment with hydralazine/nitrates vs. placebo in Africans admitted with acute Heart Failure (BA-HEF). *European Journal of Heart Failure*, 18(10):1248-58.
12. Sliwa K, Norton GR, Kone N, Candy G, Kachope J, Woodiwiss AJ, et al. (2004) Impact of initiating carvedilol before angiotensin-converting enzyme inhibitor therapy on cardiac function in newly diagnosed heart failure. *Journal of the American College of Cardiology*, 44(9):1825-30.
13. Wisenbaugh T, Katz I, Davis J, Essop R, Skoularigis J, Middlemost S, et al. (1993) Longterm (3-month) effects of a new beta-blocker (nebivolol) on cardiac performance in dilated cardiomyopathy. *Journal of the American College of Cardiology*, 21(5):1094-100.

**Coronary heart disease (N=7)**

1. Adel M, Mansour S, Sabri NA, Badary OA, Ayman Saleh M (2016) A clinical study evaluating the effect of ivabradine on inflammation in patients with non ST-segment elevation acute coronary syndromes. *International Journal of Pharmaceutical Sciences and Research*, 7(4):1441-9.

2. Ahmed RM, Mohamed el HA, Ashraf M, Maithili S, Nabil F, Rami R, et al. (2013) Effect of remote ischemic preconditioning on serum troponin T level following elective percutaneous coronary intervention. *Catheterization & Cardiovascular Interventions*, 82(5):E647-53.
3. Coetzee A, Roussouw G, Macgregor L (1996) Failure of allopurinol to improve left ventricular stroke work after cardiopulmonary bypass surgery. *Journal of cardiothoracic and vascular anesthesia*, 10(5):627-33.
4. Hamza MA, Galal A, Suweilam S, Ismail M (2014) Local intracoronary eptifibatide versus mechanical aspiration in patients with acute ST-elevation myocardial infarction. *International journal of vascular medicine*. Available from: <http://onlinelibrary.wiley.com/doi/10.1111/ijvm.12189>
5. Harilall Y, Adam JK, Biccand BM, Reddi A (2014) The effect of optimising cerebral tissue oxygen saturation on markers of neurological injury during coronary artery bypass graft surgery. *Heart, Lung & Circulation*, 23(1):68-74.
6. Nassar YS, Laimud M, Afify M, Shawky MA (2014) Platelet aggregation inhibition by Eptifibatide versus high dose Tirofiban during primary percutaneous interventions. *Egyptian Heart Journal*, 66(3): 241-50.
7. Shehata M, Fayez G, Nassar A (2015) Intensive Statin Therapy in NSTEMI-ACS Patients Undergoing PCI: Clinical and Biochemical Effects. *Texas Heart Institute Journal*, 42(6):528-36.

#### **Pharmacotherapy for hypertension (N=76)**

1. Abengowe CU (1985) A double-blind comparison of acebutolol (Sectral) and propranolol (Inderal) in the treatment of hypertension in black Nigerian patients. *Journal of International Medical Research*. 13(2):116-21
2. Abson CP, Levy LM, Eyherabide G (1981) Once-daily atenolol in hypertensive Zimbabwean blacks. A double-blind trial using two different doses. *South African Medical Journal Suid-Afrikaanse Tydskrif Vir Geneeskunde* 60(2):47-8.
3. Ahaneku JE, Agbedana OE, Taylor OG (1995) Relationship between body mass index (BMI) and changes in plasma total and HDL-cholesterol levels during treatment of hypertension in African patients. *Acta Medica Okayama*. 49(5):267.
4. Ajayi AA, Oyewo EA, Ladipo GO, Akinsola A (1989) Enalapril and hydrochlorothiazide in hypertensive Africans. *European Journal of Clinical Pharmacology*. 36(3):229-34.
5. Ajayi AA, Akintomide AO (1995) The efficacy and tolerability of amlodipine and hydrochlorothiazide in Nigerians with essential hypertension. *Journal of the National Medical Association*. 87(7):485-8.
6. Bosman AR, Goldberg B, McKechnie JK, Offermeier J, Oosthuizen OJ (1977) South African multicentre study of metoprolol and propranolol in essential hypertension. *South African Medical Journal Suid-Afrikaanse Tydskrif Vir Geneeskunde*. 51(3):57-61.
7. Cilliers AJ (1979) Atenolol as primary therapy in previously untreated hypertensives and as an adjuvant to other therapy. A South African Multicentre Study. *South African Medical Journal Suid-Afrikaanse Tydskrif Vir Geneeskunde*. 55(9):321-4.
8. Daniels AR, Opie LH (1987) Monotherapy with the calcium channel antagonist nisoldipine for systemic hypertension and comparison with diuretic drugs. *American journal of cardiology* 60(8): 703-7.

9. Dean G, Louw S, Hersch C, Kirsten HO, Brereton DN, Finnemore L, et al. (1971) A double-blind trial in hypertension comparing Baycaron (FBA 1500), hydrochlorothiazide and placebo. *South African Medical Journal Suid-Afrikaanse Tydskrif Vir Geneeskunde*. 45(12):323.
10. Djoumessi RN, Noubiap JJ, Kaze FF, et al. (2016) Effect of low-dose spironolactone on resistant hypertension in type 2 diabetes mellitus: a randomized controlled trial in a sub-Saharan African population. *BMC Res Notes*. 9:187.
11. Fadayomi MO, Akinroye KK, Ajao RO, Awosika LA (1986) Monotherapy with nifedipine for essential hypertension in adult blacks. *Journal of Cardiovascular Pharmacology*. 8(3):466-9.
12. Farag, SM, Rabea HM, Mahmoud HB (2018) Effect of Amlodipine/Valsartan Versus Nebivolol/Valsartan Fixed Dose Combinations on Peripheral and Central Blood Pressure. *High Blood Pressure & Cardiovascular Prevention*. 25:407-13.
13. Goodman C, Rosendorff C, Coull A (1985) Comparison of the antihypertensive effect of enalapril and propranolol in black South Africans. *South African Medical Journal Suid-Afrikaanse Tydskrif Vir Geneeskunde*. 67(17):672-6.
14. Habte B (1992) The efficacy of hydrochlorothiazide, timolol and enalapril in Ethiopians with essential hypertension. *Ethiop Med J* 30: 163–7.
15. Isles CG, Johnson AO, Milne FJ (1986) Slow release nifedipine and atenolol as initial treatment in blacks with malignant hypertension. *British journal of clinical pharmacology* 21(4): 377-83.
16. Iyalomhe GB, Omogbai EK, Isah AO, Iyalomhe OO, Dada FL, Iyalomhe SI (2013) Efficacy of initiating therapy with amlodipine and hydrochlorothiazide or their combination in hypertensive Nigerians. *Clinical & Experimental Hypertension* 35(8):620-7.
17. Iyalomhe GBSOEKIIOOBISI. (2013) Long-term effects of amlodipine and hydrochlorothiazide combination therapy on creatinine clearance in hypertensive Nigerians. *Global journal of pharmacology*. 7(1): 45-51.
18. Iyalomhe GBS, Omogbai EKI, Ozolua RI (2007) Antihypertensive and some biochemical effects of hydrochlorothiazide and furosemide in some Nigerians. *Journal of medical sciences (Taipei, Taiwan)* 7(6): 977-83.
19. Iyalomhe GBS, Omogbai EKI, Ozolua RI, Iyalomhe OOB (2008) Effects of hydrochlorothiazide and furosemide on creatinine clearance in some hypertensive Nigerians. *African journal of biotechnology* 7 (7): 848-51.
20. Leary WP, Maharaj B (1990) Comparison of felodipine and hydrochlorothiazide for the treatment of mild to moderate hypertension in black Africans. *Journal of Cardiovascular Pharmacology*. 15 Suppl 4:S91-3.
21. Leary WP, Reyes AJ, Byl K, Maharaj B (1987) Comparative antihypertensive effects of ketanserin and a ketanserin-hydrochlorothiazide combination administered once daily. *Journal of cardiovascular pharmacology* 10 Suppl 3: 127-34.
22. Leary WP, Reyes AJ, Maharaj B, Byl K (1991) Time course of the blood pressure response to oral isradipine in uncomplicated mild-to-moderate essential hypertension. *American journal of hypertension* 4(2 Pt 2): 147-50.
23. Levenstein JH (1978) Oxprenolol slow-release with cyclopentiazide-KCl compared with methyl dopa in the treatment of essential hypertension. A multicentre general practice trial. *South African Medical Journal Suid-Afrikaanse Tydskrif Vir Geneeskunde*. 54(21):860-4.

24. Lubbe WF (1974) Clonidine in the management of uncontrolled hypertension. *South African medical journal* 48(10): 391-6.
25. Mabadeje AFB (1977) Controlled clinical trial between oxprenolol and methyldopa in hypertensive Nigerians. *Current therapeutic research - clinical and experimental* 22(3): 391-7.
26. Mabadeje AF, Adebayo GI (1989) Comparative effects of labetalol and bromazepam on ambulatory blood pressure of Nigerians with labile and stress hypertension. *Clinical & Experimental Hypertension - Part A, Theory & Practice*. 11 Suppl 1:441-7.
27. Maharaj B, Byl K (1992) A comparison of the acute hypotensive effects of two different doses of nifedipine. *American heart journal* 124(3): 720-5.
28. Maharaj B, Byl K (1993) Randomised double-blind comparative study of efficacy and safety of hydroflumethiazide and reserpine and chlortalidone and atenolol in the treatment of mild to moderate hypertension in black patients. *Journal of human hypertension* 7(5): 447-50.
29. Maharaj B, Byl K (1993) A comparative study of isradipine SRO and enalapril in black patients with mild-to-moderate hypertension. *American journal of hypertension* 6(3 Pt 2): 80-1.
30. Mangoush M, Singh NK, Kumar S, Basha A, Gupta BS, Bolya YK, et al. (1990) Efficacy of enalapril in essential hypertension and its comparison with atenolol. *Postgraduate medical journal* 66 (776): 446-9.
31. Manyemba J (1997) A randomised crossover comparison of reserpine and sustained-release nifedipine in hypertension. *Central African Journal of Medicine*. 43(12):344-9.
32. M'Buyamba-Kabangu JR, Anisiuba BC, Ndiaye MB, Lemogoum D, Jacobs L, Ijoma CK, et al. (2013) Efficacy of newer versus older antihypertensive drugs in black patients living in sub-Saharan Africa. *Journal of Human Hypertension*. 27(12):729-35.
33. Osakwe CE, Jacobs L, Anisiuba BC, Ndiaye MB, Lemogoum D, Ijoma CK, et al. (2014) Heart rate variability on antihypertensive drugs in black patients living in sub-Saharan Africa. *Blood Pressure*, 23(3):174-80.
34. M'Buyamba-Kabangu JR, Lepira B, Lijnen P, Tshiani K, Fagard R, Amery A (1988) Intracellular sodium and the response to nitrendipine or atenolol in African blacks. *Hypertension*. 11(1):100-5
35. Mengesha HG, Welegerima AH, Hadgu A, Temesgen H, Otieno MG, Tsegay K, Fisseha T, Getachew S, Merha Z, Tewodros H, Dabessa J, Gebreegzabher B, Petrucka P (2018) Comparative effectiveness of antihypertensive drugs prescribed in Ethiopian healthcare practice: A pilot prospective, randomized, open label study. *PLoS ONE* 13(9): e0203166. <https://doi.org/10.1371/journal.pone.0203166>.
36. Middlemost SJ, Tager R, Davis J, Sareli P (1994) Effectiveness of enalapril in combination with low-dose hydrochlorothiazide versus enalapril alone for mild to moderate systemic hypertension in black patients. *American journal of cardiology* 73(15):1092-7.
37. Mngola EN (1980) The use of a spironolactone and althiazide combination (aldactacine) in the treatment of benign essential hypertension. *Journal of International Medical Research*. 8(3):199-204.
38. Norton GR, Woodiwiss AJ, Hartford C, Trifunovic B, Middlemost S, Lee A, et al. (1999) Sustained antihypertensive actions of a dual angiotensin-converting enzyme neutral endopeptidase inhibitor, sampatrilat, in black hypertensive subjects. *American journal of hypertension* 12(6): 563-71.
40. Nwachukwu DC, Aneke E, Nwachukwu NZ, Obika LF, Nwagha UI, Eze AA (2015) Effect of Hibiscus sabdariffa on blood pressure and electrolyte profile of mild to moderate hypertensive Nigerians: A comparative study with hydrochlorothiazide. *Nigerian Journal of Clinical Practice*. 18(6):762-70.

41. Nwachukwu DC, Aneke EI, Nwachukwu NZ, Azubike N, Obika LF (2017) Does consumption of an aqueous extract of *Hibiscus sabdariffa* affect renal function in subjects with mild to moderate hypertension? *Journal of Physiological Sciences: JPS*, 67(1):227-34.
42. Nwachukwu DC, Aneke EI, Obika LF, Nwachukwu NZ (2015) Effects of aqueous extract of *Hibiscus sabdariffa* on the renin-angiotensin-aldosterone system of Nigerians with mild to moderate essential hypertension: A comparative study with lisinopril. *Indian Journal of Pharmacology*, 47(5):540-5.
43. Nwachukwu DC, Eze AA, Nwachukwu NZ, Aneke EI, Agu PU, Azubike NC, et al.(2017) Monotherapy with amlodipine or hydrochlorothiazide in patients with mild to moderate hypertension: Comparison of their efficacy and effects on electrolytes, *Malawi Medical Journal* 29 (2): 108-112.
44. Obel AO, Gitau W (1981) Comparison of the antihypertensive effect of metipranolol, butizide and torrat in Kenyan Africans. *East African Medical Journal*. 58(11):867-71.
45. Obel AO (1983) A comparison of timolol plus hydrochlorothiazide plus amiloride and methyldopa in essential hypertension in Black Africans. *Tropical & Geographical Medicine*. 35(3):285-91.
46. Obel A, Griffin L, Were J (1984) Comparison of slow-release frusemide (Lasix Retard) and bendrofluazide in the treatment of moderate hypertension in Kenyan negroes. *Clinical trials* 1(6): 443-50.
47. Obel AO (1989) Placebo-controlled trial of potassium supplements in black patients with mild essential hypertension. *Journal of cardiovascular pharmacology* 14(2): 294-6.
48. Obel AO (1989) Effects of chlorthalidone, oxprenolol, and their combination in hypertensive blacks: a randomized double-blind crossover study. *Journal of cardiovascular pharmacology* 13(3): 465-70.
49. Obel AO (1990) Efficacy and tolerability of long term oxprenolol and chlorthalidone singly and in combination in hypertensive blacks. *Japanese heart journal* 31(2): 183-92.
50. Obel AO, Koech DK. (1991) Potassium supplementation versus bendrofluazide in mildly to moderately hypertensive Kenyans. *Journal of Cardiovascular Pharmacology*. 17(3):504-7.
51. Ogola EN, Yonga GO (1993) Comparative study of the efficacy and tolerability of hydroflumethiazide versus propranolol in Africans with mild to moderate hypertension. *East African Medical Journal*. 70(5):277-9.
52. Ojii DB, Mayosi B, Francis V, Badri M, Cornelius V, Poulter N et al. (2019) Comparison of Dual Therapies for Lowering Blood Pressure in Black Africans. *The New England Journal of Medicine* 380:2429-2439.
53. Okeahialam BN, Ohihoin EN, Ajuluchukwu JN (2012) Diuretic drugs benefit patients with hypertension more with night-time dosing. *Therapeutic Advances in Drug Safety*, 3(6):273-8.
54. Onwubere BJ, Obodo JO, Oke DA, Okeahialam BN, Danbauchi SS, Mbakwem AC (2001) A randomised trial to compare the efficacy and safety of Felodipine (Plendil) and Nifedipine (Adalat) retard in patients with mild-to-moderate hypertension. *West African Journal of Medicine*. 20(4):196-202.
55. Opie LH, Müller FO, Myburgh DP, Rosendorff C, Sareli P, Seedat YK, et al. (1997) Efficacy and tolerability of nisoldipine coat-core formulation in the treatment of essential hypertension: the South African Multicenter ANCHOR Study. *Ambulatory Nisoldipine Coat-Core Hypertension Outpatient Response (ANCHOR) Investigators. American journal of hypertension* 10(3): 250-60.

56. Opie LH, Haus M, Commerford PJ, Levetan B, Moore K, Brink J (2002) Antihypertensive effects of angiotensin converting enzyme inhibition by lisinopril in post-transplant patients. *American journal of hypertension* 15(10 Pt 1): 911-6.
57. Poulter NR, Sanderson JE, Thompson AV, Sever PS, Chang CL (1993) Comparison of nifedipine and propranolol as second line agent for hypertension in black Kenyans. *BMJ* 306(6878): 621-2.
58. Radevski I, Skudicky D, Candy G, Sathekge S, Strugo V, Sareli P (1999) Antihypertensive monotherapy with nisoldipine CC is superior to enalapril in black patients with severe hypertension. *American Journal of Hypertension*. 12(2 Pt 1):194-203.
59. Radevski IV, Valtchanova ZP, Candy GP, Wald AM, Ngcezula T, Sareli P (2002). Comparison of indapamide and low-dose hydrochlorothiazide monotherapy in black patients with mild to moderate hypertension. *South African Medical Journal Suid-Afrikaanse Tydskrif Vir Geneeskunde*. 92(7):532-6.
60. Rogers, GG, Rosendorff C, Goodman C, Radford HM (1988) Effects of angiotensin converting enzyme inhibition and beta-blockade on exercise responses in hypertensive patients: *Journal of Hypertension*, 6 (4): 662–S665.
61. Salako LA, Falase AO, Aderounmu AF (1979) Placebo-controlled, double-blind clinical trial of alprenolol in African hypertensive patients. *Current Medical Research & Opinion*. 6(5):358-63.
62. Salako LA, Falase AO, Aderounmu AF (1979) Comparative beta-adrenoreceptor-blocking effects and pharmacokinetics of propranolol and pindolol in hypertensive Africans. *Clinical Science*. 57 Suppl 5:393-6.
63. Salako LA, Falase AO, Aderounmu AF, Walker O (1990) Assessment of a fixed-dosage combination of atenolol and chlorthalidone (Tenoretic) in hypertensive Nigerians. *African Journal of Medicine & Medical Sciences*. 19(1):57-61.
64. Salako BL, Kadiri S, Walker O, Fehintola FA (1998) Evaluation of lacidipine (a calcium blocker) in the treatment of hypertension in black African people: a double-blind comparison with hydrochlorothiazide. *African Journal of Medicine & Medical Sciences*. 27(1-2):73-5
65. Sareli P, Radevski IV, Valtchanova ZP, Libhaber E, Candy GP, Den Hond E, et al. (2001) Efficacy of different drug classes used to initiate antihypertensive treatment in black subjects: results of a randomized trial in Johannesburg, South Africa. *Archives of Internal Medicine*. 161(7):965-71.
66. Seedat YK (1980) Trial of atenolol and chlorthalidone for hypertension in black South Africans. *British Medical Journal*. 281(6250):1241-3.
67. Seedat YK, Parag KB (1987) A comparison of lisinopril and atenolol in black and Indian patients with mild-to-moderate essential hypertension. *South African Medical Journal Suid-Afrikaanse Tydskrif Vir Geneeskunde*. 71(3):149-53.
68. Seedat YK, Parag KB, Nathoo BC (1990) Nitrendipine in a fixed stepped-dose study compared with methyldopa in black and Indian hypertensive patients. *Current therapeutic research - clinical and experimental* 48(1): 10-9.
69. Skoularigis J, Eitzman L, Davis J, Strugo V, Sareli P (1994) Nifedipine versus captopril in the management of moderate hypertension in black patients. *American journal of hypertension* 7(5): 440-7.
70. Skoularigis J, Strugo V, Zambakides C, Eintracht S, Reddy K, Tshele E, et al. (1996) Comparison of captopril-thiazide and enalapril-thiazide combinations in the management of mild to moderate black hypertensive patients: how important is diuretic dose and duration of action of the ACE-inhibitor? *International journal of clinical pharmacology and therapeutics* 34(6): 263-8.

71. Sobngwi E, Mfeukeu-Kuate L, Kouam M, Tankeu AT, Nganou-Gnindjio CN, Hamadou B, et al. (2019) Short-term effects of perindopril-amlodipine vs perindopril-indapamide on blood pressure control in sub-Saharan type 2 diabetic individuals newly diagnosed for hypertension: A double-blinded randomized controlled trial, *Journal of Clinical Hypertension*. 21:1002-9.
72. Stein CM, Neill P, Kusemamuriwo T (1992) Antihypertensive effects of low doses of hydrochlorothiazide in hypertensive black Zimbabweans. *International Journal of Cardiology*. 37(2):231-5.
73. Venter CP, Joubert PH, Booyens J (1988) Effects of essential fatty acids on mild to moderate essential hypertension. *Prostaglandins, leukotrienes, and essential fatty acids* 33(1): 49-51.
74. Venter CP, Venter HL, Muntingh GL (1991) The effect of enalapril and prazosin on mild to moderate hypertension in black Africans. Results of a clinical trial. *South African medical journal* 80(7): 324-6.
75. Wadhawan DN (1981) Antihypertensive therapy with diuretics without potassium supplement. *Medical journal of zambia* 16(1): 4-6.
76. Wahab KW, Owolabi M, Akinyemi R, Jenkins C, Arulogun O, Akpa O, et al. (2017) Shortterm pilot feasibility study of a nurse-led intervention to improve blood pressure control after stroke in Nigeria. *Journal of the Neurological Sciences*. 377:116-20.
