# Supplementary material for: Non-pharmacological interventions to achieve blood pressure control in African patients: a systematic review
Source: PubMed Central journal article supplement — BMJ Open. 2022 Feb 28;12(2):e048079. doi: 10.1136/bmjopen-2020-048079 (PMC8886440; doi:10.1136/bmjopen-2020-048079), 2022-02-28
Supplement: bmjopen-2020-048079supp003.pdf [file bmjopen-2020-048079supp003.pdf]

**Adeyemo 2013**

Adeyemo A, Tayo BO, Luke A, Ogedegbe O, Durazo-Arvizu R, Cooper RS. The Nigerian antihypertensive adherence trial: a community-based randomized trial. *Journal of Hypertension*. 2013.

DOI: <https://doi.org/10.1007/s11892-019-1161-2>

**Akintunde 2018**

Akintunde A, Nondi J, Gogo K, Jones ESW, Rayner BL, Hackam DG, et al. Physiological Phenotyping for Personalized Therapy of Uncontrolled Hypertension in Africa. *Am J Hypertens*. 2017.

DOI: <https://doi.org/10.1093/ajh/hpx066>

**Aweto 2012**

Aweto HA, Owoeye OB, Akinbo SR, Onabajo AA. Effects of dance movement therapy on selected cardiovascular parameters and estimated maximum oxygen consumption in hypertensive patients. *Nigerian Quarterly Journal of Hospital Medicine*. 2012.

PMID: <https://europepmc.org/article/med/23175912>

**Ayodapo 2019**

Ayodapo AO, Olukokun TAV. Lifestyle counselling and behavioural change: role among adult hypertensives in a rural tertiary institution. *South African Family Practice*. 2019.

DOI: <https://doi.org/10.1080/20786190.2019.1569453>

**Bobrow 2016**

Bobrow K, Farmer AJ, Springer D, Shanyinde M, Yu LM, Brennan T, et al. Mobile Phone Text Messages to Support Treatment Adherence in Adults With High Blood Pressure (SMS-Text Adherence Support [StAR]): A Single-Blind, Randomized Trial. *Circulation*. 2016.

DOI: <https://doi.org/10.1161/CIRCULATIONAHA.115.017530>

Leon N, Surender R, Bobrow K, Muller J, Farmer A. Improving treatment adherence for blood pressure lowering via mobile phone SMS-messages in South Africa: a qualitative evaluation of the SMS-text Adherence Support (StAR) trial. *BMC Family Practice*. 2015.

DOI: <https://doi.org/10.1186/s12875-015-0289-7>

**Bolarinwa 2019**

Bolarinwa OA, Juni MH, Nor Afiah MZ, Salmiah MS, Akande TM. Mid-term impact of home-based follow-up care on health-related quality of life of hypertensive patients at a teaching hospital in Ilorin, Nigeria. *Niger J Clin Pract*. 2019.

PMID: <https://europepmc.org/article/med/30666023>

**Cappuccio 2006**

Cappuccio FP, Kerry SM, Micah FB, Plange-Rhule J, Eastwood JB. A community programme to reduce salt intake and blood pressure in Ghana. *BMC Public Health*. 2006.

DOI: <https://doi.org/10.1186/1471-2458-6-13>

#### **Charlton 2009**

Charlton KE, Steyn K, Levitt NS, Peer N, Jonathan D, Gogela T, et al. A food-based dietary strategy lowers blood pressure in a low socio-economic setting: a randomised study in South Africa. *Public Health Nutrition*. 2008.

DOI: <https://doi.org/10.1017/S136898000800342X>

#### **Fairall 2016**

Fairall LR, Folb N, Timmerman V, Lombard C, Steyn K, Bachmann MO, et al. Educational Outreach with an Integrated Clinical Tool for Nurse-Led Non-communicable Chronic Disease Management in Primary Care in South Africa: A Pragmatic Cluster Randomised Controlled Trial. *PLoS Medicine / Public Library of Science*. 2016.

DOI: <https://doi.org/10.1371/journal.pmed.1002178>

Folb N, Timmerman V, Levitt NS, Steyn K, Bachmann MO, Lund C, et al. Multimorbidity, control and treatment of noncommunicable diseases among primary healthcare attenders in the Western Cape, South Africa. *S Afr Med J*. 2015.

DOI: <http://dx.doi.org/10.7196/SAMJNEW.7882>

#### **Goudge 2018**

Goudge J, Chirwa T, Eldridge S, Gómez-Olivé FXF, Kabudula C, Limbani F, et al. Can lay health workers support the management of hypertension? Findings of a cluster randomised trial in South Africa. *BMJ Glob Health*. 2018.

DOI: <https://doi.org/10.1136/bmjgh-2017-000577>

#### **Gyamfi 2017**

Gyamfi J, Plange-Rhule J, Iwelunmor J, Lee D, Blackstone SR, Mitchell A, et al. Training nurses in task-shifting strategies for the management and control of hypertension in Ghana: a mixed-methods study. *BMC Health Serv Res*. 2017.

DOI: <https://doi.org/10.1186/s12913-017-2026-5>

Ogedegbe G, Plange-Rhule J, Gyamfi J, Chaplin W, Ntim M, Apusiga K, et al. Health insurance coverage with or without a nurse-led task shifting strategy for hypertension control: A pragmatic cluster randomized trial in Ghana. *PLoS Med*. 2018.

DOI: <https://doi.org/10.1371/journal.pmed.1002561>

Ogedegbe G, Plange-Rhule J, Gyamfi J, Chaplin W, Ntim M, Apusiga K, et al. A cluster-randomized trial of task shifting and blood pressure control in Ghana: study protocol. *Implement Sci*. 2014.

DOI: <https://doi.org/10.1186/1748-5908-9-73>

#### **Labhardt 2011**

Labhardt ND, Balo JR, Ndam M, Manga E, Stoll B. Improved retention rates with low-cost interventions in hypertension and diabetes management in a rural African environment of nurse-led care: a cluster-randomised trial. *Tropical Medicine & International Health*. 2011.

DOI: <https://doi.org/10.1111/j.1365-3156.2011.02827.x>

#### **Lamina 2010**

Lamina S. Effects of continuous and interval training programs in the management of hypertension: a randomized controlled trial. *Journal of clinical hypertension*. 2010.

DOI: <https://doi.org/10.1111/j.1751-7176.2010.00315.x>

Lamina S. Comparative effect of interval and continuous training programs on serum uric acid in management of hypertension: a randomized controlled trial. *Journal of Strength & Conditioning Research*. 2011.

PMID: <https://www.ncbi.nlm.nih.gov/pubmed/20574413>

Lamina S, Okoye CG. Effect of low intensity continuous training programme on serum uric acid in the non pharmacological management of hypertension: a randomized controlled trial. *Nigerian journal of medicine : journal of the national association of resident doctors of nigeria*. 2010.

PMID: <https://pubmed.ncbi.nlm.nih.gov/23672102/>

Lamina S, Okoye CG. Uricemia as a cardiovascular events risk factor in hypertension: the role of interval training programme in its downregulation. *Journal of the Association of Physicians of India*. 2011.

PMID: <https://pubmed.ncbi.nlm.nih.gov/21751661/>

Lamina S, Okoye CG. Effect of interval training program on white blood cell count in the management of hypertension: A randomized controlled study. *Nigerian Medical Journal*. 2011.

PMID: <https://pubmed.ncbi.nlm.nih.gov/22529513/>

Lamina S, Okoye CG, Dagogo TT. Managing erectile dysfunction in hypertension: the effects of a continuous training programme on biomarker of inflammation. *BJU international*. 2009.

DOI: <https://doi.org/10.1111/j.1464-410X.2008.08254.x>

Lamina S, Okoye CG, Dagogo TT. Therapeutic effect of an interval exercise training program in the management of erectile dysfunction in hypertensive patients. *Journal of clinical hypertension (greenwich, conn)* [Internet]. 2009.

DOI: <https://doi.org/10.1111/j.1751-7176.2009.00086.x>

Lamina S, Okoye CG, Hanif SM. Randomised controlled trial: effects of aerobic exercise training programme on indices of adiposity and metabolic markers in hypertension. *JPMA - Journal of the Pakistan Medical Association*. 2013.

PMID: <https://pubmed.ncbi.nlm.nih.gov/23901664/>

Lamina S, Okoye CG, Hanif SM. Effects of interval exercise training programme on the indices of adiposity and biomarker of inflammation in hypertension: a randomised controlled trial. *Nigerian Postgraduate Medical Journal*. 2014.

PMID: <https://pubmed.ncbi.nlm.nih.gov/25126867/>

Lamina S, Okoye G. Effects of aerobic exercise training on psychosocial status and serum uric Acid in men with essential hypertension: a randomized controlled trial. *Annals of Medical & Health Sciences Research*. 2012.

PMID: <https://pubmed.ncbi.nlm.nih.gov/23439606/>

Lamina S, Okoye GC. Therapeutic effect of a moderate intensity interval training program on the lipid profile in men with hypertension: a randomized controlled trial. *Nigerian journal of clinical practice*. 2012.

PMID: <https://pubmed.ncbi.nlm.nih.gov/22437088/>

Lamina S, Okoye GC. Effect of interval exercise training programme on C-reactive protein in the non-pharmacological management of hypertension: a randomized controlled trial. *African journal of medicine and medical sciences*. 2012.

PMID: <https://pubmed.ncbi.nlm.nih.gov/23672102/>

### **Maruf 2013**

Maruf FA, Akinpelu AO, Salako BL. Self-reported quality of life before and after aerobic exercise training in individuals with hypertension: a randomised-controlled trial. *Applied Psychology Health and Well-being*. 2013.

DOI: <https://doi.org/10.1111/aphw.12005>

Maruf FA, Akinpelu AO, Salako BL, Akinyemi JO. Effects of aerobic dance training on blood pressure in individuals with uncontrolled hypertension on two antihypertensive drugs: a randomized clinical trial. *Journal of the American Society of Hypertension*. 2016.

DOI: <https://doi.org/10.1016/j.jash.2016.02.002>

### **Mendis 2010**

Mendis S, Johnston SC, Fan W, Oladapo O, Cameron A, Faramawi MF. Cardiovascular risk management and its impact on hypertension control in primary care in low-resource settings: a cluster-randomized trial. *Bulletin of the World Health Organization*. 2010.

PMID: <https://www.ncbi.nlm.nih.gov/pmc/articles/PMC2878142/>

### **Okeahialam 2011**

Okeahialam B, Ohihoin E, Ajuluchukwu J. Chronotherapy in Nigerian hypertensives. *Therapeutic Advances in Cardiovascular Disease*. 2011;5(2):113-8.

DOI: <https://doi.org/10.1177%2F1753944711402119>

#### **Owolabi 2019**

Owolabi MO, Gebregziabher M, Akinyemi RO, Akinyemi JO, Akpa O, Olaniyan O, et al. Randomized Trial of an Intervention to Improve Blood Pressure Control in Stroke Survivors. *Circulation Cardiovascular Quality & Outcomes*. 2019.

DOI: <https://doi.org/10.1161/CIRCOUTCOMES.119.005904>

#### **Sarfo 2019**

Sarfo FS, Ovbiagele B. Stroke minimization through additive anti-atherosclerotic agents in routine treatment (SMAART): a pilot trial concept for improving stroke outcomes in sub-Saharan Africa. *Journal of the neurological sciences*. 2017.

DOI: <https://doi.org/10.1016/j.jns.2017.04.012>

Sarfo FS, Treiber F, Gebregziabher M, Adamu S, Nichols M, Singh A, et al. Phone-based intervention for blood pressure control among Ghanaian stroke survivors: A pilot randomized controlled trial. *Int J Stroke*. 2019.

DOI: <https://doi.org/10.1177%2F1747493018816423>

Sarfo FS, Treiber F, Jenkins C, Patel S, Gebregziabher M, Singh A, et al. Phone-based Intervention under Nurse Guidance after Stroke (PINGS): study protocol for a randomized controlled trial. *Trials*. 2016.

DOI: <https://doi.org/10.1186/s13063-016-1557-0>

#### **Saunders 1991**

Saunders LD, Irwig LM, Gear JS, Ramushu DL. A randomized controlled trial of compliance improving strategies in Soweto hypertensives. *Medical Care*. 1991.

PMID: <https://pubmed.ncbi.nlm.nih.gov/2072772/>

#### **Stewart 2005**

Stewart A, Noakes T, Eales C, Shepard K, Becker P, Veriawa Y. Adherence to cardiovascular risk factor modification in patients with hypertension. *Cardiovascular journal of South Africa*. 2005

PMID: <https://pubmed.ncbi.nlm.nih.gov/15915277/>

#### **Steyn 2013**

Steyn K, Lombard C, Gwebushe N, Fourie JM, Everett-Murphy K, Zwarenstein M, et al. Implementation of national guidelines, incorporated within structured diabetes and hypertension records at primary level care in Cape Town, South Africa: a randomised controlled trial. *Glob Health Action*. 2013.

DOI: <http://dx.doi.org/10.3402/gha.v6i0.20796>

**Turky 2013**

Turky K, Elnahas N, Oruch R. Effects of exercise training on postmenopausal hypertension: Implications on nitric oxide levels. *Medical journal of Malaysia* [Internet]. 2013.

PMID: <https://pubmed.ncbi.nlm.nih.gov/24632913/>

**Vedanthan 2019**

Vedanthan R, Kamano JH, DeLong AK, Naanyu V, Binanay CA, Bloomfield GS, et al. Community Health Workers Improve Linkage to Hypertension Care in Western Kenya. *J Am Coll Cardiol*. 2019.

DOI: <https://doi.org/10.1016/j.jacc.2019.08.003>

Vedanthan R, Kamano JH, Naanyu V, DeLong AK, Were MC, Finkelstein EA, et al. Optimizing linkage and retention to hypertension care in rural Kenya (LARK hypertension study): study protocol for a randomized controlled trial. *Trials*. 2014.

DOI: <https://doi.org/10.1186/1745-6215-15-143>

**Wahab 2017**

Wahab KW, Owolabi M, Akinyemi R, Jenkins C, Arulogun O, Akpa O, et al. Short-term pilot feasibility study of a nurse-led intervention to improve blood pressure control after stroke in Nigeria. *Journal of the Neurological Sciences*. 2017.

DOI: <https://doi.org/10.1016/j.jns.2017.04.005>
